# Supplementary material for: Production of Antioxidant Molecules in Polygonum aviculare (L.) and Senecio vulgaris (L.) under Metal Stress: A Possible Tool in the Evaluation of Plant Metal Tolerance
Source: MDPI journal article supplement (doi:10.3390/ijms21197317), 2020-10-03
Supplement: s1 [file s1]

**Supplementary Table S3.** Spearman correlation coefficients ( $\rho$ ) between shoot metal concentration and plant biological parameters. Non-significant correlations (positive values) or anti-correlations (negative values), corresponding to  $|\rho| < 0.300$ , are highlighted in red. Poorly significant values ( $0.301 < |\rho| < 0.500$ ), are highlighted in orange. **Excellent** values ( $|\rho| > 0.701$ ) are in **black** color; the remaining good correlation/anticorrelation values ( $0.501 < |\rho| < 0.700$ ) are highlighted in blue. Populations: B, Bologna urban; M, Milan urban; N, Bologna woodland; T, Milan woodland; P, serpentine. A. activity: antioxidant activity, P. pigments: photosynthetic pigments (sum of chlorophyll *a*, chlorophyll *b*, carotenoid levels).

| <i>P. aviculare</i> |             | Cu     | Pb     | Cr     | Ni     | Cd     | Zn     | <i>S. vulgaris</i> |             | Cu     | Pb     | Cr     | Ni     | Cd     | Zn     |
|---------------------|-------------|--------|--------|--------|--------|--------|--------|--------------------|-------------|--------|--------|--------|--------|--------|--------|
| population B        | Shoot FW    | -0.890 | -0.859 | -0.850 | -0.904 | -0.835 | -0.901 | population B       | Shoot FW    | -0.976 | -0.928 | -0.841 | -0.683 | -0.920 | -0.877 |
|                     | Flavonoids  | 0.786  | 0.923  | 0.691  | 0.950  | 0.446  | 0.823  |                    | Flavonoids  | 0.836  | 0.570  | 0.890  | 0.584  | 0.749  | 0.723  |
|                     | Polyphenols | 0.638  | 0.770  | 0.881  | 0.678  | 0.632  | 0.575  |                    | Polyphenols | 0.709  | 0.739  | 0.896  | 0.628  | 0.166  | 0.600  |
|                     | A. activity | 0.281  | 0.752  | 0.615  | 0.836  | 0.235  | 0.825  |                    | A. activity | 0.768  | 0.868  | 0.298  | 0.143  | 0.710  | 0.683  |
|                     | P. pigments | -0.908 | -0.852 | -0.540 | -0.871 | -0.117 | -0.830 |                    | P. pigments | -0.839 | -0.509 | -0.600 | -0.576 | -0.720 | -0.873 |
| population M        | Shoot FW    | -0.714 | -0.858 | -0.740 | -0.787 | -0.829 | -0.742 | population M       | Shoot FW    | -0.807 | -0.904 | -0.874 | -0.587 | -0.807 | -0.711 |
|                     | Flavonoids  | 0.936  | 0.940  | 0.205  | 0.915  | 0.733  | 0.484  |                    | Flavonoids  | 0.612  | 0.342  | 0.664  | 0.414  | 0.531  | 0.761  |
|                     | Polyphenols | 0.646  | 0.919  | 0.365  | 0.632  | 0.821  | 0.695  |                    | Polyphenols | 0.708  | 0.952  | 0.862  | 0.928  | 0.864  | 0.891  |
|                     | A. activity | 0.599  | 0.880  | 0.898  | 0.925  | 0.146  | 0.270  |                    | A. activity | 0.928  | 0.270  | 0.877  | 0.329  | 0.881  | 0.746  |
|                     | P. pigments | -0.587 | -0.456 | -0.289 | -0.476 | -0.623 | -0.683 |                    | P. pigments | -0.859 | -0.729 | -0.41  | -0.906 | -0.758 | -0.898 |
| population N        | Shoot FW    | -0.935 | -0.875 | -0.805 | -0.967 | -0.965 | -0.755 | population N       | Shoot FW    | -0.867 | -0.955 | -0.786 | -0.872 | -0.883 | -0.877 |
|                     | Flavonoids  | 0.608  | 0.114  | 0.801  | 0.564  | 0.501  | 0.853  |                    | Flavonoids  | 0.667  | 0.663  | 0.655  | 0.478  | 0.442  | 0.863  |
|                     | Polyphenols | 0.879  | 0.813  | 0.836  | 0.866  | 0.856  | 0.828  |                    | Polyphenols | 0.643  | 0.890  | 0.569  | 0.131  | 0.560  | 0.611  |
|                     | A. activity | 0.122  | 0.238  | 0.503  | 0.500  | 0.660  | 0.657  |                    | A. activity | 0.216  | 0.131  | 0.211  | 0.325  | 0.770  | 0.578  |
|                     | P. pigments | -0.408 | -0.501 | -0.328 | -0.733 | -0.823 | -0.512 |                    | P. pigments | -0.807 | -0.582 | -0.270 | -0.870 | -0.518 | -0.824 |
| population T        | Shoot FW    | -0.910 | -0.893 | -0.844 | -0.656 | -0.895 | -0.916 | population T       | Shoot FW    | -0.883 | -0.958 | -0.893 | -0.926 | -0.897 | -0.741 |
|                     | Flavonoids  | 0.946  | 0.849  | 0.956  | 0.170  | 0.472  | 0.677  |                    | Flavonoids  | 0.905  | 0.676  | 0.765  | 0.653  | 0.585  | 0.862  |
|                     | Polyphenols | 0.585  | 0.662  | 0.493  | 0.162  | 0.116  | 0.856  |                    | Polyphenols | 0.838  | 0.671  | 0.959  | 0.514  | 0.848  | 0.956  |
|                     | A. activity | 0.695  | 0.877  | 0.692  | 0.370  | 0.684  | 0.696  |                    | A. activity | 0.967  | 0.924  | 0.576  | 0.182  | 0.661  | 0.985  |
|                     | P. pigments | -0.902 | -0.941 | -0.41  | -0.765 | -0.931 | -0.697 |                    | P. pigments | -0.948 | -0.903 | -0.257 | -0.863 | -0.125 | -0.929 |
| population P        | Shoot FW    | -0.908 | -0.853 | -0.885 | -0.931 | -0.894 | -0.846 | population P       | Shoot FW    | -0.945 | -0.935 | -0.416 | -0.913 | -0.905 | -0.911 |
|                     | Flavonoids  | 0.816  | 0.859  | 0.669  | 0.487  | 0.126  | 0.343  |                    | Flavonoids  | 0.806  | 0.613  | 0.337  | 0.197  | 0.634  | 0.602  |
|                     | Polyphenols | 0.922  | 0.901  | 0.644  | 0.724  | 0.611  | 0.878  |                    | Polyphenols | 0.333  | 0.294  | 0.692  | 0.616  | 0.119  | 0.868  |
|                     | A. activity | 0.929  | 0.891  | 0.836  | 0.822  | 0.650  | 0.960  |                    | A. activity | 0.614  | 0.223  | 0.566  | 0.940  | 0.256  | 0.975  |
|                     | P. pigments | -0.893 | -0.824 | -0.579 | -0.940 | -0.935 | -0.959 |                    | P. pigments | -0.937 | -0.620 | -0.707 | -0.842 | -0.778 | -0.963 |
