# Supplementary material for: Production of Antioxidant Molecules in Polygonum aviculare (L.) and Senecio vulgaris (L.) under Metal Stress: A Possible Tool in the Evaluation of Plant Metal Tolerance
Source: MDPI journal article supplement (doi:10.3390/ijms21197317), 2020-10-03
Supplement: s1 [file s1]

**Supplementary Table S1.** Complete dataset of *Polygonum aviculare*.

| Sample    | populat | treatment | factor_conc | Conc_met | shoot_fresh_wt | dry_wt | metal_ppm_shoot | flavon | poly   | act_antiox | photo_pigm |
|-----------|---------|-----------|-------------|----------|----------------|--------|-----------------|--------|--------|------------|------------|
| B1control | B       | control   | 0           | 0        | 1.3849         | 0.1637 | 5.714           | 1.7918 | 5.1222 | 4.7183     | 237.8634   |
| B1control | B       | control   | 0           | 0        | 1.2014         | 0.142  | 5.943           | 1.7953 | 4.3559 | 4.9151     | 236.8934   |
| B1control | B       | control   | 0           | 0        | 0.9954         | 0.1176 | 5.485           | 1.7989 | 5.1197 | 4.6877     | 236.8976   |
| B1control | B       | control   | 0           | 0        | 1.1939         | 0.1411 | 6.085           | 2.0692 | 6.054  | 4.8846     | 237.2181   |
| B1control | B       | control   | 0           | 0        | 1.1939         | 0.1411 | 5.343           | 2.0804 | 4.5927 | 4.7047     | 220.3076   |
| B1control | B       | control   | 0           | 0        | 1.2037         | 0.1453 | 5.732           | 2.0621 | 4.5978 | 4.9016     | 246.3967   |
| B1Cu1/2   | B       | Cu        | A           | 0.13     | 0.0095         | 0.0015 | 19.335          | 1.9316 | 5.0649 | 4.3147     | 195.2358   |
| B1Cu1/2   | B       | Cu        | A           | 0.13     | 0.0103         | 0.0016 | 19.818          | 1.9341 | 5.0923 | 3.9288     | 195.2965   |
| B1Cu1/2   | B       | Cu        | A           | 0.13     | 0.015          | 0.0023 | 18.852          | 1.9356 | 5.0923 | 4.338      | 186.6018   |
| B1Cu1/2   | B       | Cu        | A           | 0.13     | 0.0116         | 0.0018 | 19.342          | 1.8438 | 4.9925 | 3.9022     | 201.0522   |
| B1Cu1/2   | B       | Cu        | A           | 0.13     | 0.0116         | 0.0018 | 19.328          | 1.8503 | 5.01   | 4.2914     | 173.2842   |
| B1Cu1/2   | B       | Cu        | A           | 0.13     | 0.0118         | 0.0018 | 18.857          | 1.8458 | 4.9975 | 3.8822     | 212.5543   |
| B1Cu0     | B       | Cu        | B           | 0.26     | 0.0012         | 0.0002 | 34.481          | 2.1487 | 6.1751 | 2.7379     | 183.6135   |
| B1Cu0     | B       | Cu        | B           | 0.26     | 0.008          | 0.0012 | 39.574          | 1.8922 | 3.7375 | 2.5649     | 200.793    |
| B1Cu0     | B       | Cu        | B           | 0.26     | 0.0014         | 0.0002 | 29.387          | 2.2156 | 3.7001 | 2.7079     | 201.1366   |
| B1Cu0     | B       | Cu        | B           | 0.26     | 0.0035         | 0.0005 | 34.573          | 2.2315 | 6.3024 | 2.5349     | 195.181    |
| B1Cu0     | B       | Cu        | B           | 0.26     | 0.0035         | 0.0005 | 34.388          | 2.1891 | 3.7799 | 2.7246     | 183.0839   |
| B1Cu0     | B       | Cu        | B           | 0.26     | 0.0036         | 0.0005 | 29.448          | 1.8887 | 3.8523 | 2.5516     | 216.1785   |
| B1Cu2.5   | B       | Cu        | C           | 0.65     | 0.0008         | 0.0001 | 68.003          | 2.0781 | 8.7302 | 5.6682     | 148.8108   |
| B1Cu2.5   | B       | Cu        | C           | 0.65     | 0.0005         | 0.0001 | 78.434          | 2.1219 | 8.786  | 5.2248     | 149.055    |
| B1Cu2.5   | B       | Cu        | C           | 0.65     | 0.0002         | 0.0001 | 57.573          | 2.3116 | 8.9814 | 5.6403     | 142.6337   |
| B1Cu2.5   | B       | Cu        | C           | 0.65     | 0.0005         | 0.0001 | 71.933          | 2.3237 | 8.5558 | 5.2527     | 146.8331   |
| B1Cu2.5   | B       | Cu        | C           | 0.65     | 0.0005         | 0.0001 | 64.073          | 2.0558 | 8.5651 | 5.6558     | 145.0304   |
| B1Cu2.5   | B       | Cu        | C           | 0.65     | 0.0005         | 0.0001 | 60.193          | 2.2679 | 9.186  | 5.2403     | 158.8319   |
| B1Cu5     | B       | Cu        | D           | 1.3      | 0.0005         | 0.0001 | 296.38          | 4.9851 | 7.9833 | 5.0558     | 77.5395    |
| B1Cu5     | B       | Cu        | D           | 1.3      | 0.001          | 0.0002 | 322.204         | 5.334  | 8.0266 | 4.5353     | 77.7492    |
| B1Cu5     | B       | Cu        | D           | 1.3      | 0.0003         | 0.0001 | 270.557         | 5.3271 | 7.9926 | 5.0186     | 74.3559    |
| B1Cu5     | B       | Cu        | D           | 1.3      | 0.0006         | 0.0001 | 323.054         | 5.1264 | 7.723  | 4.4981     | 76.5482    |

|           |   |         |   |       |        |        |          |        |         |         |          |
|-----------|---|---------|---|-------|--------|--------|----------|--------|---------|---------|----------|
| B1Cu5     | B | Cu      | D | 1.3   | 0.0006 | 0.0001 | 269.706  | 5.3309 | 7.7416  | 5.0392  | 72.6601  |
| B1Cu5     | B | Cu      | D | 1.3   | 0.0006 | 0.0001 | 252.774  | 5.3519 | 7.7292  | 4.5188  | 81.7155  |
| B1control | B | control | 0 | 0     | 1.3849 | 0.1637 | 4.008    | 1.7918 | 5.1222  | 4.7183  | 237.8634 |
| B1control | B | control | 0 | 0     | 1.2014 | 0.142  | 4.035    | 1.7953 | 4.3559  | 4.9151  | 236.8934 |
| B1control | B | control | 0 | 0     | 0.9954 | 0.1176 | 3.981    | 1.7989 | 5.1197  | 4.6877  | 236.8976 |
| B1control | B | control | 0 | 0     | 1.1939 | 0.1411 | 4.191    | 2.0692 | 6.054   | 4.8846  | 237.2181 |
| B1control | B | control | 0 | 0     | 1.1939 | 0.1411 | 3.825    | 2.0804 | 4.5927  | 4.7047  | 220.3076 |
| B1control | B | control | 0 | 0     | 1.2037 | 0.1453 | 3.859    | 2.0621 | 4.5978  | 4.9016  | 246.3967 |
| B1Pb0     | B | Pb      | A | 0.025 | 0.1143 | 0.0123 | 4.1      | 4.4144 | 2.5287  | 3.2122  | 288.5747 |
| B1Pb0     | B | Pb      | A | 0.025 | 0.4052 | 0.0438 | 4.793    | 4.1587 | 2.5598  | 3.2792  | 294.6834 |
| B1Pb0     | B | Pb      | A | 0.025 | 0.2732 | 0.0295 | 3.407    | 4.0148 | 2.512   | 3.2409  | 295.2696 |
| B1Pb0     | B | Pb      | A | 0.025 | 0.2642 | 0.0285 | 4.223    | 4.4551 | 2.5956  | 3.3078  | 292.8426 |
| B1Pb0     | B | Pb      | A | 0.025 | 0.2642 | 0.0285 | 3.977    | 4.2213 | 2.6267  | 3.2282  | 282.0204 |
| B1Pb0     | B | Pb      | A | 0.025 | 0.2701 | 0.0298 | 3.325    | 4.0148 | 2.5789  | 3.2951  | 312.6737 |
| B1Pb10    | B | Pb      | B | 0.25  | 0.0576 | 0.0074 | 351      | 4.6583 | 3.5545  | 4.2246  | 247.1796 |
| B1Pb10    | B | Pb      | B | 0.25  | 0.0346 | 0.0045 | 389.105  | 4.9899 | 3.5859  | 4.1023  | 231.9865 |
| B1Pb10    | B | Pb      | B | 0.25  | 0.0218 | 0.0028 | 312.895  | 4.8195 | 3.5376  | 4.2535  | 232.128  |
| B1Pb10    | B | Pb      | B | 0.25  | 0.038  | 0.0049 | 365.509  | 4.6081 | 3.4653  | 4.1313  | 237.098  |
| B1Pb10    | B | Pb      | B | 0.25  | 0.038  | 0.0049 | 336.491  | 4.847  | 3.4966  | 4.2407  | 223.7672 |
| B1Pb10    | B | Pb      | B | 0.25  | 0.0383 | 0.0049 | 303.222  | 4.8388 | 3.4484  | 4.1184  | 250.3257 |
| B1Pb50    | B | Pb      | C | 1.25  | 0.0113 | 0.0022 | 459      | 5.0406 | 7.9896  | 10.4385 | 131.7322 |
| B1Pb50    | B | Pb      | C | 1.25  | 0.0099 | 0.0019 | 538.674  | 5.0762 | 8.0218  | 9.4527  | 131.7085 |
| B1Pb50    | B | Pb      | C | 1.25  | 0.017  | 0.0033 | 379.326  | 5.7043 | 7.9723  | 10.4682 | 145.6403 |
| B1Pb50    | B | Pb      | C | 1.25  | 0.0127 | 0.0024 | 473.319  | 5.5653 | 8.2765  | 9.423   | 136.3603 |
| B1Pb50    | B | Pb      | C | 1.25  | 0.0127 | 0.0025 | 444.681  | 5.0213 | 8.3086  | 10.455  | 134.7687 |
| B1Pb50    | B | Pb      | C | 1.25  | 0.0131 | 0.0025 | 369.779  | 5.0406 | 8.2591  | 9.4395  | 148.5261 |
| B1Pb100   | B | Pb      | D | 2.5   | 0.0312 | 0.0062 | 1082     | 6.8263 | 10.5986 | 12.5021 | 100.8734 |
| B1Pb100   | B | Pb      | D | 2.5   | 0.0105 | 0.0021 | 1194.583 | 6.9237 | 10.639  | 12.5931 | 101.1838 |
| B1Pb100   | B | Pb      | D | 2.5   | 0.0087 | 0.0017 | 969.417  | 6.5993 | 10.5769 | 12.4648 | 103.5347 |
| B1Pb100   | B | Pb      | D | 2.5   | 0.0168 | 0.0033 | 1089.762 | 6.5502 | 11.3151 | 12.6303 | 101.864  |
| B1Pb100   | B | Pb      | D | 2.5   | 0.0168 | 0.0033 | 1074.238 | 6.8182 | 11.3555 | 12.4855 | 99.3746  |

|           |   |         |   |       |        |        |         |        |         |         |          |
|-----------|---|---------|---|-------|--------|--------|---------|--------|---------|---------|----------|
| B1Pb100   | B | Pb      | D | 2.5   | 0.0176 | 0.0034 | 964.242 | 6.9888 | 11.2934 | 12.6137 | 109.0668 |
| B1control | B | control | 0 | 0     | 1.3849 | 0.1637 | 0.237   | 1.7918 | 5.1222  | 4.7183  | 237.8634 |
| B1control | B | control | 0 | 0     | 1.2014 | 0.142  | 0.257   | 1.7953 | 4.3559  | 4.9151  | 236.8934 |
| B1control | B | control | 0 | 0     | 0.9954 | 0.1176 | 0.283   | 1.7989 | 5.1197  | 4.6877  | 236.8976 |
| B1control | B | control | 0 | 0     | 1.1939 | 0.1411 | 0.238   | 2.0692 | 6.054   | 4.8846  | 237.2181 |
| B1control | B | control | 0 | 0     | 1.1939 | 0.1411 | 0.203   | 2.0804 | 4.5927  | 4.7047  | 220.3076 |
| B1control | B | control | 0 | 0     | 1.2037 | 0.1453 | 0.272   | 2.0621 | 4.5978  | 4.9016  | 246.3967 |
| B1Cr0     | B | Cr      | A | 0.036 | 0.3356 | 0.0408 | 1.624   | 2.2612 | 4.9761  | 4.6954  | 278.1504 |
| B1Cr0     | B | Cr      | A | 0.036 | 0.5116 | 0.0622 | 1.684   | 2.1962 | 5.1746  | 4.1818  | 278.085  |
| B1Cr0     | B | Cr      | A | 0.036 | 0.5303 | 0.0645 | 1.564   | 2.09   | 5.0813  | 4.6667  | 288.2379 |
| B1Cr0     | B | Cr      | A | 0.036 | 0.4592 | 0.0559 | 1.883   | 2.0866 | 5.1364  | 4.1531  | 281.4911 |
| B1Cr0     | B | Cr      | A | 0.036 | 0.4592 | 0.0559 | 1.365   | 2.2488 | 4.9211  | 4.6826  | 260.6558 |
| B1Cr0     | B | Cr      | A | 0.036 | 0.4803 | 0.058  | 1.391   | 2.1962 | 5.1483  | 4.1691  | 282.9568 |
| B1Cr5     | B | Cr      | B | 0.18  | 0.015  | 0.0019 | 2.051   | 1.8926 | 7.3787  | 4.8812  | 249.7377 |
| B1Cr5     | B | Cr      | B | 0.18  | 0.0492 | 0.0062 | 2.651   | 1.902  | 7.3119  | 4.4554  | 248.7837 |
| B1Cr5     | B | Cr      | B | 0.18  | 0.0665 | 0.0083 | 2.451   | 1.8876 | 7.0644  | 4.8515  | 249.1269 |
| B1Cr5     | B | Cr      | B | 0.18  | 0.0436 | 0.0055 | 2.18    | 1.9881 | 7.1683  | 4.4257  | 249.2161 |
| B1Cr5     | B | Cr      | B | 0.18  | 0.0436 | 0.0055 | 1.922   | 1.9851 | 7.0743  | 4.868   | 240.1475 |
| B1Cr5     | B | Cr      | B | 0.18  | 0.0445 | 0.0055 | 2.365   | 1.9812 | 7.2228  | 4.4422  | 257.7214 |
| B1Cr10    | B | Cr      | C | 0.36  | 0.0381 | 0.0062 | 21.269  | 2.5454 | 11.328  | 5.419   | 228.6754 |
| B1Cr10    | B | Cr      | C | 0.36  | 0.01   | 0.0016 | 25.94   | 2.5747 | 11.224  | 5.4033  | 228.7959 |
| B1Cr10    | B | Cr      | C | 0.36  | 0.0112 | 0.0018 | 20.598  | 2.4414 | 10.3828 | 5.4474  | 216.4367 |
| B1Cr10    | B | Cr      | C | 0.36  | 0.0198 | 0.0032 | 21.968  | 2.466  | 11.5595 | 5.4316  | 224.636  |
| B1Cr10    | B | Cr      | C | 0.36  | 0.0198 | 0.0032 | 20.57   | 2.5477 | 11.5643 | 5.4348  | 202.1786 |
| B1Cr10    | B | Cr      | C | 0.36  | 0.0206 | 0.0032 | 16.132  | 2.5931 | 10.6191 | 5.419   | 240.4337 |
| B1Cr25    | B | Cr      | D | 0.90  | 0.06   | 0.0142 | 20.469  | 3.8986 | 12.7023 | 9.5577  | 205.8413 |
| B1Cr25    | B | Cr      | D | 0.90  | 0.0452 | 0.0107 | 23.94   | 4.082  | 12.6294 | 8.9608  | 206.2528 |
| B1Cr25    | B | Cr      | D | 0.90  | 0.0238 | 0.0056 | 19.478  | 4.2443 | 11.9471 | 9.5254  | 206.5818 |
| B1Cr25    | B | Cr      | D | 0.90  | 0.043  | 0.0102 | 21.968  | 4.2163 | 11.9795 | 8.9932  | 206.2253 |
| B1Cr25    | B | Cr      | D | 0.90  | 0.043  | 0.0102 | 20.57   | 3.9056 | 12.7157 | 9.5433  | 205.1626 |
| B1Cr25    | B | Cr      | D | 0.90  | 0.0434 | 0.0105 | 18.2132 | 4.103  | 12.5539 | 8.9788  | 221.7355 |

|           |   |         |   |       |        |        |         |        |         |        |          |
|-----------|---|---------|---|-------|--------|--------|---------|--------|---------|--------|----------|
| B1control | B | control | 0 | 0     | 1.3849 | 0.1637 | 5.698   | 1.7918 | 5.1222  | 4.7183 | 237.8634 |
| B1control | B | control | 0 | 0     | 1.2014 | 0.142  | 5.902   | 1.7953 | 4.3559  | 4.9151 | 236.8934 |
| B1control | B | control | 0 | 0     | 0.9954 | 0.1176 | 5.494   | 1.7989 | 5.1197  | 4.6877 | 236.8976 |
| B1control | B | control | 0 | 0     | 1.1939 | 0.1411 | 5.905   | 2.0692 | 6.054   | 4.8846 | 237.2181 |
| B1control | B | control | 0 | 0     | 1.1939 | 0.1411 | 5.49    | 2.0804 | 4.5927  | 4.7047 | 220.3076 |
| B1control | B | control | 0 | 0     | 1.2037 | 0.1453 | 5.355   | 2.0621 | 4.5978  | 4.9016 | 246.3967 |
| B1Ni0     | B | Ni      | A | 0.025 | 0.1609 | 0.0202 | 8.575   | 3.2139 | 3.1029  | 5.7316 | 280.2845 |
| B1Ni0     | B | Ni      | A | 0.025 | 0.1235 | 0.0155 | 8.819   | 3.0096 | 3.0474  | 5.5735 | 275.905  |
| B1Ni0     | B | Ni      | A | 0.025 | 0.2009 | 0.0253 | 8.331   | 3.1776 | 3.055   | 5.7619 | 275.4205 |
| B1Ni0     | B | Ni      | A | 0.025 | 0.1618 | 0.0204 | 8.645   | 3.1645 | 3.1609  | 5.6038 | 277.2033 |
| B1Ni0     | B | Ni      | A | 0.025 | 0.1618 | 0.0204 | 8.505   | 3.2371 | 3.499   | 5.7484 | 255.6139 |
| B1Ni0     | B | Ni      | A | 0.025 | 0.1693 | 0.0204 | 8.284   | 2.9995 | 3.4485  | 5.5903 | 291.577  |
| B1Ni5     | B | Ni      | B | 0.125 | 0.0178 | 0.0023 | 35.644  | 4.61   | 4.9272  | 4.9843 | 205.1654 |
| B1Ni5     | B | Ni      | B | 0.125 | 0.0072 | 0.0009 | 42.393  | 5.2646 | 5.2138  | 5.0909 | 203.164  |
| B1Ni5     | B | Ni      | B | 0.125 | 0.0056 | 0.0007 | 28.895  | 4.9196 | 5.1927  | 5.0125 | 212.799  |
| B1Ni5     | B | Ni      | B | 0.125 | 0.0102 | 0.0013 | 35.91   | 4.6259 | 3.696   | 5.119  | 207.0428 |
| B1Ni5     | B | Ni      | B | 0.125 | 0.0102 | 0.0013 | 35.378  | 5.0508 | 4.0508  | 5      | 192.3703 |
| B1Ni5     | B | Ni      | B | 0.125 | 0.0104 | 0.0013 | 28.718  | 4.8557 | 4.0367  | 5.1065 | 218.442  |
| B1Ni10    | B | Ni      | C | 0.25  | 0.0242 | 0.0044 | 44.355  | 5.0025 | 4.703   | 5.7558 | 171.0709 |
| B1Ni10    | B | Ni      | C | 0.25  | 0.0065 | 0.0012 | 62.3    | 5.0559 | 5.8886  | 6.0264 | 174.5227 |
| B1Ni10    | B | Ni      | C | 0.25  | 0.0125 | 0.0023 | 56.41   | 5.4228 | 5.8936  | 5.7261 | 174.2241 |
| B1Ni10    | B | Ni      | C | 0.25  | 0.0144 | 0.0026 | 45.637  | 5.0307 | 4.7475  | 5.9967 | 173.2726 |
| B1Ni10    | B | Ni      | C | 0.25  | 0.0144 | 0.0026 | 47.073  | 4.9688 | 5.8267  | 5.7426 | 160.2751 |
| B1Ni10    | B | Ni      | C | 0.25  | 0.0144 | 0.0027 | 55.556  | 5.3277 | 5.8193  | 6.0132 | 183.4967 |
| B1Ni25    | B | Ni      | D | 0.625 | 0.0032 | 0.0007 | 404.345 | 6.7044 | 10.011  | 9.8059 | 108.0764 |
| B1Ni25    | B | Ni      | D | 0.625 | 0.0024 | 0.0005 | 503.64  | 6.0747 | 10.0659 | 9.8315 | 107.6976 |
| B1Ni25    | B | Ni      | D | 0.625 | 0.0014 | 0.0003 | 365.051 | 6.1165 | 10.0577 | 9.7729 | 113.1046 |
| B1Ni25    | B | Ni      | D | 0.625 | 0.0023 | 0.0005 | 406.591 | 6.028  | 10.011  | 9.7985 | 109.6262 |
| B1Ni25    | B | Ni      | D | 0.625 | 0.0023 | 0.0005 | 402.1   | 6.1242 | 10      | 9.7912 | 105.5434 |
| B1Ni25    | B | Ni      | D | 0.625 | 0.0023 | 0.0005 | 383.554 | 6.1242 | 10.0522 | 9.8168 | 114.4584 |
| B1control | B | control | 0 | 0     | 1.3849 | 0.1637 | 0.455   | 1.7918 | 5.1222  | 4.7183 | 237.8634 |

|           |   |         |   |           |        |        |        |        |        |        |          |
|-----------|---|---------|---|-----------|--------|--------|--------|--------|--------|--------|----------|
| B1control | B | control | 0 | 0         | 1.2014 | 0.142  | 0.485  | 1.7953 | 4.3559 | 4.9151 | 236.8934 |
| B1control | B | control | 0 | 0         | 0.9954 | 0.1176 | 0.425  | 1.7989 | 5.1197 | 4.6877 | 236.8976 |
| B1control | B | control | 0 | 0         | 1.1939 | 0.1411 | 0.536  | 2.0692 | 6.054  | 4.8846 | 237.2181 |
| B1control | B | control | 0 | 0         | 1.1939 | 0.1411 | 0.374  | 2.0804 | 4.5927 | 4.7047 | 220.3076 |
| B1control | B | control | 0 | 0         | 1.2037 | 0.1453 | 0.371  | 2.0621 | 4.5978 | 4.9016 | 246.3967 |
| B1Cd0     | B | Cd      | A | 0.0000945 | 0.0261 | 0.0028 | 0.621  | 4.666  | 4.4766 | 4.9186 | 269.0429 |
| B1Cd0     | B | Cd      | A | 0.0000945 | 0.3214 | 0.035  | 0.638  | 5.015  | 4.499  | 4.9518 | 262.8842 |
| B1Cd0     | B | Cd      | A | 0.0000945 | 0.6755 | 0.0735 | 0.604  | 5.0543 | 4.4666 | 4.8887 | 262.9326 |
| B1Cd0     | B | Cd      | A | 0.0000945 | 0.341  | 0.0371 | 0.696  | 4.7767 | 4.6211 | 4.9219 | 264.9532 |
| B1Cd0     | B | Cd      | A | 0.0000945 | 0.341  | 0.0371 | 0.546  | 5.0264 | 4.6436 | 4.9053 | 264.2366 |
| B1Cd0     | B | Cd      | A | 0.0000945 | 0.3509 | 0.0386 | 0.554  | 5.1142 | 4.6112 | 4.9385 | 264.2956 |
| B1Cd100   | B | Cd      | B | 0.00945   | 0.1568 | 0.0156 | 2.925  | 4.825  | 4.3025 | 4.6724 | 263.1326 |
| B1Cd100   | B | Cd      | B | 0.00945   | 0.0796 | 0.0079 | 2.239  | 4.8428 | 4.3241 | 4.813  | 251.4612 |
| B1Cd100   | B | Cd      | B | 0.00945   | 0.1868 | 0.0185 | 2.611  | 5.0326 | 4.2929 | 4.6437 | 251.3725 |
| B1Cd100   | B | Cd      | B | 0.00945   | 0.1411 | 0.014  | 3.072  | 4.8389 | 4.9473 | 4.8418 | 255.3221 |
| B1Cd100   | B | Cd      | B | 0.00945   | 0.1411 | 0.014  | 2.779  | 5.4199 | 4.9688 | 4.6596 | 230.9408 |
| B1Cd100   | B | Cd      | B | 0.00945   | 0.1434 | 0.0143 | 2.514  | 5.2752 | 4.9377 | 4.829  | 264.4569 |
| B1Cd500   | B | Cd      | C | 0.04725   | 0.0234 | 0.0037 | 16.131 | 5.3432 | 5.0922 | 5.6592 | 259.9263 |
| B1Cd500   | B | Cd      | C | 0.04725   | 0.0157 | 0.0025 | 17.323 | 5.3489 | 5.1153 | 5.5225 | 248.1381 |
| B1Cd500   | B | Cd      | C | 0.04725   | 0.0226 | 0.0036 | 17.939 | 5.3535 | 5.082  | 5.6899 | 248.3904 |
| B1Cd500   | B | Cd      | C | 0.04725   | 0.0206 | 0.0033 | 16.384 | 5.3607 | 5.1691 | 5.5533 | 252.1516 |
| B1Cd500   | B | Cd      | C | 0.04725   | 0.0206 | 0.0033 | 18.878 | 5.3458 | 5.1921 | 5.6762 | 238.3866 |
| B1Cd500   | B | Cd      | C | 0.04725   | 0.0208 | 0.0034 | 17.107 | 5.3145 | 5.1588 | 5.5396 | 252.6669 |
| B1Cd1000  | B | Cd      | D | 0.0945    | 0.0151 | 0.003  | 34.846 | 4.884  | 6.1229 | 3.7019 | 254.5782 |
| B1Cd1000  | B | Cd      | D | 0.0095    | 0.0359 | 0.007  | 38.014 | 4.8727 | 6.1451 | 3.6788 | 233.3572 |
| B1Cd1000  | B | Cd      | D | 0.0945    | 0.031  | 0.0061 | 31.678 | 4.7517 | 6.113  | 3.6723 | 233.0401 |
| B1Cd1000  | B | Cd      | D | 0.0945    | 0.0273 | 0.0054 | 34.887 | 4.8001 | 6.4931 | 3.7085 | 240.3252 |
| B1Cd1000  | B | Cd      | D | 0.0945    | 0.0273 | 0.0054 | 34.804 | 4.8672 | 6.5153 | 3.6887 | 235.1475 |
| B1Cd1000  | B | Cd      | D | 0.0945    | 0.0285 | 0.0056 | 32.706 | 4.7157 | 6.4832 | 3.6953 | 243.166  |
| B1control | B | control | 0 | 0         | 1.3849 | 0.1637 | 29.391 | 1.7918 | 5.1222 | 4.7183 | 237.8634 |
| B1control | B | control | 0 | 0         | 1.2014 | 0.142  | 31.014 | 1.7953 | 4.3559 | 4.9151 | 236.8934 |

|           |   |         |   |      |        |        |          |        |         |        |          |
|-----------|---|---------|---|------|--------|--------|----------|--------|---------|--------|----------|
| B1control | B | control | 0 | 0    | 0.9954 | 0.1176 | 27.768   | 1.7989 | 5.1197  | 4.6877 | 236.8976 |
| B1control | B | control | 0 | 0    | 1.1939 | 0.1411 | 30.74    | 2.0692 | 6.054   | 4.8846 | 237.2181 |
| B1control | B | control | 0 | 0    | 1.1939 | 0.1411 | 28.043   | 2.0804 | 4.5927  | 4.7047 | 220.3076 |
| B1control | B | control | 0 | 0    | 1.2037 | 0.1453 | 28.668   | 2.0621 | 4.5978  | 4.9016 | 246.3967 |
| B1Zn0     | B | Zn      | A | 0.28 | 0.0834 | 0.0102 | 468.568  | 1.3226 | 5.1152  | 4.4614 | 309.6737 |
| B1Zn0     | B | Zn      | A | 0.28 | 0.2026 | 0.0248 | 513.498  | 1.8998 | 5.1378  | 4.4264 | 293.7883 |
| B1Zn0     | B | Zn      | A | 0.28 | 0.191  | 0.0234 | 423.638  | 1.7715 | 5.1052  | 4.3562 | 293.9301 |
| B1Zn0     | B | Zn      | A | 0.28 | 0.159  | 0.0195 | 479.523  | 1.7685 | 4.9875  | 4.7846 | 299.1307 |
| B1Zn0     | B | Zn      | A | 0.28 | 0.159  | 0.0195 | 457.613  | 1.3422 | 5.01    | 4.6543 | 275.7369 |
| B1Zn0     | B | Zn      | A | 0.28 | 0.1615 | 0.0197 | 430.941  | 1.9259 | 4.9775  | 4.5591 | 298.5154 |
| B1Zn2     | B | Zn      | B | 0.56 | 0.1022 | 0.0165 | 750.268  | 2.6728 | 4.7203  | 6.357  | 189.8411 |
| B1Zn2     | B | Zn      | B | 0.56 | 0.0868 | 0.014  | 841.723  | 2.6803 | 4.7428  | 6.367  | 189.6192 |
| B1Zn2     | B | Zn      | B | 0.56 | 0.0974 | 0.0157 | 658.813  | 2.6983 | 4.7103  | 6.3869 | 192.8111 |
| B1Zn2     | B | Zn      | B | 0.56 | 0.0955 | 0.0154 | 769.821  | 2.6364 | 4.4306  | 6.337  | 190.7571 |
| B1Zn2     | B | Zn      | B | 0.56 | 0.0955 | 0.0154 | 730.715  | 2.6274 | 4.453   | 6.3736 | 183.5996 |
| B1Zn2     | B | Zn      | B | 0.56 | 0.0988 | 0.0161 | 671.849  | 2.6239 | 4.4206  | 6.3536 | 204.0568 |
| B1Zn4     | B | Zn      | C | 1.12 | 0.0414 | 0.0118 | 738.775  | 2.55   | 6.836   | 7.1209 | 153.3628 |
| B1Zn4     | B | Zn      | C | 1.12 | 0.0393 | 0.0112 | 833.061  | 2.2874 | 6.8583  | 6.3751 | 153.4766 |
| B1Zn4     | B | Zn      | C | 1.12 | 0.0501 | 0.0142 | 644.49   | 2.6541 | 6.8261  | 6.8038 | 156.6109 |
| B1Zn4     | B | Zn      | C | 1.12 | 0.0436 | 0.0124 | 805.276  | 2.6283 | 6.3751  | 6.8038 | 154.4834 |
| B1Zn4     | B | Zn      | C | 1.12 | 0.0436 | 0.0124 | 672.275  | 2.56   | 6.3974  | 6.7344 | 146.9677 |
| B1Zn4     | B | Zn      | C | 1.12 | 0.0437 | 0.0124 | 688.823  | 2.3167 | 6.3652  | 7.0243 | 166.578  |
| B1Zn10    | B | Zn      | D | 2.8  | 0.025  | 0.0069 | 2089.521 | 5.8738 | 14.9907 | 8.2383 | 88.1468  |
| B1Zn10    | B | Zn      | D | 2.8  | 0.0166 | 0.0045 | 2301.819 | 5.7766 | 15.3084 | 8.0654 | 88.0608  |
| B1Zn10    | B | Zn      | D | 2.8  | 0.0063 | 0.0017 | 1877.223 | 5.8682 | 14.285  | 7.9907 | 89.472   |
| B1Zn10    | B | Zn      | D | 2.8  | 0.016  | 0.0044 | 2142.942 | 5.8804 | 14.2056 | 8.5467 | 88.5599  |
| B1Zn10    | B | Zn      | D | 2.8  | 0.016  | 0.0044 | 2036.1   | 5.8617 | 16.215  | 8.4439 | 87.4512  |
| B1Zn10    | B | Zn      | D | 2.8  | 0.016  | 0.0045 | 1912.837 | 5.7215 | 15.1168 | 8.1495 | 89.7478  |
| M1control | M | control | 0 | 0    | 1.3754 | 0.1659 | 7.096    | 1.7307 | 4.9226  | 4.9936 | 188.2598 |
| M1control | M | control | 0 | 0    | 1.2034 | 0.1451 | 7.43     | 1.7316 | 5.1886  | 4.5164 | 190.2882 |
| M1control | M | control | 0 | 0    | 0.9924 | 0.1197 | 6.762    | 1.7253 | 5.2031  | 5.0226 | 191.4813 |

|           |   |         |   |      |        |        |         |        |         |        |          |
|-----------|---|---------|---|------|--------|--------|---------|--------|---------|--------|----------|
| M1control | M | control | 0 | 0    | 1.19   | 0.1435 | 7.461   | 1.7645 | 4.913   | 4.4874 | 190.0098 |
| M1control | M | control | 0 | 0    | 1.1903 | 0.1436 | 6.731   | 1.7698 | 5.1886  | 5.0097 | 189.779  |
| M1control | M | control | 0 | 0    | 1.2473 | 0.1473 | 6.519   | 1.7664 | 5.3095  | 4.5035 | 205.8039 |
| M1Cu1/2   | M | Cu      | A | 0.13 | 0.0146 | 0.0025 | 22.102  | 2.6711 | 3.8412  | 4.458  | 189.6449 |
| M1Cu1/2   | M | Cu      | A | 0.13 | 0.0184 | 0.0032 | 22.435  | 2.6739 | 3.844   | 4.505  | 197.3402 |
| M1Cu1/2   | M | Cu      | A | 0.13 | 0.0334 | 0.0058 | 21.769  | 2.5977 | 3.8534  | 4.4831 | 192.0883 |
| M1Cu1/2   | M | Cu      | A | 0.13 | 0.0217 | 0.0038 | 22.84   | 2.6358 | 3.7688  | 4.5207 | 184.0387 |
| M1Cu1/2   | M | Cu      | A | 0.13 | 0.022  | 0.0038 | 21.363  | 2.618  | 3.7716  | 4.4518 | 181.1289 |
| M1Cu1/2   | M | Cu      | A | 0.13 | 0.0229 | 0.0039 | 21.277  | 2.5446 | 3.7735  | 4.4831 | 199.4947 |
| M1Cu0     | M | Cu      | B | 0.26 | 0.0013 | 0.0002 | 26.042  | 3.9771 | 4.6368  | 4.1976 | 244.1126 |
| M1Cu0     | M | Cu      | B | 0.26 | 0.0022 | 0.0003 | 31.358  | 3.816  | 4.1659  | 3.4509 | 238.5687 |
| M1Cu0     | M | Cu      | B | 0.26 | 0.0082 | 0.001  | 20.725  | 3.9762 | 4.5386  | 4.2262 | 240.1617 |
| M1Cu0     | M | Cu      | B | 0.26 | 0.0037 | 0.0004 | 28.623  | 4.0033 | 4.5834  | 3.4795 | 240.9477 |
| M1Cu0     | M | Cu      | B | 0.26 | 0.0039 | 0.0005 | 23.46   | 3.8189 | 4.1897  | 4.2135 | 238.0166 |
| M1Cu0     | M | Cu      | B | 0.26 | 0.004  | 0.0005 | 29.004  | 3.7969 | 4.6873  | 3.4668 | 259.7258 |
| M1Cu2.5   | M | Cu      | C | 0.65 | 0.003  | 0.0008 | 34.317  | 4.2886 | 10.5959 | 7.171  | 182.0104 |
| M1Cu2.5   | M | Cu      | C | 0.65 | 0.009  | 0.0023 | 36.233  | 4.3689 | 10.842  | 6.7737 | 182.2707 |
| M1Cu2.5   | M | Cu      | C | 0.65 | 0.0021 | 0.0005 | 32.401  | 4.2984 | 10.6244 | 7.1399 | 188.9054 |
| M1Cu2.5   | M | Cu      | C | 0.65 | 0.0047 | 0.0012 | 35.555  | 4.2637 | 10.5959 | 6.8048 | 184.3955 |
| M1Cu2.5   | M | Cu      | C | 0.65 | 0.0047 | 0.0012 | 33.078  | 4.2819 | 10.5518 | 7.1572 | 167.2327 |
| M1Cu2.5   | M | Cu      | C | 0.65 | 0.0049 | 0.0012 | 31.575  | 4.3756 | 10.886  | 6.791  | 194.3557 |
| M1Cu5     | M | Cu      | D | 1.3  | 0.0111 | 0.0029 | 189.009 | 4.4656 | 14.907  | 7.5763 | 56.5494  |
| M1Cu5     | M | Cu      | D | 1.3  | 0.0021 | 0.0005 | 202.544 | 4.4723 | 14.9427 | 7.5    | 59.6936  |
| M1Cu5     | M | Cu      | D | 1.3  | 0.0021 | 0.0005 | 175.475 | 4.4728 | 14.9117 | 7.57   | 61.9082  |
| M1Cu5     | M | Cu      | D | 1.3  | 0.005  | 0.0013 | 204.71  | 4.4928 | 14.9642 | 7.4841 | 59.7583  |
| M1Cu5     | M | Cu      | D | 1.3  | 0.0051 | 0.0013 | 173.309 | 4.4967 | 14.9928 | 7.5477 | 62.9372  |
| M1Cu5     | M | Cu      | D | 1.3  | 0.0052 | 0.0013 | 165.008 | 4.499  | 14.9761 | 7.465  | 64.8448  |
| M1control | M | control | 0 | 0    | 1.3754 | 0.1659 | 0.359   | 1.7307 | 4.9226  | 4.9936 | 188.2598 |
| M1control | M | control | 0 | 0    | 1.2034 | 0.1451 | 0.319   | 1.7316 | 5.1886  | 4.5164 | 190.2882 |
| M1control | M | control | 0 | 0    | 0.9924 | 0.1197 | 0.399   | 1.7253 | 5.2031  | 5.0226 | 191.4813 |
| M1control | M | control | 0 | 0    | 1.19   | 0.1435 | 0.353   | 1.7645 | 4.913   | 4.4874 | 190.0098 |

|           |   |         |   |       |        |        |          |        |         |         |          |
|-----------|---|---------|---|-------|--------|--------|----------|--------|---------|---------|----------|
| M1control | M | control | 0 | 0     | 1.1903 | 0.1436 | 0.264    | 1.7698 | 5.1886  | 5.0097  | 189.779  |
| M1control | M | control | 0 | 0     | 1.2473 | 0.1473 | 0.302    | 1.7664 | 5.3095  | 4.5035  | 205.8039 |
| M1Pb0     | M | Pb      | A | 0.025 | 0.1094 | 0.0159 | 1.9      | 2.7411 | 5.2978  | 6.5738  | 253.5818 |
| M1Pb0     | M | Pb      | A | 0.025 | 0.3644 | 0.0529 | 2.246    | 2.7671 | 5.8799  | 6.3144  | 253.8755 |
| M1Pb0     | M | Pb      | A | 0.025 | 0.2704 | 0.0392 | 1.554    | 2.7598 | 5.2911  | 6.545   | 251.0684 |
| M1Pb0     | M | Pb      | A | 0.025 | 0.2477 | 0.0359 | 1.929    | 2.6825 | 5.2373  | 6.2856  | 252.8419 |
| M1Pb0     | M | Pb      | A | 0.025 | 0.248  | 0.036  | 1.871    | 2.6796 | 5.8021  | 6.561   | 234.1111 |
| M1Pb0     | M | Pb      | A | 0.025 | 0.2579 | 0.036  | 1.534    | 2.6787 | 5.2949  | 6.3016  | 268.6775 |
| M1Pb10    | M | Pb      | B | 0.25  | 0.0782 | 0.0097 | 169.27   | 2.8443 | 6.3639  | 6.0427  | 204.3807 |
| M1Pb10    | M | Pb      | B | 0.25  | 0.0432 | 0.0054 | 169.968  | 2.8478 | 6.3839  | 6.4097  | 202.4256 |
| M1Pb10    | M | Pb      | B | 0.25  | 0.0192 | 0.0024 | 168.572  | 2.7703 | 6.4339  | 6.0127  | 204.8838 |
| M1Pb10    | M | Pb      | B | 0.25  | 0.0467 | 0.0058 | 182.574  | 2.8073 | 6.3488  | 6.3797  | 203.8967 |
| M1Pb10    | M | Pb      | B | 0.25  | 0.0468 | 0.0058 | 155.966  | 2.7863 | 6.4339  | 6.0294  | 203.0936 |
| M1Pb10    | M | Pb      | B | 0.25  | 0.0487 | 0.0061 | 159.703  | 2.7102 | 6.4765  | 6.3964  | 223.9393 |
| M1Pb50    | M | Pb      | C | 1.25  | 0.0052 | 0.001  | 392      | 5.1253 | 11.6189 | 9.1897  | 199.5415 |
| M1Pb50    | M | Pb      | C | 1.25  | 0.0112 | 0.0022 | 443.962  | 4.7707 | 11.5207 | 8.9455  | 199.4484 |
| M1Pb50    | M | Pb      | C | 1.25  | 0.0152 | 0.003  | 340.038  | 4.9862 | 12.1576 | 9.1578  | 198.7988 |
| M1Pb50    | M | Pb      | C | 1.25  | 0.0103 | 0.0021 | 421.487  | 4.9061 | 11.6481 | 8.9137  | 199.2629 |
| M1Pb50    | M | Pb      | C | 1.25  | 0.0105 | 0.0021 | 362.513  | 5.1354 | 11.8551 | 9.1755  | 194.5797 |
| M1Pb50    | M | Pb      | C | 1.25  | 0.011  | 0.0021 | 320.38   | 4.8195 | 11.8816 | 8.9314  | 200.8985 |
| M1Pb100   | M | Pb      | D | 2.5   | 0.0214 | 0.0044 | 1582     | 8.4229 | 13.9347 | 12.3804 | 89.864   |
| M1Pb100   | M | Pb      | D | 2.5   | 0.0164 | 0.0034 | 1789.846 | 8.4529 | 14.0632 | 12.5303 | 90.1246  |
| M1Pb100   | M | Pb      | D | 2.5   | 0.0094 | 0.0019 | 1374.154 | 8.8694 | 13.94   | 12.4126 | 90.3182  |
| M1Pb100   | M | Pb      | D | 2.5   | 0.0153 | 0.0032 | 1596.641 | 8.8833 | 14.0525 | 12.4982 | 90.1022  |
| M1Pb100   | M | Pb      | D | 2.5   | 0.0156 | 0.0032 | 1567.359 | 8.4047 | 15.0161 | 12.7552 | 85.0197  |
| M1Pb100   | M | Pb      | D | 2.5   | 0.0162 | 0.0032 | 1364.393 | 8.4186 | 14.2398 | 12.5161 | 94.8756  |
| M1control | M | control | 0 | 0     | 1.3754 | 0.1659 | 2.213    | 1.7307 | 4.9226  | 4.9936  | 188.2598 |
| M1control | M | control | 0 | 0     | 1.2034 | 0.1451 | 2.289    | 1.7316 | 5.1886  | 4.5164  | 190.2882 |
| M1control | M | control | 0 | 0     | 0.9924 | 0.1197 | 2.137    | 1.7253 | 5.2031  | 5.0226  | 191.4813 |
| M1control | M | control | 0 | 0     | 1.19   | 0.1435 | 2.428    | 1.7645 | 4.913   | 4.4874  | 190.0098 |
| M1control | M | control | 0 | 0     | 1.1903 | 0.1436 | 1.998    | 1.7698 | 5.1886  | 5.0097  | 189.779  |



|           |   |         |   |       |        |        |        |        |         |         |          |
|-----------|---|---------|---|-------|--------|--------|--------|--------|---------|---------|----------|
| M1control | M | control | 0 | 0     | 1.2473 | 0.1473 | 1.993  | 1.7664 | 5.3095  | 4.5035  | 205.8039 |
| M1Cr0     | M | Cr      | A | 0.036 | 0.3263 | 0.039  | 0.427  | 2.2581 | 6.4926  | 3.9934  | 218.4653 |
| M1Cr0     | M | Cr      | A | 0.036 | 0.7513 | 0.0898 | 0.4179 | 2.2951 | 6.7167  | 3.7274  | 218.3999 |
| M1Cr0     | M | Cr      | A | 0.036 | 0.5273 | 0.063  | 0.37   | 2.0128 | 6.1946  | 4.023   | 225.815  |
| M1Cr0     | M | Cr      | A | 0.036 | 0.5347 | 0.0639 | 0.361  | 2.6704 | 6.6207  | 3.757   | 220.8934 |
| M1Cr0     | M | Cr      | A | 0.036 | 0.5349 | 0.0639 | 0.393  | 2.2773 | 6.2635  | 4.0099  | 205.5525 |
| M1Cr0     | M | Cr      | A | 0.036 | 0.56   | 0.0648 | 0.314  | 2.2956 | 6.5345  | 3.7438  | 228.78   |
| M1Cr5     | M | Cr      | B | 0.18  | 0.0632 | 0.0098 | 3.14   | 1.8608 | 5.5496  | 4.7547  | 211.0797 |
| M1Cr5     | M | Cr      | B | 0.18  | 0.0512 | 0.0079 | 3.193  | 1.8608 | 5.6893  | 4.6986  | 210.9825 |
| M1Cr5     | M | Cr      | B | 0.18  | 0.0642 | 0.01   | 3.087  | 1.8608 | 5.9707  | 4.7813  | 211.8188 |
| M1Cr5     | M | Cr      | B | 0.18  | 0.0593 | 0.0092 | 3.36   | 1.9282 | 5.6671  | 4.672   | 211.2936 |
| M1Cr5     | M | Cr      | B | 0.18  | 0.0595 | 0.0092 | 2.92   | 1.9282 | 5.5629  | 4.7695  | 191.4051 |
| M1Cr5     | M | Cr      | B | 0.18  | 0.0617 | 0.0094 | 2.941  | 1.9282 | 5.809   | 4.6868  | 217.1864 |
| M1Cr10    | M | Cr      | C | 0.36  | 0.0312 | 0.0039 | 4.438  | 1.9196 | 5.9925  | 5.1223  | 218.0863 |
| M1Cr10    | M | Cr      | C | 0.36  | 0.0122 | 0.0015 | 4.5    | 1.7267 | 5.8161  | 5.1529  | 206.4285 |
| M1Cr10    | M | Cr      | C | 0.36  | 0.0072 | 0.0009 | 4.376  | 1.73   | 6.096   | 5.1388  | 217.3153 |
| M1Cr10    | M | Cr      | C | 0.36  | 0.0167 | 0.0021 | 4.712  | 1.7056 | 5.8702  | 5.334   | 213.9434 |
| M1Cr10    | M | Cr      | C | 0.36  | 0.0168 | 0.0021 | 4.164  | 1.9276 | 6.0536  | 5.3857  | 204.59   |
| M1Cr10    | M | Cr      | C | 0.36  | 0.0174 | 0.0022 | 4.193  | 1.9309 | 5.9948  | 5.1717  | 220.4544 |
| M1Cr25    | M | Cr      | D | 0.90  | 0.0573 | 0.015  | 19.345 | 3.8989 | 14.4513 | 10.0318 | 224.6823 |
| M1Cr25    | M | Cr      | D | 0.90  | 0.0463 | 0.0121 | 21.84  | 3.9485 | 13.5448 | 9.9427  | 224.5754 |
| M1Cr25    | M | Cr      | D | 0.90  | 0.0683 | 0.0178 | 14.85  | 4.1126 | 14.2366 | 10.0032 | 226.0176 |
| M1Cr25    | M | Cr      | D | 0.90  | 0.057  | 0.0149 | 21.68  | 4.1479 | 14.6756 | 9.9141  | 225.0918 |
| M1Cr25    | M | Cr      | D | 0.90  | 0.0572 | 0.015  | 17.011 | 3.7199 | 12.2137 | 10.0191 | 224.7524 |
| M1Cr25    | M | Cr      | D | 0.90  | 0.0578 | 0.0155 | 18.294 | 3.7638 | 13.812  | 9.93    | 225.2631 |
| M1control | M | control | 0 | 0     | 1.3754 | 0.1659 | 15.466 | 1.7307 | 4.9226  | 4.9936  | 188.2598 |
| M1control | M | control | 0 | 0     | 1.2034 | 0.1451 | 15.934 | 1.7316 | 5.1886  | 4.5164  | 190.2882 |
| M1control | M | control | 0 | 0     | 0.9924 | 0.1197 | 14.998 | 1.7253 | 5.2031  | 5.0226  | 191.4813 |
| M1control | M | control | 0 | 0     | 1.19   | 0.1435 | 18.253 | 1.7645 | 4.913   | 4.4874  | 190.0098 |
| M1control | M | control | 0 | 0     | 1.1903 | 0.1436 | 12.679 | 1.7698 | 5.1886  | 5.0097  | 189.779  |
| M1control | M | control | 0 | 0     | 1.2473 | 0.1473 | 13.14  | 1.7664 | 5.3095  | 4.5035  | 205.8039 |

|           |   |         |   |           |        |        |          |        |        |         |          |
|-----------|---|---------|---|-----------|--------|--------|----------|--------|--------|---------|----------|
| M1Ni0     | M | Ni      | A | 0.025     | 0.1513 | 0.0195 | 24.255   | 1.9669 | 2.8595 | 4.7824  | 226.3754 |
| M1Ni0     | M | Ni      | A | 0.025     | 0.2373 | 0.0306 | 30.768   | 1.7318 | 3.2072 | 4.9338  | 226.6559 |
| M1Ni0     | M | Ni      | A | 0.025     | 0.1923 | 0.0248 | 23.743   | 1.6358 | 3.2214 | 4.9976  | 236.6469 |
| M1Ni0     | M | Ni      | A | 0.025     | 0.1933 | 0.0249 | 25.3     | 1.9943 | 3.2308 | 5.0828  | 229.8928 |
| M1Ni0     | M | Ni      | A | 0.025     | 0.1936 | 0.025  | 23.211   | 1.5199 | 3.3373 | 5.1537  | 227.2006 |
| M1Ni0     | M | Ni      | A | 0.025     | 0.2007 | 0.0255 | 21.047   | 1.8269 | 3.3136 | 4.8463  | 249.9366 |
| M1Ni5     | M | Ni      | B | 0.125     | 0.0034 | 0.0003 | 38.081   | 2.398  | 4.2512 | 6.5616  | 226.0671 |
| M1Ni5     | M | Ni      | B | 0.125     | 0.0141 | 0.0014 | 44.703   | 2.4346 | 3.5387 | 6.1557  | 221.0062 |
| M1Ni5     | M | Ni      | B | 0.125     | 0.0017 | 0.0002 | 31.46    | 2.4021 | 4.0755 | 6.022   | 223.3107 |
| M1Ni5     | M | Ni      | B | 0.125     | 0.0063 | 0.0006 | 39.012   | 2.4386 | 4.2139 | 6.022   | 223.4614 |
| M1Ni5     | M | Ni      | B | 0.125     | 0.0064 | 0.0006 | 37.15    | 2.4659 | 3.5492 | 6.8625  | 214.2401 |
| M1Ni5     | M | Ni      | B | 0.125     | 0.0064 | 0.0006 | 32.08    | 2.453  | 4.1882 | 6.5473  | 224.2695 |
| M1Ni10    | M | Ni      | C | 0.25      | 0.009  | 0.0013 | 68.681   | 4.1371 | 7.1711 | 8.0769  | 203.6387 |
| M1Ni10    | M | Ni      | C | 0.25      | 0.012  | 0.0018 | 85.446   | 4.1356 | 7.1103 | 8.087   | 194.5838 |
| M1Ni10    | M | Ni      | C | 0.25      | 0.01   | 0.0015 | 61.916   | 4.1311 | 7.1179 | 7.915   | 197.5565 |
| M1Ni10    | M | Ni      | C | 0.25      | 0.0103 | 0.0015 | 73.356   | 4.1569 | 7.6139 | 7.9757  | 198.593  |
| M1Ni10    | M | Ni      | C | 0.25      | 0.0103 | 0.0015 | 64.006   | 4.1594 | 8.8537 | 7.1559  | 179.6189 |
| M1Ni10    | M | Ni      | C | 0.25      | 0.0105 | 0.0016 | 65.033   | 4.1508 | 8.8411 | 7.247   | 213.2755 |
| M1Ni25    | M | Ni      | D | 0.625     | 0.0103 | 0.0018 | 320.7275 | 5.6424 | 8.2097 | 11.3963 | 105.4891 |
| M1Ni25    | M | Ni      | D | 0.625     | 0.0033 | 0.0006 | 383.5462 | 5.2336 | 8.1475 | 11.2535 | 106.0036 |
| M1Ni25    | M | Ni      | D | 0.625     | 0.0008 | 0.0001 | 257.9088 | 5.6452 | 8.1336 | 11.2811 | 110.784  |
| M1Ni25    | M | Ni      | D | 0.625     | 0.0045 | 0.0008 | 326.2447 | 4.6848 | 8.3802 | 11.553  | 107.4256 |
| M1Ni25    | M | Ni      | D | 0.625     | 0.0047 | 0.0008 | 315.2103 | 5.2797 | 9.8525 | 11.7189 | 96.8428  |
| M1Ni25    | M | Ni      | D | 0.625     | 0.0047 | 0.0009 | 261.5869 | 5.6382 | 9.8664 | 11.9217 | 112.2711 |
| M1control | M | control | 0 | 0         | 1.3754 | 0.1659 | 0.684    | 1.7307 | 1.9226 | 4.9936  | 188.2598 |
| M1control | M | control | 0 | 0         | 1.2034 | 0.1451 | 0.508    | 1.7316 | 2.1886 | 4.5164  | 190.2882 |
| M1control | M | control | 0 | 0         | 0.9924 | 0.1197 | 0.676    | 1.7253 | 2.2031 | 5.0226  | 191.4813 |
| M1control | M | control | 0 | 0         | 1.19   | 0.1435 | 0.624    | 1.7645 | 1.913  | 4.4874  | 190.0098 |
| M1control | M | control | 0 | 0         | 1.1903 | 0.1436 | 0.543    | 1.7698 | 2.1886 | 5.0097  | 189.779  |
| M1control | M | control | 0 | 0         | 1.2473 | 0.1473 | 0.492    | 1.7664 | 2.3095 | 4.5035  | 205.8039 |
| M1Cd0     | M | Cd      | A | 0.0000945 | 0.0163 | 0.0018 | 0.732    | 2.3716 | 2.0185 | 2.5678  | 203.1726 |

|           |   |         |   |           |        |        |         |        |        |        |          |
|-----------|---|---------|---|-----------|--------|--------|---------|--------|--------|--------|----------|
| M1Cd0     | M | Cd      | A | 0.0000945 | 0.3543 | 0.039  | 0.84    | 2.495  | 1.9959 | 2.7939 | 207.1028 |
| M1Cd0     | M | Cd      | A | 0.0000945 | 0.6743 | 0.0742 | 0.624   | 2.54   | 1.9869 | 2.5407 | 208.1347 |
| M1Cd0     | M | Cd      | A | 0.0000945 | 0.348  | 0.0383 | 0.827   | 2.4193 | 2.4571 | 2.7667 | 206.1367 |
| M1Cd0     | M | Cd      | A | 0.0000945 | 0.3482 | 0.0383 | 0.637   | 2.5016 | 2.4684 | 2.5558 | 204.5327 |
| M1Cd0     | M | Cd      | A | 0.0000945 | 0.3583 | 0.0384 | 0.688   | 2.5389 | 2.4412 | 2.7818 | 221.6421 |
| M1Cd100   | M | Cd      | B | 0.00945   | 0.0564 | 0.0055 | 73.789  | 1.3198 | 2.905  | 2.1446 | 216.2476 |
| M1Cd100   | M | Cd      | B | 0.00945   | 0.0824 | 0.0081 | 74.073  | 1.5226 | 2.9818 | 2.1601 | 216.0658 |
| M1Cd100   | M | Cd      | B | 0.00945   | 0.1794 | 0.0176 | 73.505  | 1.3822 | 2.898  | 2.1167 | 215.1713 |
| M1Cd100   | M | Cd      | B | 0.00945   | 0.1057 | 0.0104 | 74.784  | 1.4753 | 3.0214 | 2.1322 | 215.8282 |
| M1Cd100   | M | Cd      | B | 0.00945   | 0.106  | 0.0104 | 72.793  | 1.3152 | 2.9679 | 2.1322 | 206.4991 |
| M1Cd100   | M | Cd      | B | 0.00945   | 0.1085 | 0.0105 | 74.168  | 1.4921 | 3.0214 | 2.1477 | 229.3376 |
| M1Cd500   | M | Cd      | C | 0.04725   | 0.0151 | 0.0017 | 118.624 | 1.5014 | 2.7236 | 2.8141 | 160.273  |
| M1Cd500   | M | Cd      | C | 0.04725   | 0.0161 | 0.0019 | 137.934 | 1.7106 | 2.851  | 2.8333 | 160.1642 |
| M1Cd500   | M | Cd      | C | 0.04725   | 0.0201 | 0.0023 | 99.313  | 1.6101 | 2.8269 | 2.8429 | 165.4916 |
| M1Cd500   | M | Cd      | C | 0.04725   | 0.017  | 0.002  | 114.269 | 1.599  | 2.7019 | 2.8622 | 161.9763 |
| M1Cd500   | M | Cd      | C | 0.04725   | 0.0171 | 0.002  | 92.978  | 1.4935 | 2.7284 | 2.8301 | 161.2095 |
| M1Cd500   | M | Cd      | C | 0.04725   | 0.0172 | 0.002  | 116.41  | 1.7043 | 2.7764 | 2.8494 | 167.7099 |
| M1Cd1000  | M | Cd      | D | 0.0945    | 0.0113 | 0.002  | 168.624 | 1.4115 | 4.6546 | 3.9543 | 108.7095 |
| M1Cd1000  | M | Cd      | D | 0.0095    | 0.0413 | 0.0075 | 145.245 | 1.0061 | 4.4933 | 3.8178 | 108.9975 |
| M1Cd1000  | M | Cd      | D | 0.0945    | 0.0343 | 0.0062 | 132.004 | 1.284  | 4.8772 | 3.9236 | 110.9742 |
| M1Cd1000  | M | Cd      | D | 0.0945    | 0.0287 | 0.0052 | 171.298 | 1.2973 | 4.7006 | 3.7871 | 109.5604 |
| M1Cd1000  | M | Cd      | D | 0.0945    | 0.0289 | 0.0052 | 145.95  | 1.3976 | 4.6929 | 3.9406 | 99.8641  |
| M1Cd1000  | M | Cd      | D | 0.0945    | 0.0294 | 0.0054 | 127.12  | 0.9928 | 4.5496 | 3.8042 | 118.6866 |
| M1control | M | control | 0 | 0         | 1.3754 | 0.1659 | 39.814  | 1.7307 | 4.9226 | 4.9936 | 188.2598 |
| M1control | M | control | 0 | 0         | 1.2034 | 0.1451 | 41.094  | 1.7316 | 5.1886 | 4.5164 | 190.2882 |
| M1control | M | control | 0 | 0         | 0.9924 | 0.1197 | 38.534  | 1.7253 | 5.2031 | 5.0226 | 191.4813 |
| M1control | M | control | 0 | 0         | 1.19   | 0.1435 | 40.446  | 1.7645 | 4.913  | 4.4874 | 190.0098 |
| M1control | M | control | 0 | 0         | 1.1903 | 0.1436 | 39.182  | 1.7698 | 5.1886 | 5.0097 | 189.779  |
| M1control | M | control | 0 | 0         | 1.2473 | 0.1473 | 38.955  | 1.7664 | 5.3095 | 4.5035 | 205.8039 |
| M1Zn0     | M | Zn      | A | 0.28      | 0.0683 | 0.008  | 549.538 | 1.2058 | 6.8377 | 3.3266 | 266.9789 |
| M1Zn0     | M | Zn      | A | 0.28      | 0.2503 | 0.0292 | 603.425 | 0.9707 | 7.4191 | 3.2432 | 267.6546 |

|           |   |         |   |      |        |        |         |        |         |        |          |
|-----------|---|---------|---|------|--------|--------|---------|--------|---------|--------|----------|
| M1Zn0     | M | Zn      | A | 0.28 | 0.1883 | 0.0219 | 495.652 | 1.1759 | 7.4317  | 3.2659 | 272.6303 |
| M1Zn0     | M | Zn      | A | 0.28 | 0.1687 | 0.0196 | 558.227 | 1.1628 | 7.4317  | 3.6047 | 269.0879 |
| M1Zn0     | M | Zn      | A | 0.28 | 0.1689 | 0.0197 | 540.849 | 1.1921 | 6.8099  | 3.367  | 245.0221 |
| M1Zn0     | M | Zn      | A | 0.28 | 0.1748 | 0.0204 | 501.444 | 1.0015 | 7.3635  | 3.0814 | 271.1413 |
| M1Zn2     | M | Zn      | B | 0.56 | 0.1032 | 0.0143 | 862.961 | 1.5728 | 8.3991  | 3.4491 | 146.7255 |
| M1Zn2     | M | Zn      | B | 0.56 | 0.0932 | 0.0129 | 962.39  | 1.8601 | 8.3563  | 3.4657 | 147.0479 |
| M1Zn2     | M | Zn      | B | 0.56 | 0.0962 | 0.0133 | 763.531 | 1.7103 | 8.9439  | 3.2564 | 149.3669 |
| M1Zn2     | M | Zn      | B | 0.56 | 0.0973 | 0.0135 | 882.774 | 1.7355 | 8.8392  | 3.4134 | 147.7134 |
| M1Zn2     | M | Zn      | B | 0.56 | 0.0975 | 0.0135 | 843.147 | 1.5347 | 8.4396  | 3.1993 | 141.4312 |
| M1Zn2     | M | Zn      | B | 0.56 | 0.1022 | 0.0142 | 776.741 | 1.813  | 8.4087  | 3.2374 | 160.5438 |
| M1Zn4     | M | Zn      | C | 1.12 | 0.0353 | 0.0105 | 779.756 | 2.1931 | 11.7256 | 6.1471 | 130.2839 |
| M1Zn4     | M | Zn      | C | 1.12 | 0.0433 | 0.0129 | 876.366 | 2.077  | 11.6554 | 6.0842 | 130.7257 |
| M1Zn4     | M | Zn      | C | 1.12 | 0.0483 | 0.0143 | 683.147 | 2.0697 | 11.7352 | 5.8712 | 133.6078 |
| M1Zn4     | M | Zn      | C | 1.12 | 0.042  | 0.0125 | 841.299 | 2.0857 | 11.5731 | 6.3529 | 131.5391 |
| M1Zn4     | M | Zn      | C | 1.12 | 0.0422 | 0.0126 | 718.213 | 2.1839 | 11.7522 | 6.3238 | 119.6802 |
| M1Zn4     | M | Zn      | C | 1.12 | 0.0439 | 0.0131 | 724.175 | 2.0707 | 11.7352 | 5.9414 | 134.7695 |
| M1Zn10    | M | Zn      | D | 2.8  | 0.0152 | 0.0043 | 866.48  | 3.0967 | 16.6458 | 8.9404 | 71.1039  |
| M1Zn10    | M | Zn      | D | 2.8  | 0.0192 | 0.0055 | 953.436 | 3.7129 | 16.6107 | 8.6147 | 71.3753  |
| M1Zn10    | M | Zn      | D | 2.8  | 0.0243 | 0.0069 | 679.523 | 3.237  | 17.0441 | 8.4018 | 72.5071  |
| M1Zn10    | M | Zn      | D | 2.8  | 0.0194 | 0.0055 | 872.576 | 3.25   | 16.8763 | 8.7901 | 71.6621  |
| M1Zn10    | M | Zn      | D | 2.8  | 0.0195 | 0.0056 | 860.384 | 3.0767 | 16.6182 | 8.8327 | 67.7806  |
| M1Zn10    | M | Zn      | D | 2.8  | 0.0196 | 0.0057 | 683.587 | 3.6804 | 16.7209 | 8.73   | 78.1805  |
| N1control | N | control | 0 | 0    | 1.1002 | 0.17   | 3.773   | 1.4669 | 6.7682  | 3.8385 | 205.132  |
| N1control | N | control | 0 | 0    | 0.9827 | 0.1518 | 4.045   | 1.4524 | 6.7775  | 3.9256 | 207.41   |
| N1control | N | control | 0 | 0    | 1.0525 | 0.1626 | 3.501   | 1.4598 | 6.7812  | 3.8385 | 209.6863 |
| N1control | N | control | 0 | 0    | 1.0451 | 0.1615 | 4.039   | 1.4691 | 6.8818  | 3.9282 | 207.4095 |
| N1control | N | control | 0 | 0    | 1.0451 | 0.1615 | 3.507   | 1.4531 | 6.8901  | 3.8122 | 192.9186 |
| N1control | N | control | 0 | 0    | 1.0477 | 0.1616 | 3.679   | 1.4623 | 6.8873  | 3.9071 | 210.5805 |
| N1Cu1/2   | N | Cu      | A | 0.13 | 0.0239 | 0.0035 | 5.043   | 1.4105 | 7.7964  | 3.697  | 190.2515 |
| N1Cu1/2   | N | Cu      | A | 0.13 | 0.0033 | 0.0005 | 5.252   | 1.4115 | 7.8064  | 3.7282 | 183.7073 |
| N1Cu1/2   | N | Cu      | A | 0.13 | 0.0115 | 0.0017 | 4.834   | 1.4138 | 7.8034  | 3.7168 | 197.5748 |

|           |   |         |   |       |        |        |         |        |         |        |          |
|-----------|---|---------|---|-------|--------|--------|---------|--------|---------|--------|----------|
| N1Cu1/2   | N | Cu      | A | 0.13  | 0.0129 | 0.0019 | 5.286   | 1.4403 | 7.8073  | 3.7083 | 190.4064 |
| N1Cu1/2   | N | Cu      | A | 0.13  | 0.0129 | 0.0019 | 4.801   | 1.4409 | 7.8183  | 3.68   | 179.9286 |
| N1Cu1/2   | N | Cu      | A | 0.13  | 0.0134 | 0.0019 | 4.996   | 1.4439 | 7.8153  | 3.6998 | 203.4847 |
| N1Cu0     | N | Cu      | B | 0.26  | 0.0012 | 0.0002 | 11.84   | 1.3945 | 8.1627  | 3.3503 | 221.4374 |
| N1Cu0     | N | Cu      | B | 0.26  | 0.0007 | 0.0001 | 12.2    | 1.4444 | 8.1706  | 2.9082 | 221.0823 |
| N1Cu0     | N | Cu      | B | 0.26  | 0.001  | 0.0001 | 11.48   | 1.4196 | 8.1696  | 3.3872 | 226.293  |
| N1Cu0     | N | Cu      | B | 0.26  | 0.001  | 0.0001 | 13.182  | 1.3962 | 8.1052  | 2.9365 | 222.9376 |
| N1Cu0     | N | Cu      | B | 0.26  | 0.001  | 0.0001 | 10.497  | 1.4468 | 8.1121  | 3.3447 | 212.8025 |
| N1Cu0     | N | Cu      | B | 0.26  | 0.001  | 0.0001 | 12.374  | 1.4216 | 8.1171  | 2.8968 | 225.075  |
| N1Cu2.5   | N | Cu      | C | 0.65  | 0.0011 | 0.0002 | 22.675  | 1.4701 | 7.9586  | 3.0695 | 203.399  |
| N1Cu2.5   | N | Cu      | C | 0.65  | 0.0009 | 0.0003 | 23.337  | 1.5209 | 7.9661  | 2.9324 | 203.4315 |
| N1Cu2.5   | N | Cu      | C | 0.65  | 0.0008 | 0.0002 | 22.013  | 1.498  | 7.9605  | 3.0722 | 203.5758 |
| N1Cu2.5   | N | Cu      | C | 0.65  | 0.0007 | 0.0002 | 25.415  | 1.4719 | 8.1223  | 2.9243 | 203.4688 |
| N1Cu2.5   | N | Cu      | C | 0.65  | 0.0009 | 0.0002 | 19.936  | 1.5212 | 8.1308  | 3.0426 | 187.8408 |
| N1Cu2.5   | N | Cu      | C | 0.65  | 0.0009 | 0.0002 | 23.84   | 1.4986 | 8.1383  | 2.9217 | 214.2905 |
| N1Cu5     | N | Cu      | D | 1.3   | 0.0004 | 0.0001 | 241.268 | 3.3833 | 10.8166 | 8.9224 | 128.0919 |
| N1Cu5     | N | Cu      | D | 1.3   | 0.0006 | 0.0001 | 242.959 | 3.7269 | 10.8175 | 8.7056 | 125.6997 |
| N1Cu5     | N | Cu      | D | 1.3   | 0.0009 | 0.0002 | 239.577 | 3.5586 | 10.8248 | 8.9457 | 132.8081 |
| N1Cu5     | N | Cu      | D | 1.3   | 0.0006 | 0.0001 | 257.104 | 3.3848 | 10.4634 | 8.7237 | 128.8666 |
| N1Cu5     | N | Cu      | D | 1.3   | 0.0006 | 0.0001 | 225.431 | 3.7275 | 10.4706 | 8.9018 | 120.3093 |
| N1Cu5     | N | Cu      | D | 1.3   | 0.0007 | 0.0001 | 250.134 | 3.5601 | 10.4652 | 8.6876 | 129.9197 |
| N1control | N | control | 0 | 0     | 1.1002 | 0.17   | 1.108   | 1.4669 | 6.7682  | 3.8385 | 205.132  |
| N1control | N | control | 0 | 0     | 0.9827 | 0.1518 | 1.133   | 1.4524 | 6.7775  | 3.9256 | 207.41   |
| N1control | N | control | 0 | 0     | 1.0525 | 0.1626 | 1.083   | 1.4598 | 6.7812  | 3.8385 | 209.6863 |
| N1control | N | control | 0 | 0     | 1.0451 | 0.1615 | 1.241   | 1.4691 | 6.8818  | 3.9282 | 207.4095 |
| N1control | N | control | 0 | 0     | 1.0451 | 0.1615 | 0.976   | 1.4531 | 6.8901  | 3.8122 | 192.9186 |
| N1control | N | control | 0 | 0     | 1.0477 | 0.1616 | 1.172   | 1.4623 | 6.8873  | 3.9071 | 210.5805 |
| N1Pb0     | N | Pb      | A | 0.025 | 0.9367 | 0.1988 | 0.989   | 2.0065 | 6.5177  | 5.3571 | 201.5578 |
| N1Pb0     | N | Pb      | A | 0.025 | 0.4463 | 0.0947 | 1.064   | 2.0757 | 6.5228  | 5.2727 | 201.6867 |
| N1Pb0     | N | Pb      | A | 0.025 | 0.5676 | 0.1205 | 0.914   | 2.0431 | 6.5245  | 5.3644 | 202.7714 |
| N1Pb0     | N | Pb      | A | 0.025 | 0.6502 | 0.138  | 1.092   | 2.0084 | 6.8767  | 5.2968 | 202.0053 |

|           |   |         |   |       |        |        |          |        |        |        |          |
|-----------|---|---------|---|-------|--------|--------|----------|--------|--------|--------|----------|
| N1Pb0     | N | Pb      | A | 0.025 | 0.6502 | 0.138  | 0.887    | 2.0777 | 6.8843 | 5.3378 | 186.0825 |
| N1Pb0     | N | Pb      | A | 0.025 | 0.6788 | 0.1436 | 0.983    | 2.0442 | 6.8826 | 5.2606 | 203.1734 |
| N1Pb10    | N | Pb      | B | 0.25  | 0.0449 | 0.0067 | 27.131   | 2.3117 | 8.3053 | 6.1941 | 199.2911 |
| N1Pb10    | N | Pb      | B | 0.25  | 0.0399 | 0.0059 | 27.148   | 2.3368 | 8.3101 | 6.2759 | 199.6237 |
| N1Pb10    | N | Pb      | B | 0.25  | 0.0295 | 0.0044 | 27.114   | 2.3273 | 8.3111 | 6.2105 | 204.3446 |
| N1Pb10    | N | Pb      | B | 0.25  | 0.0381 | 0.0057 | 28.547   | 2.313  | 7.7147 | 6.2732 | 201.0865 |
| N1Pb10    | N | Pb      | B | 0.25  | 0.0381 | 0.0057 | 25.716   | 2.3375 | 7.7176 | 6.1832 | 185.2876 |
| N1Pb10    | N | Pb      | B | 0.25  | 0.0394 | 0.0058 | 28.058   | 2.3276 | 7.7156 | 6.2486 | 219.6845 |
| N1Pb50    | N | Pb      | C | 1.25  | 0.0096 | 0.0019 | 245.782  | 1.5964 | 7.0982 | 3.7571 | 199.6957 |
| N1Pb50    | N | Pb      | C | 1.25  | 0.0043 | 0.0008 | 246.508  | 1.7338 | 7.0982 | 3.7474 | 193.8567 |
| N1Pb50    | N | Pb      | C | 1.25  | 0.0038 | 0.0007 | 245.056  | 1.6678 | 7.1075 | 3.7498 | 201.245  |
| N1Pb50    | N | Pb      | C | 1.25  | 0.0059 | 0.0011 | 264.73   | 1.5981 | 7.4428 | 3.7886 | 198.2658 |
| N1Pb50    | N | Pb      | C | 1.25  | 0.0059 | 0.0011 | 226.834  | 1.7361 | 7.4513 | 3.7378 | 191.638  |
| N1Pb50    | N | Pb      | C | 1.25  | 0.0061 | 0.0012 | 257.688  | 1.6698 | 7.4564 | 3.7426 | 214.1936 |
| N1Pb100   | N | Pb      | D | 2.5   | 0.0011 | 0.0002 | 983.2    | 1.5733 | 8.9846 | 4.3777 | 179.8746 |
| N1Pb100   | N | Pb      | D | 2.5   | 0.0037 | 0.0007 | 983.72   | 1.7788 | 8.9873 | 4.4761 | 180.4573 |
| N1Pb100   | N | Pb      | D | 2.5   | 0.0035 | 0.0007 | 982.68   | 1.6769 | 8.9882 | 4.4165 | 181.2841 |
| N1Pb100   | N | Pb      | D | 2.5   | 0.0028 | 0.0006 | 1100.352 | 1.5757 | 8.8123 | 4.4942 | 180.5387 |
| N1Pb100   | N | Pb      | D | 2.5   | 0.0028 | 0.0006 | 866.044  | 1.7806 | 8.8214 | 4.3725 | 178.371  |
| N1Pb100   | N | Pb      | D | 2.5   | 0.0029 | 0.0006 | 904.576  | 1.6769 | 8.8241 | 4.4528 | 192.5074 |
| N1control | N | control | 0 | 0     | 1.1002 | 0.17   | 0.248    | 1.4669 | 6.7682 | 3.8385 | 205.132  |
| N1control | N | control | 0 | 0     | 0.9827 | 0.1518 | 0.217    | 1.4524 | 6.7775 | 3.9256 | 207.41   |
| N1control | N | control | 0 | 0     | 1.0525 | 0.1626 | 0.259    | 1.4598 | 6.7812 | 3.8385 | 209.6863 |
| N1control | N | control | 0 | 0     | 1.0451 | 0.1615 | 0.266    | 1.4691 | 6.8818 | 3.9282 | 207.4095 |
| N1control | N | control | 0 | 0     | 1.0451 | 0.1615 | 0.211    | 1.4531 | 6.8901 | 3.8122 | 192.9186 |
| N1control | N | control | 0 | 0     | 1.0477 | 0.1616 | 0.214    | 1.4623 | 6.8873 | 3.9071 | 210.5805 |
| N1Cr0     | N | Cr      | A | 0.036 | 0.0752 | 0.0086 | 1.55     | 2.2343 | 7.1553 | 2.2031 | 222.5209 |
| N1Cr0     | N | Cr      | A | 0.036 | 0.2067 | 0.0235 | 1.58     | 2.2014 | 7.1589 | 2.3621 | 221.6588 |
| N1Cr0     | N | Cr      | A | 0.036 | 0.0768 | 0.0087 | 1.52     | 2.2208 | 7.1724 | 2.2083 | 225.1014 |
| N1Cr0     | N | Cr      | A | 0.036 | 0.1196 | 0.0136 | 1.809    | 2.2352 | 6.4031 | 2.3519 | 223.0937 |
| N1Cr0     | N | Cr      | A | 0.036 | 0.1196 | 0.0136 | 1.291    | 2.2014 | 6.4093 | 2.198  | 218.9022 |

|           |   |         |   |       |        |        |        |        |         |        |          |
|-----------|---|---------|---|-------|--------|--------|--------|--------|---------|--------|----------|
| N1Cr0     | N | Cr      | A | 0.036 | 0.1249 | 0.014  | 1.347  | 2.2211 | 6.4093  | 2.3391 | 224.0356 |
| N1Cr5     | N | Cr      | B | 0.18  | 0.0448 | 0.0073 | 2.75   | 2.8174 | 7.1504  | 2.7938 | 191.4531 |
| N1Cr5     | N | Cr      | B | 0.18  | 0.0972 | 0.0159 | 2.771  | 2.7637 | 7.1562  | 2.7166 | 183.4475 |
| N1Cr5     | N | Cr      | B | 0.18  | 0.0536 | 0.0087 | 2.729  | 2.7949 | 7.163   | 2.802  | 197.2065 |
| N1Cr5     | N | Cr      | B | 0.18  | 0.0652 | 0.0106 | 3.015  | 2.8184 | 7.2883  | 2.7139 | 190.7024 |
| N1Cr5     | N | Cr      | B | 0.18  | 0.0652 | 0.0106 | 2.486  | 2.765  | 7.2922  | 2.769  | 172.0433 |
| N1Cr5     | N | Cr      | B | 0.18  | 0.0684 | 0.011  | 2.553  | 2.7952 | 7.3086  | 2.6918 | 195.2958 |
| N1Cr10    | N | Cr      | C | 0.36  | 0.0055 | 0.001  | 2.871  | 2.6489 | 9.7523  | 2.6393 | 220.2714 |
| N1Cr10    | N | Cr      | C | 0.36  | 0.0094 | 0.0017 | 2.893  | 2.5894 | 9.7603  | 2.9718 | 214.5111 |
| N1Cr10    | N | Cr      | C | 0.36  | 0.0215 | 0.0039 | 2.849  | 2.6222 | 9.7673  | 2.6651 | 220.8109 |
| N1Cr10    | N | Cr      | C | 0.36  | 0.0121 | 0.0022 | 2.995  | 2.6513 | 9.2467  | 2.9976 | 218.5312 |
| N1Cr10    | N | Cr      | C | 0.36  | 0.0121 | 0.0022 | 2.746  | 2.5908 | 9.2578  | 2.6107 | 207.1642 |
| N1Cr10    | N | Cr      | C | 0.36  | 0.0127 | 0.0023 | 2.766  | 2.6239 | 9.2477  | 2.9431 | 232.5463 |
| N1Cr25    | N | Cr      | D | 0.90  | 0.0231 | 0.0047 | 7.819  | 2.7344 | 10.0943 | 5.6893 | 195.9682 |
| N1Cr25    | N | Cr      | D | 0.90  | 0.006  | 0.0012 | 7.868  | 3.633  | 10.0962 | 5.9836 | 202.861  |
| N1Cr25    | N | Cr      | D | 0.90  | 0.0258 | 0.0053 | 7.77   | 3.1863 | 10.1088 | 5.7393 | 195.9817 |
| N1Cr25    | N | Cr      | D | 0.90  | 0.0183 | 0.0037 | 8.093  | 2.737  | 10.1953 | 6.0197 | 198.2703 |
| N1Cr25    | N | Cr      | D | 0.90  | 0.0183 | 0.0037 | 7.545  | 3.6339 | 10.1992 | 5.6837 | 187.8056 |
| N1Cr25    | N | Cr      | D | 0.90  | 0.0187 | 0.0038 | 7.588  | 3.1885 | 10.2148 | 5.9642 | 217.0864 |
| N1control | N | control | 0 | 0     | 1.1002 | 0.17   | 1.476  | 1.4669 | 6.7682  | 3.8385 | 205.132  |
| N1control | N | control | 0 | 0     | 0.9827 | 0.1518 | 1.576  | 1.4524 | 6.7775  | 3.9256 | 207.41   |
| N1control | N | control | 0 | 0     | 1.0525 | 0.1626 | 1.376  | 1.4598 | 6.7812  | 3.8385 | 209.6863 |
| N1control | N | control | 0 | 0     | 1.0451 | 0.1615 | 1.592  | 1.4691 | 6.8818  | 3.9282 | 207.4095 |
| N1control | N | control | 0 | 0     | 1.0451 | 0.1615 | 1.359  | 1.4531 | 6.8901  | 3.8122 | 192.9186 |
| N1control | N | control | 0 | 0     | 1.0477 | 0.1616 | 1.298  | 1.4623 | 6.8873  | 3.9071 | 210.5805 |
| N1Ni0     | N | Ni      | A | 0.025 | 0.2149 | 0.0249 | 9.867  | 1.6154 | 6.8     | 3.6444 | 235.8319 |
| N1Ni0     | N | Ni      | A | 0.025 | 0.3117 | 0.0361 | 10.067 | 1.6201 | 6.808   | 3.4489 | 233.0011 |
| N1Ni0     | N | Ni      | A | 0.025 | 0.3424 | 0.0396 | 9.667  | 1.619  | 6.8133  | 3.6343 | 237.1401 |
| N1Ni0     | N | Ni      | A | 0.025 | 0.2897 | 0.0335 | 9.903  | 1.616  | 6.7831  | 3.4895 | 235.3244 |
| N1Ni0     | N | Ni      | A | 0.025 | 0.2897 | 0.0335 | 9.83   | 1.6204 | 6.7867  | 3.6317 | 234.2604 |
| N1Ni0     | N | Ni      | A | 0.025 | 0.2947 | 0.0347 | 9.642  | 1.621  | 6.7884  | 3.4463 | 247.9634 |

|           |   |         |   |           |        |        |        |        |        |        |          |
|-----------|---|---------|---|-----------|--------|--------|--------|--------|--------|--------|----------|
| N1Ni5     | N | Ni      | B | 0.125     | 0.0449 | 0.0056 | 25.47  | 2.6044 | 7.1591 | 6.4676 | 195.7175 |
| N1Ni5     | N | Ni      | B | 0.125     | 0.0445 | 0.0056 | 26.235 | 2.6223 | 7.1647 | 6.1398 | 194.1259 |
| N1Ni5     | N | Ni      | B | 0.125     | 0.0361 | 0.0045 | 24.705 | 2.6161 | 7.1665 | 6.4834 | 200.7363 |
| N1Ni5     | N | Ni      | B | 0.125     | 0.0418 | 0.0052 | 27.539 | 2.6059 | 7.062  | 6.1504 | 196.8599 |
| N1Ni5     | N | Ni      | B | 0.125     | 0.0418 | 0.0052 | 23.401 | 2.6241 | 7.0648 | 6.4517 | 178.4052 |
| N1Ni5     | N | Ni      | B | 0.125     | 0.0433 | 0.0053 | 23.326 | 2.617  | 7.0731 | 6.1398 | 208.8991 |
| N1Ni10    | N | Ni      | C | 0.25      | 0.0345 | 0.0045 | 51.851 | 2.1752 | 7.519  | 5.5737 | 184.9425 |
| N1Ni10    | N | Ni      | C | 0.25      | 0.0142 | 0.0019 | 51.957 | 2.2108 | 7.519  | 5.6825 | 183.5937 |
| N1Ni10    | N | Ni      | C | 0.25      | 0.0217 | 0.0029 | 51.745 | 2.1962 | 7.5237 | 5.6029 | 187.994  |
| N1Ni10    | N | Ni      | C | 0.25      | 0.0235 | 0.0031 | 54.587 | 2.177  | 7.9777 | 5.6878 | 185.5101 |
| N1Ni10    | N | Ni      | C | 0.25      | 0.0235 | 0.0031 | 49.116 | 2.212  | 7.9786 | 5.5578 | 175.5178 |
| N1Ni10    | N | Ni      | C | 0.25      | 0.0246 | 0.0032 | 49.922 | 2.1984 | 7.9833 | 5.6586 | 186.4576 |
| N1Ni25    | N | Ni      | D | 0.625     | 0.0074 | 0.0012 | 55.915 | 1.9684 | 7.8939 | 4.9747 | 180.6169 |
| N1Ni25    | N | Ni      | D | 0.625     | 0.0024 | 0.0004 | 56.042 | 2.107  | 7.8999 | 5.0659 | 176.775  |
| N1Ni25    | N | Ni      | D | 0.625     | 0.019  | 0.0032 | 55.788 | 2.0397 | 7.9051 | 4.9624 | 185.7599 |
| N1Ni25    | N | Ni      | D | 0.625     | 0.0096 | 0.0016 | 56.758 | 1.9692 | 8.3175 | 5.0684 | 181.0506 |
| N1Ni25    | N | Ni      | D | 0.625     | 0.0096 | 0.0016 | 55.073 | 2.1076 | 8.3279 | 4.9501 | 166.5402 |
| N1Ni25    | N | Ni      | D | 0.625     | 0.0101 | 0.0016 | 55.227 | 2.0411 | 8.3244 | 5.0561 | 195.9673 |
| N1control | N | control | 0 | 0         | 1.1002 | 0.17   | 1.382  | 1.4669 | 6.7682 | 3.8385 | 205.132  |
| N1control | N | control | 0 | 0         | 0.9827 | 0.1518 | 1.418  | 1.4524 | 6.7775 | 3.9256 | 207.41   |
| N1control | N | control | 0 | 0         | 1.0525 | 0.1626 | 1.346  | 1.4598 | 6.7812 | 3.8385 | 209.6863 |
| N1control | N | control | 0 | 0         | 1.0451 | 0.1615 | 1.515  | 1.4691 | 6.8818 | 3.9282 | 207.4095 |
| N1control | N | control | 0 | 0         | 1.0451 | 0.1615 | 1.248  | 1.4531 | 6.8901 | 3.8122 | 192.9186 |
| N1control | N | control | 0 | 0         | 1.0477 | 0.1616 | 1.257  | 1.4623 | 6.8873 | 3.9071 | 210.5805 |
| N1Cd0     | N | Cd      | A | 0.0000945 | 0.7106 | 0.1071 | 1.593  | 1.8077 | 7.1083 | 0.7175 | 229.2065 |
| N1Cd0     | N | Cd      | A | 0.0000945 | 0.5523 | 0.0833 | 1.729  | 1.3188 | 7.1119 | 0.7227 | 230.4884 |
| N1Cd0     | N | Cd      | A | 0.0000945 | 0.3446 | 0.052  | 1.457  | 1.5638 | 7.1156 | 0.7201 | 234.7013 |
| N1Cd0     | N | Cd      | A | 0.0000945 | 0.5358 | 0.0808 | 1.736  | 1.8095 | 6.4959 | 0.7149 | 231.4654 |
| N1Cd0     | N | Cd      | A | 0.0000945 | 0.5358 | 0.0808 | 1.45   | 1.3212 | 6.4986 | 0.7097 | 215.3815 |
| N1Cd0     | N | Cd      | A | 0.0000945 | 0.5416 | 0.0831 | 1.361  | 1.5648 | 6.5014 | 0.7071 | 244.4855 |
| N1Cd100   | N | Cd      | B | 0.00945   | 0.2122 | 0.0134 | 15.348 | 1.5329 | 7.4956 | 1.8022 | 187.8877 |



|           |   |         |   |         |        |        |         |        |         |        |          |
|-----------|---|---------|---|---------|--------|--------|---------|--------|---------|--------|----------|
| N1Cd100   | N | Cd      | B | 0.00945 | 0.1862 | 0.0117 | 15.508  | 1.409  | 7.5     | 1.8302 | 187.7021 |
| N1Cd100   | N | Cd      | B | 0.00945 | 0.2089 | 0.0131 | 15.188  | 1.4748 | 7.508   | 1.8149 | 192.3576 |
| N1Cd100   | N | Cd      | B | 0.00945 | 0.2024 | 0.0127 | 17.458  | 1.5329 | 7.1708  | 1.8277 | 189.3158 |
| N1Cd100   | N | Cd      | B | 0.00945 | 0.2024 | 0.0127 | 13.238  | 1.4104 | 7.1806  | 1.787  | 177.7535 |
| N1Cd100   | N | Cd      | B | 0.00945 | 0.2082 | 0.0128 | 13.781  | 1.4757 | 7.1735  | 1.8149 | 195.7408 |
| N1Cd500   | N | Cd      | C | 0.04725 | 0.0222 | 0.0029 | 81.906  | 1.3895 | 8.9458  | 0.8464 | 164.5424 |
| N1Cd500   | N | Cd      | C | 0.04725 | 0.0754 | 0.0097 | 82.142  | 1.5244 | 8.9574  | 0.7661 | 172.2558 |
| N1Cd500   | N | Cd      | C | 0.04725 | 0.147  | 0.019  | 81.67   | 1.4595 | 8.9632  | 0.8878 | 161.8696 |
| N1Cd500   | N | Cd      | C | 0.04725 | 0.0815 | 0.0105 | 88.611  | 1.3895 | 10.2091 | 0.8049 | 166.2226 |
| N1Cd500   | N | Cd      | C | 0.04725 | 0.0815 | 0.0105 | 75.2    | 1.5257 | 10.2101 | 0.8408 | 159.181  |
| N1Cd500   | N | Cd      | C | 0.04725 | 0.0818 | 0.011  | 77.199  | 1.4598 | 10.2294 | 0.7523 | 178.6776 |
| N1Cd1000  | N | Cd      | D | 0.0945  | 0.0154 | 0.0039 | 146.993 | 1.1983 | 9.7627  | 0.4114 | 159.75   |
| N1Cd1000  | N | Cd      | D | 0.0095  | 0.0127 | 0.0032 | 147.313 | 1.1705 | 9.7706  | 0.2554 | 162.0061 |
| N1Cd1000  | N | Cd      | D | 0.0945  | 0.0287 | 0.0072 | 146.673 | 1.1857 | 9.7706  | 0.4369 | 161.477  |
| N1Cd1000  | N | Cd      | D | 0.0945  | 0.0189 | 0.0047 | 166.379 | 1.1996 | 9.4945  | 0.2809 | 161.0777 |
| N1Cd1000  | N | Cd      | D | 0.0945  | 0.0189 | 0.0048 | 127.607 | 1.1711 | 9.4985  | 0.4001 | 146.1475 |
| N1Cd1000  | N | Cd      | D | 0.0945  | 0.0195 | 0.005  | 133.749 | 1.1874 | 9.4945  | 0.2412 | 168.9726 |
| N1control | N | control | 0 | 0       | 1.1002 | 0.17   | 25.681  | 1.4669 | 6.7682  | 3.8385 | 205.132  |
| N1control | N | control | 0 | 0       | 0.9827 | 0.1518 | 26.704  | 1.4524 | 6.7775  | 3.9256 | 207.41   |
| N1control | N | control | 0 | 0       | 1.0525 | 0.1626 | 24.658  | 1.4598 | 6.7812  | 3.8385 | 209.6863 |
| N1control | N | control | 0 | 0       | 1.0451 | 0.1615 | 27.342  | 1.4691 | 6.8818  | 3.9282 | 207.4095 |
| N1control | N | control | 0 | 0       | 1.0451 | 0.1615 | 24.02   | 1.4531 | 6.8901  | 3.8122 | 192.9186 |
| N1control | N | control | 0 | 0       | 1.0477 | 0.1616 | 23.551  | 1.4623 | 6.8873  | 3.9071 | 210.5805 |
| N1Zn0     | N | Zn      | A | 0.28    | 0.1689 | 0.0206 | 243.43  | 1.9376 | 7.5836  | 5.239  | 224.4993 |
| N1Zn0     | N | Zn      | A | 0.28    | 0.1306 | 0.0159 | 243.732 | 1.9758 | 7.5864  | 5.2    | 226.7271 |
| N1Zn0     | N | Zn      | A | 0.28    | 0.0575 | 0.007  | 243.128 | 1.957  | 7.5991  | 5.2494 | 227.1877 |
| N1Zn0     | N | Zn      | A | 0.28    | 0.119  | 0.0145 | 265.806 | 1.9394 | 8.5682  | 5.1896 | 226.1381 |
| N1Zn0     | N | Zn      | A | 0.28    | 0.119  | 0.0145 | 221.053 | 1.9773 | 8.5745  | 5.226  | 205.3287 |
| N1Zn0     | N | Zn      | A | 0.28    | 0.1195 | 0.0148 | 228.21  | 1.9582 | 8.5773  | 5.187  | 229.4104 |
| N1Zn2     | N | Zn      | B | 0.56    | 0.0936 | 0.0149 | 377.157 | 2.0568 | 8.5502  | 4.4854 | 211.8943 |
| N1Zn2     | N | Zn      | B | 0.56    | 0.5194 | 0.0824 | 377.802 | 1.9537 | 8.5547  | 5      | 210.9241 |

|           |   |         |   |      |        |        |         |        |         |        |          |
|-----------|---|---------|---|------|--------|--------|---------|--------|---------|--------|----------|
| N1Zn2     | N | Zn      | B | 0.56 | 0.1086 | 0.0172 | 376.512 | 2.0066 | 8.5547  | 4.5059 | 213.7796 |
| N1Zn2     | N | Zn      | B | 0.56 | 0.2405 | 0.0382 | 395.751 | 2.0579 | 9.3154  | 5.0026 | 212.1993 |
| N1Zn2     | N | Zn      | B | 0.56 | 0.2405 | 0.0382 | 358.564 | 1.9543 | 9.3244  | 4.4598 | 198.2282 |
| N1Zn2     | N | Zn      | B | 0.56 | 0.2481 | 0.0397 | 364.117 | 2.0069 | 9.3333  | 4.9872 | 214.4053 |
| N1Zn4     | N | Zn      | C | 1.12 | 0.0138 | 0.0047 | 356.836 | 2.175  | 8.4389  | 5.2692 | 175.5832 |
| N1Zn4     | N | Zn      | C | 1.12 | 0.0077 | 0.0026 | 357.127 | 2.1512 | 8.4458  | 4.9103 | 171.5925 |
| N1Zn4     | N | Zn      | C | 1.12 | 0.0208 | 0.0071 | 356.545 | 2.1638 | 8.4518  | 5.311  | 178.4714 |
| N1Zn4     | N | Zn      | C | 1.12 | 0.0141 | 0.0048 | 382.641 | 2.1756 | 9.3812  | 4.8857 | 175.2157 |
| N1Zn4     | N | Zn      | C | 1.12 | 0.0141 | 0.0048 | 331.03  | 2.1517 | 9.3838  | 5.2692 | 174.1034 |
| N1Zn4     | N | Zn      | C | 1.12 | 0.0146 | 0.005  | 339.341 | 2.1655 | 9.3898  | 4.8857 | 184.9066 |
| N1Zn10    | N | Zn      | D | 2.8  | 0.0008 | 0.0003 | 511.377 | 3.0698 | 11.2075 | 9.1756 | 110.0157 |
| N1Zn10    | N | Zn      | D | 2.8  | 0.0005 | 0.0002 | 511.493 | 3.0267 | 11.2164 | 9.7346 | 111.0437 |
| N1Zn10    | N | Zn      | D | 2.8  | 0.0008 | 0.0003 | 511.261 | 3.0484 | 11.2105 | 9.2095 | 109.939  |
| N1Zn10    | N | Zn      | D | 2.8  | 0.0007 | 0.0002 | 525.398 | 3.0705 | 11.3557 | 9.7487 | 110.3328 |
| N1Zn10    | N | Zn      | D | 2.8  | 0.0007 | 0.0003 | 497.356 | 3.029  | 11.3557 | 9.17   | 104.5272 |
| N1Zn10    | N | Zn      | D | 2.8  | 0.0007 | 0.0003 | 520.608 | 3.0507 | 11.3666 | 9.7205 | 116.8031 |
| T1control | T | control | 0 | 0    | 1.25   | 0.1432 | 5.725   | 1.4055 | 6.171   | 2.3049 | 237.6365 |
| T1control | T | control | 0 | 0    | 1.102  | 0.1263 | 5.845   | 1.2841 | 6.1727  | 2.408  | 230.196  |
| T1control | T | control | 0 | 0    | 0.092  | 0.0105 | 5.605   | 1.3471 | 6.1813  | 2.3466 | 239.4143 |
| T1control | T | control | 0 | 0    | 0.8147 | 0.0933 | 6.454   | 1.4069 | 5.8711  | 2.435  | 235.7489 |
| T1control | T | control | 0 | 0    | 0.8147 | 0.0933 | 4.996   | 1.2864 | 5.8771  | 2.3024 | 217.3781 |
| T1control | T | control | 0 | 0    | 0.8459 | 0.0948 | 6.091   | 1.3482 | 5.8883  | 2.3932 | 252.1255 |
| T1Cu1/2   | T | Cu      | A | 0.13 | 0.0234 | 0.003  | 36.007  | 1.4797 | 4.082   | 2.5891 | 184.8072 |
| T1Cu1/2   | T | Cu      | A | 0.13 | 0.0265 | 0.0034 | 37.517  | 1.4812 | 4.0847  | 2.6958 | 206.8857 |
| T1Cu1/2   | T | Cu      | A | 0.13 | 0.0334 | 0.0042 | 34.497  | 1.4836 | 4.0984  | 2.6151 | 191.9433 |
| T1Cu1/2   | T | Cu      | A | 0.13 | 0.0274 | 0.0035 | 37.015  | 1.4885 | 3.5556  | 2.714  | 201.1056 |
| T1Cu1/2   | T | Cu      | A | 0.13 | 0.0277 | 0.0035 | 34.999  | 1.4924 | 3.5583  | 2.5813 | 179.4373 |
| T1Cu1/2   | T | Cu      | A | 0.13 | 0.0289 | 0.0036 | 35.169  | 1.4885 | 3.571   | 2.6932 | 200.1888 |
| T1Cu0     | T | Cu      | B | 0.26 | 0.0161 | 0.003  | 85.155  | 1.6306 | 4.6379  | 1.5736 | 181.8072 |
| T1Cu0     | T | Cu      | B | 0.26 | 0.0041 | 0.0008 | 85.254  | 1.7205 | 4.6497  | 1.7815 | 183.7073 |
| T1Cu0     | T | Cu      | B | 0.26 | 0.0071 | 0.0013 | 85.056  | 1.6757 | 4.6481  | 1.5833 | 186.6018 |

|           |   |         |   |       |        |        |          |        |        |        |          |
|-----------|---|---------|---|-------|--------|--------|----------|--------|--------|--------|----------|
| T1Cu0     | T | Cu      | B | 0.26  | 0.009  | 0.0017 | 90.004   | 1.6328 | 5.0017 | 1.7887 | 184.0387 |
| T1Cu0     | T | Cu      | B | 0.26  | 0.0091 | 0.0017 | 80.306   | 1.7208 | 5.0059 | 1.5712 | 177.7457 |
| T1Cu0     | T | Cu      | B | 0.26  | 0.0095 | 0.0018 | 88.289   | 1.6771 | 5.0068 | 1.7815 | 197.1888 |
| T1Cu2.5   | T | Cu      | C | 0.65  | 0.0122 | 0.0024 | 328.426  | 2.8418 | 6.5599 | 5.4147 | 129.766  |
| T1Cu2.5   | T | Cu      | C | 0.65  | 0.0072 | 0.0014 | 328.889  | 2.8443 | 6.5693 | 5.527  | 130.0078 |
| T1Cu2.5   | T | Cu      | C | 0.65  | 0.0052 | 0.001  | 327.963  | 2.8446 | 6.5758 | 5.4334 | 129.7409 |
| T1Cu2.5   | T | Cu      | C | 0.65  | 0.008  | 0.0016 | 351.705  | 2.8421 | 6.0159 | 5.5511 | 129.8383 |
| T1Cu2.5   | T | Cu      | C | 0.65  | 0.0082 | 0.0016 | 305.147  | 2.843  | 6.0187 | 5.4013 | 124.0492 |
| T1Cu2.5   | T | Cu      | C | 0.65  | 0.0085 | 0.0017 | 343.482  | 2.8443 | 6.0243 | 5.511  | 139.4344 |
| T1Cu5     | T | Cu      | D | 1.3   | 0.0021 | 0.0005 | 369.026  | 3.6133 | 8.6728 | 7.1318 | 59.7822  |
| T1Cu5     | T | Cu      | D | 1.3   | 0.0061 | 0.0014 | 336.0047 | 3.6136 | 8.6805 | 7.0491 | 58.2968  |
| T1Cu5     | T | Cu      | D | 1.3   | 0.0041 | 0.0009 | 420.0218 | 3.6133 | 8.6863 | 7.1594 | 62.5833  |
| T1Cu5     | T | Cu      | D | 1.3   | 0.004  | 0.0009 | 492.8164 | 3.5351 | 8.916  | 7.0463 | 63.3269  |
| T1Cu5     | T | Cu      | D | 1.3   | 0.0041 | 0.0009 | 355.4572 | 3.5389 | 8.9257 | 7.1263 | 59.1836  |
| T1Cu5     | T | Cu      | D | 1.3   | 0.0042 | 0.001  | 377.0435 | 3.5373 | 8.9305 | 7.0353 | 56.745   |
| T1control | T | control | 0 | 0     | 1.25   | 0.1432 | 0.297    | 1.4055 | 6.171  | 2.3049 | 237.6365 |
| T1control | T | control | 0 | 0     | 1.102  | 0.1263 | 0.323    | 1.2841 | 6.1727 | 2.408  | 230.196  |
| T1control | T | control | 0 | 0     | 0.092  | 0.0105 | 0.271    | 1.3471 | 6.1813 | 2.3466 | 239.4143 |
| T1control | T | control | 0 | 0     | 0.8147 | 0.0933 | 0.397    | 1.4069 | 5.8711 | 2.435  | 235.7489 |
| T1control | T | control | 0 | 0     | 0.8147 | 0.0933 | 0.297    | 1.2864 | 5.8771 | 2.3024 | 217.3781 |
| T1control | T | control | 0 | 0     | 0.8459 | 0.0948 | 0.337    | 1.3482 | 5.8883 | 2.3932 | 252.1255 |
| T1Pb0     | T | Pb      | A | 0.025 | 0.268  | 0.0411 | 0.495    | 2.1026 | 7.1616 | 4.832  | 229.6723 |
| T1Pb0     | T | Pb      | A | 0.025 | 0.321  | 0.0492 | 0.416    | 2.1144 | 7.1683 | 4.7473 | 226.6263 |
| T1Pb0     | T | Pb      | A | 0.025 | 0.224  | 0.0344 | 0.474    | 2.1122 | 7.1692 | 4.8156 | 231.2384 |
| T1Pb0     | T | Pb      | A | 0.025 | 0.271  | 0.0416 | 0.505    | 2.1029 | 7.7782 | 4.7774 | 229.179  |
| T1Pb0     | T | Pb      | A | 0.025 | 0.271  | 0.0416 | 0.485    | 2.1166 | 7.7878 | 4.8156 | 213.2224 |
| T1Pb0     | T | Pb      | A | 0.025 | 0.2785 | 0.0431 | 0.381    | 2.1147 | 7.7811 | 4.7446 | 238.6075 |
| T1Pb10    | T | Pb      | B | 0.25  | 0.1251 | 0.018  | 38.6     | 1.4426 | 5.8151 | 2.617  | 210.3221 |
| T1Pb10    | T | Pb      | B | 0.25  | 0.1691 | 0.0243 | 46.7     | 1.4345 | 5.8245 | 2.7478 | 209.2471 |
| T1Pb10    | T | Pb      | B | 0.25  | 0.1841 | 0.0264 | 46.5     | 1.4413 | 5.8263 | 2.6411 | 212.2549 |
| T1Pb10    | T | Pb      | B | 0.25  | 0.1593 | 0.0229 | 45.4     | 1.4444 | 5.7526 | 2.7664 | 210.608  |

|           |   |         |   |       |        |        |           |        |         |         |          |
|-----------|---|---------|---|-------|--------|--------|-----------|--------|---------|---------|----------|
| T1Pb10    | T | Pb      | B | 0.25  | 0.1594 | 0.0229 | 41.9      | 1.4357 | 5.7572  | 2.593   | 203.2306 |
| T1Pb10    | T | Pb      | B | 0.25  | 0.1613 | 0.0234 | 44.4      | 1.4435 | 5.7666  | 2.7371  | 214.3487 |
| T1Pb50    | T | Pb      | C | 1.25  | 0.0113 | 0.0018 | 275.243   | 3.4808 | 9.819   | 7.8846  | 181.8703 |
| T1Pb50    | T | Pb      | C | 1.25  | 0.0193 | 0.003  | 284.7985  | 3.5704 | 9.8218  | 7.8584  | 175.9568 |
| T1Pb50    | T | Pb      | C | 1.25  | 0.0153 | 0.0024 | 262.2333  | 3.5274 | 9.8199  | 7.9002  | 184.3313 |
| T1Pb50    | T | Pb      | C | 1.25  | 0.015  | 0.0024 | 295.8498  | 3.4832 | 9.7441  | 7.895   | 180.7195 |
| T1Pb50    | T | Pb      | C | 1.25  | 0.0152 | 0.0024 | 254.8965  | 3.5722 | 9.7486  | 7.8663  | 176.0813 |
| T1Pb50    | T | Pb      | C | 1.25  | 0.0159 | 0.0025 | 262.4166  | 3.5277 | 9.7578  | 7.848   | 191.3379 |
| T1Pb100   | T | Pb      | D | 2.5   | 0.0092 | 0.0017 | 937.7676  | 5.2531 | 12.798  | 10.9442 | 123.2534 |
| T1Pb100   | T | Pb      | D | 2.5   | 0.0132 | 0.0024 | 964.786   | 5.3008 | 12.803  | 10.4017 | 126.086  |
| T1Pb100   | T | Pb      | D | 2.5   | 0.0042 | 0.0008 | 941.7514  | 5.2816 | 12.802  | 10.9703 | 126.1388 |
| T1Pb100   | T | Pb      | D | 2.5   | 0.0087 | 0.0016 | 1053.6386 | 5.2538 | 12.8203 | 10.4249 | 125.1594 |
| T1Pb100   | T | Pb      | D | 2.5   | 0.0088 | 0.0016 | 773.1527  | 5.3032 | 12.8244 | 10.9442 | 113.1492 |
| T1Pb100   | T | Pb      | D | 2.5   | 0.0091 | 0.0017 | 833.2952  | 5.2839 | 12.8284 | 10.3988 | 127.8826 |
| T1control | T | control | 0 | 0     | 1.25   | 0.1432 | 1.687     | 1.4055 | 6.171   | 2.3049  | 237.6365 |
| T1control | T | control | 0 | 0     | 1.102  | 0.1263 | 1.725     | 1.2841 | 6.1727  | 2.408   | 230.196  |
| T1control | T | control | 0 | 0     | 0.092  | 0.0105 | 1.649     | 1.3471 | 6.1813  | 2.3466  | 239.4143 |
| T1control | T | control | 0 | 0     | 0.8147 | 0.0933 | 1.742     | 1.4069 | 5.8711  | 2.435   | 235.7489 |
| T1control | T | control | 0 | 0     | 0.8147 | 0.0933 | 1.632     | 1.2864 | 5.8771  | 2.3024  | 217.3781 |
| T1control | T | control | 0 | 0     | 0.8459 | 0.0948 | 1.686     | 1.3482 | 5.8883  | 2.3932  | 252.1255 |
| T1Cr0     | T | Cr      | A | 0.036 | 0.8514 | 0.0793 | 2.068     | 1.9    | 4.3058  | 1.2308  | 222.9126 |
| T1Cr0     | T | Cr      | A | 0.036 | 0.9544 | 0.0889 | 2.181     | 1.9151 | 4.3077  | 1.2473  | 221.7864 |
| T1Cr0     | T | Cr      | A | 0.036 | 1.0104 | 0.0941 | 1.955     | 1.908  | 4.3212  | 1.228   | 226.2947 |
| T1Cr0     | T | Cr      | A | 0.036 | 0.9383 | 0.0874 | 2.204     | 1.9016 | 3.4087  | 1.2775  | 223.6645 |
| T1Cr0     | T | Cr      | A | 0.036 | 0.9386 | 0.0874 | 1.932     | 1.916  | 3.4096  | 1.2225  | 213.0934 |
| T1Cr0     | T | Cr      | A | 0.036 | 0.9788 | 0.0896 | 2.045     | 1.909  | 3.4163  | 1.2335  | 240.5534 |
| T1Cr5     | T | Cr      | B | 0.18  | 0.1052 | 0.0149 | 6.073     | 1.986  | 4.8691  | 1.3644  | 251.3646 |
| T1Cr5     | T | Cr      | B | 0.18  | 0.1192 | 0.0169 | 6.1       | 1.9502 | 4.8701  | 1.3253  | 247.9893 |
| T1Cr5     | T | Cr      | B | 0.18  | 0.1062 | 0.0151 | 6.046     | 1.9691 | 4.875   | 1.3644  | 254.0301 |
| T1Cr5     | T | Cr      | B | 0.18  | 0.11   | 0.0156 | 6.136     | 1.986  | 3.9395  | 1.3421  | 251.128  |
| T1Cr5     | T | Cr      | B | 0.18  | 0.1102 | 0.0156 | 6.01      | 1.9515 | 3.9424  | 1.3532  | 245.8746 |

|           |   |         |   |       |        |        |         |        |         |         |          |
|-----------|---|---------|---|-------|--------|--------|---------|--------|---------|---------|----------|
| T1Cr5     | T | Cr      | B | 0.18  | 0.1113 | 0.0162 | 6.088   | 1.9701 | 3.9453  | 1.303   | 256.3627 |
| T1Cr10    | T | Cr      | C | 0.36  | 0.0264 | 0.0031 | 9.451   | 2.4986 | 6.3045  | 3.2347  | 230.5907 |
| T1Cr10    | T | Cr      | C | 0.36  | 0.0154 | 0.0018 | 9.516   | 2.7697 | 6.3155  | 3.4853  | 235.8436 |
| T1Cr10    | T | Cr      | C | 0.36  | 0.0144 | 0.0017 | 9.386   | 2.6366 | 6.3174  | 3.2479  | 234.1573 |
| T1Cr10    | T | Cr      | C | 0.36  | 0.0183 | 0.0022 | 9.525   | 2.5005 | 5.4572  | 3.4853  | 233.5305 |
| T1Cr10    | T | Cr      | C | 0.36  | 0.0186 | 0.0022 | 9.378   | 2.7712 | 5.4673  | 3.219   | 213.8135 |
| T1Cr10    | T | Cr      | C | 0.36  | 0.0194 | 0.0023 | 9.435   | 2.6381 | 5.4747  | 3.4722  | 238.736  |
| T1Cr25    | T | Cr      | D | 0.90  | 0.012  | 0.0032 | 141.203 | 5.6198 | 11.0269 | 10.1638 | 164.8509 |
| T1Cr25    | T | Cr      | D | 0.90  | 0.008  | 0.0021 | 141.715 | 5.6893 | 11.0349 | 10.1837 | 168.3659 |
| T1Cr25    | T | Cr      | D | 0.90  | 0.021  | 0.0056 | 140.691 | 5.6567 | 11.0369 | 10.2094 | 166.7035 |
| T1Cr25    | T | Cr      | D | 0.90  | 0.0137 | 0.0036 | 154.71  | 5.6221 | 11.0209 | 10.2094 | 166.6401 |
| T1Cr25    | T | Cr      | D | 0.90  | 0.0137 | 0.0036 | 127.695 | 5.6906 | 11.0319 | 10.1609 | 150.0718 |
| T1Cr25    | T | Cr      | D | 0.90  | 0.0141 | 0.0037 | 149.696 | 5.6577 | 11.0229 | 10.178  | 169.8817 |
| T1control | T | control | 0 | 0     | 1.25   | 0.1432 | 2.135   | 1.4055 | 6.171   | 2.3049  | 237.6365 |
| T1control | T | control | 0 | 0     | 1.102  | 0.1263 | 2.227   | 1.2841 | 6.1727  | 2.408   | 230.196  |
| T1control | T | control | 0 | 0     | 0.092  | 0.0105 | 2.043   | 1.3471 | 6.1813  | 2.3466  | 239.4143 |
| T1control | T | control | 0 | 0     | 0.8147 | 0.0933 | 2.137   | 1.4069 | 5.8711  | 2.435   | 235.7489 |
| T1control | T | control | 0 | 0     | 0.8147 | 0.0933 | 2.132   | 1.2864 | 5.8771  | 2.3024  | 217.3781 |
| T1control | T | control | 0 | 0     | 0.8459 | 0.0948 | 2.044   | 1.3482 | 5.8883  | 2.3932  | 252.1255 |
| T1Ni0     | T | Ni      | A | 0.025 | 0.1491 | 0.0146 | 23.803  | 1.3995 | 5.5906  | 5.6925  | 216.7767 |
| T1Ni0     | T | Ni      | A | 0.025 | 0.2191 | 0.0215 | 24.229  | 1.7141 | 5.5973  | 5.6543  | 216.6148 |
| T1Ni0     | T | Ni      | A | 0.025 | 0.2661 | 0.0261 | 23.377  | 1.5611 | 5.6011  | 5.6952  | 218.9994 |
| T1Ni0     | T | Ni      | A | 0.025 | 0.2113 | 0.0207 | 25.143  | 1.4001 | 5.7004  | 5.657   | 217.4636 |
| T1Ni0     | T | Ni      | A | 0.025 | 0.2114 | 0.0207 | 22.463  | 1.7163 | 5.7071  | 5.6897  | 201.7511 |
| T1Ni0     | T | Ni      | A | 0.025 | 0.2145 | 0.0215 | 24.27   | 1.562  | 5.7023  | 5.6407  | 218.3947 |
| T1Ni5     | T | Ni      | B | 0.125 | 0.0723 | 0.0105 | 184.909 | 1.2359 | 5.4835  | 4.7583  | 177.6597 |
| T1Ni5     | T | Ni      | B | 0.125 | 0.0513 | 0.0074 | 184.96  | 1.3296 | 5.4882  | 4.8822  | 174.6947 |
| T1Ni5     | T | Ni      | B | 0.125 | 0.0543 | 0.0079 | 184.858 | 1.2834 | 5.4976  | 4.7502  | 179.7923 |
| T1Ni5     | T | Ni      | B | 0.125 | 0.059  | 0.0085 | 208.354 | 1.2375 | 5.4835  | 4.8876  | 177.3822 |
| T1Ni5     | T | Ni      | B | 0.125 | 0.0592 | 0.0086 | 161.464 | 1.3299 | 5.4844  | 4.7448  | 168.6957 |
| T1Ni5     | T | Ni      | B | 0.125 | 0.0593 | 0.009  | 169.228 | 1.285  | 5.4901  | 4.8714  | 184.2651 |

|           |   |         |   |           |        |        |         |        |        |        |          |
|-----------|---|---------|---|-----------|--------|--------|---------|--------|--------|--------|----------|
| T1Ni10    | T | Ni      | C | 0.25      | 0.0262 | 0.004  | 118.919 | 2.5725 | 7.91   | 5.7441 | 177.5996 |
| T1Ni10    | T | Ni      | C | 0.25      | 0.0412 | 0.0062 | 119.627 | 2.5182 | 7.9194 | 5.6953 | 175.6459 |
| T1Ni10    | T | Ni      | C | 0.25      | 0.0342 | 0.0052 | 118.211 | 2.5491 | 7.927  | 5.7712 | 177.5863 |
| T1Ni10    | T | Ni      | C | 0.25      | 0.0337 | 0.0051 | 119.036 | 2.5744 | 8.1422 | 5.6737 | 176.944  |
| T1Ni10    | T | Ni      | C | 0.25      | 0.0338 | 0.0051 | 118.802 | 2.5204 | 8.1536 | 5.7414 | 175.9079 |
| T1Ni10    | T | Ni      | C | 0.25      | 0.0351 | 0.0052 | 118.133 | 2.5498 | 8.1573 | 5.6682 | 182.9579 |
| T1Ni25    | T | Ni      | D | 0.625     | 0.0071 | 0.0012 | 149.354 | 2.4332 | 7.8993 | 7.0318 | 146.4202 |
| T1Ni25    | T | Ni      | D | 0.625     | 0.0051 | 0.0008 | 149.484 | 2.47   | 7.9037 | 6.8703 | 148.1922 |
| T1Ni25    | T | Ni      | D | 0.625     | 0.0141 | 0.0023 | 149.224 | 2.4544 | 7.9019 | 7.0192 | 150.5743 |
| T1Ni25    | T | Ni      | D | 0.625     | 0.0087 | 0.0014 | 155.967 | 2.4346 | 8.4099 | 6.8627 | 148.3956 |
| T1Ni25    | T | Ni      | D | 0.625     | 0.0088 | 0.0014 | 142.742 | 2.4717 | 8.4134 | 7.0167 | 142.2239 |
| T1Ni25    | T | Ni      | D | 0.625     | 0.009  | 0.0015 | 144.816 | 2.4564 | 8.4231 | 6.8501 | 157.3231 |
| T1control | T | control | 0 | 0         | 1.25   | 0.1432 | 0.352   | 1.4055 | 6.171  | 2.3049 | 237.6365 |
| T1control | T | control | 0 | 0         | 1.102  | 0.1263 | 0.378   | 1.2841 | 6.1727 | 2.408  | 230.196  |
| T1control | T | control | 0 | 0         | 0.092  | 0.0105 | 0.326   | 1.3471 | 6.1813 | 2.3466 | 239.4143 |
| T1control | T | control | 0 | 0         | 0.8147 | 0.0933 | 0.346   | 1.4069 | 5.8711 | 2.435  | 235.7489 |
| T1control | T | control | 0 | 0         | 0.8147 | 0.0933 | 0.358   | 1.2864 | 5.8771 | 2.3024 | 217.3781 |
| T1control | T | control | 0 | 0         | 0.8459 | 0.0948 | 0.323   | 1.3482 | 5.8883 | 2.3932 | 252.1255 |
| T1Cd0     | T | Cd      | A | 0.0000945 | 0.3632 | 0.0377 | 1.807   | 1.696  | 3.2578 | 4.2464 | 198.6959 |
| T1Cd0     | T | Cd      | A | 0.0000945 | 0.4092 | 0.0425 | 1.813   | 1.6465 | 3.267  | 3.8689 | 206.8857 |
| T1Cd0     | T | Cd      | A | 0.0000945 | 0.2582 | 0.0268 | 1.801   | 1.6752 | 3.2752 | 4.2647 | 197.5748 |
| T1Cd0     | T | Cd      | A | 0.0000945 | 0.3433 | 0.0357 | 2.031   | 1.6966 | 3.2404 | 3.8873 | 201.0522 |
| T1Cd0     | T | Cd      | A | 0.0000945 | 0.3435 | 0.0357 | 1.583   | 1.6474 | 3.2468 | 4.2307 | 181.1289 |
| T1Cd0     | T | Cd      | A | 0.0000945 | 0.3585 | 0.0374 | 1.652   | 1.6761 | 3.2587 | 3.8506 | 219.7805 |
| T1Cd100   | T | Cd      | B | 0.00945   | 0.0613 | 0.0068 | 79.916  | 1.6602 | 3.4    | 3.0159 | 197.8446 |
| T1Cd100   | T | Cd      | B | 0.00945   | 0.1163 | 0.0129 | 80.171  | 1.45   | 3.4065 | 3.0212 | 193.6952 |
| T1Cd100   | T | Cd      | B | 0.00945   | 0.0943 | 0.0105 | 79.661  | 1.5552 | 3.4056 | 3.0106 | 198.5452 |
| T1Cd100   | T | Cd      | B | 0.00945   | 0.0903 | 0.01   | 86.26   | 1.6623 | 3.1528 | 3.0238 | 196.695  |
| T1Cd100   | T | Cd      | B | 0.00945   | 0.0906 | 0.0101 | 63.572  | 1.4503 | 3.1611 | 3.0053 | 179.7815 |
| T1Cd100   | T | Cd      | B | 0.00945   | 0.0924 | 0.0105 | 68.765  | 1.5552 | 3.1574 | 3.0079 | 211.4139 |
| T1Cd500   | T | Cd      | C | 0.04725   | 0.0473 | 0.0062 | 454.628 | 1.1502 | 3.4966 | 3.2215 | 106.0349 |

|           |   |         |   |         |        |        |          |        |        |        |          |
|-----------|---|---------|---|---------|--------|--------|----------|--------|--------|--------|----------|
| T1Cd500   | T | Cd      | C | 0.04725 | 0.1053 | 0.0137 | 455.685  | 1.6337 | 3.5053 | 3.342  | 106.477  |
| T1Cd500   | T | Cd      | C | 0.04725 | 0.0253 | 0.0033 | 453.571  | 1.3931 | 3.5014 | 3.2297 | 108.0466 |
| T1Cd500   | T | Cd      | C | 0.04725 | 0.059  | 0.0077 | 467.714  | 1.1518 | 3.2531 | 3.3584 | 106.8528 |
| T1Cd500   | T | Cd      | C | 0.04725 | 0.0592 | 0.0077 | 441.542  | 1.6353 | 3.256  | 3.2105 | 104.3214 |
| T1Cd500   | T | Cd      | C | 0.04725 | 0.0597 | 0.008  | 444.847  | 1.3944 | 3.2637 | 3.3338 | 116.5813 |
| T1Cd1000  | T | Cd      | D | 0.0945  | 0.0143 | 0.0033 | 538.328  | 2.276  | 5.6894 | 7.0907 | 85.465   |
| T1Cd1000  | T | Cd      | D | 0.0095  | 0.0073 | 0.0017 | 540.106  | 2.3179 | 5.6904 | 6.9176 | 85.4043  |
| T1Cd1000  | T | Cd      | D | 0.0945  | 0.0023 | 0.0005 | 536.55   | 2.3    | 5.7029 | 7.1236 | 91.2155  |
| T1Cd1000  | T | Cd      | D | 0.0945  | 0.0077 | 0.0018 | 559.161  | 2.2769 | 4.8769 | 6.9533 | 87.3616  |
| T1Cd1000  | T | Cd      | D | 0.0945  | 0.0079 | 0.0018 | 517.494  | 2.3192 | 4.8856 | 7.0769 | 82.4296  |
| T1Cd1000  | T | Cd      | D | 0.0945  | 0.008  | 0.0019 | 522.661  | 2.3026 | 4.8962 | 6.9038 | 92.5293  |
| T1control | T | control | 0 | 0       | 1.25   | 0.1432 | 29.728   | 1.4055 | 6.171  | 2.3049 | 237.6365 |
| T1control | T | control | 0 | 0       | 1.102  | 0.1263 | 31.931   | 1.2841 | 6.1727 | 2.408  | 230.196  |
| T1control | T | control | 0 | 0       | 0.092  | 0.0105 | 27.525   | 1.3471 | 6.1813 | 2.3466 | 239.4143 |
| T1control | T | control | 0 | 0       | 0.8147 | 0.0933 | 31.282   | 1.4069 | 5.8711 | 2.435  | 235.7489 |
| T1control | T | control | 0 | 0       | 0.8147 | 0.0933 | 28.175   | 1.2864 | 5.8771 | 2.3024 | 217.3781 |
| T1control | T | control | 0 | 0       | 0.8459 | 0.0948 | 26.489   | 1.3482 | 5.8883 | 2.3932 | 252.1255 |
| T1Zn0     | T | Zn      | A | 0.28    | 0.0752 | 0.0104 | 553.47   | 2.5711 | 7.6906 | 6.0008 | 189.1445 |
| T1Zn0     | T | Zn      | A | 0.28    | 0.1062 | 0.0147 | 555.115  | 2.492  | 7.701  | 5.9576 | 190.7201 |
| T1Zn0     | T | Zn      | A | 0.28    | 0.0352 | 0.0049 | 551.825  | 2.533  | 7.6954 | 6.0278 | 191.7493 |
| T1Zn0     | T | Zn      | A | 0.28    | 0.072  | 0.01   | 609.562  | 2.5736 | 7.9281 | 5.9765 | 190.5379 |
| T1Zn0     | T | Zn      | A | 0.28    | 0.0722 | 0.01   | 497.378  | 2.4923 | 7.9385 | 5.9765 | 180.0464 |
| T1Zn0     | T | Zn      | A | 0.28    | 0.0724 | 0.0101 | 514.431  | 2.533  | 7.9366 | 5.9332 | 197.7271 |
| T1Zn2     | T | Zn      | B | 0.56    | 0.0532 | 0.0079 | 1003.147 | 1.8755 | 6.9157 | 4.2663 | 151.6044 |
| T1Zn2     | T | Zn      | B | 0.56    | 0.0682 | 0.0101 | 1003.519 | 1.8374 | 6.9238 | 4.502  | 148.5056 |
| T1Zn2     | T | Zn      | B | 0.56    | 0.0772 | 0.0114 | 1002.775 | 1.858  | 6.9248 | 4.2637 | 151.8552 |
| T1Zn2     | T | Zn      | B | 0.56    | 0.066  | 0.0098 | 1017.795 | 1.8764 | 7.0535 | 4.5175 | 150.6551 |
| T1Zn2     | T | Zn      | B | 0.56    | 0.0662 | 0.0098 | 988.5    | 1.8398 | 7.0617 | 4.2559 | 147.5736 |
| T1Zn2     | T | Zn      | B | 0.56    | 0.0688 | 0.0099 | 993.01   | 1.8598 | 7.0544 | 4.4891 | 158.973  |
| T1Zn4     | T | Zn      | C | 1.12    | 0.0322 | 0.0059 | 1374.456 | 2.161  | 8.3725 | 5.6033 | 109.601  |
| T1Zn4     | T | Zn      | C | 1.12    | 0.0492 | 0.0091 | 1376.046 | 2.1524 | 8.3815 | 5.6375 | 108.4899 |

|           |   |         |   |      |        |        |          |        |         |         |          |
|-----------|---|---------|---|------|--------|--------|----------|--------|---------|---------|----------|
| T1Zn4     | T | Zn      | C | 1.12 | 0.0242 | 0.0045 | 1372.866 | 2.16   | 8.3835  | 5.6118  | 114.7745 |
| T1Zn4     | T | Zn      | C | 1.12 | 0.035  | 0.0064 | 1444.04  | 2.1637 | 8.2998  | 5.6517  | 110.9551 |
| T1Zn4     | T | Zn      | C | 1.12 | 0.0352 | 0.0065 | 1304.872 | 2.1544 | 8.3118  | 5.5777  | 100.6187 |
| T1Zn4     | T | Zn      | C | 1.12 | 0.0368 | 0.0066 | 1326.476 | 2.16   | 8.3078  | 5.609   | 115.4467 |
| T1Zn10    | T | Zn      | D | 2.8  | 0.0022 | 0.0004 | 2526.246 | 4.7979 | 13.5822 | 11.3516 | 56.9371  |
| T1Zn10    | T | Zn      | D | 2.8  | 0.0082 | 0.0014 | 2527.981 | 4.9177 | 13.585  | 11.4286 | 58.2968  |
| T1Zn10    | T | Zn      | D | 2.8  | 0.0032 | 0.0006 | 2524.511 | 4.8598 | 13.5822 | 11.3782 | 61.9082  |
| T1Zn10    | T | Zn      | D | 2.8  | 0.0043 | 0.0008 | 2558.5   | 4.7998 | 13.4058 | 11.4551 | 59.0474  |
| T1Zn10    | T | Zn      | D | 2.8  | 0.0045 | 0.0008 | 2493.992 | 4.9201 | 13.416  | 11.3437 | 58.9301  |
| T1Zn10    | T | Zn      | D | 2.8  | 0.0046 | 0.0008 | 2503.009 | 4.862  | 13.4095 | 11.4127 | 62.6046  |
| P1control | P | control | O | 0    | 0.7665 | 0.071  | 5.312    | 2.5246 | 6.4491  | 0.614   | 239.7521 |
| P1control | P | control | O | 0    | 1.0949 | 0.1015 | 5.495    | 2.5263 | 6.4605  | 0.4982  | 236.582  |
| P1control | P | control | O | 0    | 0.0834 | 0.0077 | 5.129    | 2.5254 | 6.4535  | 0.6491  | 242.232  |
| P1control | P | control | O | 0    | 0.6483 | 0.0601 | 5.821    | 2.5266 | 6.6193  | 0.4907  | 239.522  |
| P1control | P | control | O | 0    | 0.6483 | 0.0601 | 4.803    | 2.5287 | 6.6272  | 0.614   | 234.1651 |
| P1control | P | control | O | 0    | 0.6684 | 0.0603 | 4.79     | 2.526  | 6.6193  | 0.4782  | 250.2915 |
| P1Cu1/2   | P | Cu      | A | 0.13 | 0.0072 | 0.0012 | 105.185  | 2.2802 | 6.999   | 1.8345  | 198.6959 |
| P1Cu1/2   | P | Cu      | A | 0.13 | 0.0232 | 0.0037 | 105.344  | 2.2815 | 7.009   | 1.9655  | 191.5452 |
| P1Cu1/2   | P | Cu      | A | 0.13 | 0.0218 | 0.0035 | 105.026  | 2.2805 | 7.002   | 1.8373  | 199.2971 |
| P1Cu1/2   | P | Cu      | A | 0.13 | 0.0174 | 0.0028 | 114.648  | 2.2768 | 7.0877  | 1.9855  | 192.5454 |
| P1Cu1/2   | P | Cu      | A | 0.13 | 0.0174 | 0.0028 | 95.723   | 2.2795 | 7.0917  | 1.8146  | 177.7457 |
| P1Cu1/2   | P | Cu      | A | 0.13 | 0.018  | 0.0029 | 98.718   | 2.2785 | 7.0977  | 1.9598  | 209.7805 |
| P1Cu0     | P | Cu      | B | 0.26 | 0.0021 | 0.0004 | 209.657  | 2.5331 | 8.3082  | 4.0443  | 167.8601 |
| P1Cu0     | P | Cu      | B | 0.26 | 0.0018 | 0.0003 | 210.094  | 2.5401 | 8.3191  | 4.192   | 167.3202 |
| P1Cu0     | P | Cu      | B | 0.26 | 0.0037 | 0.0007 | 209.22   | 2.5384 | 8.3201  | 4.0755  | 169.6409 |
| P1Cu0     | P | Cu      | B | 0.26 | 0.0025 | 0.0005 | 222.493  | 2.5331 | 8.2704  | 4.1892  | 168.2737 |
| P1Cu0     | P | Cu      | B | 0.26 | 0.0025 | 0.0005 | 196.822  | 2.5414 | 8.2744  | 4.0244  | 154.7084 |
| P1Cu0     | P | Cu      | B | 0.26 | 0.0026 | 0.0005 | 200.663  | 2.5391 | 8.2843  | 4.1863  | 170.0231 |
| P1Cu2.5   | P | Cu      | C | 0.65 | 0.0005 | 0.0001 | 906.381  | 2.9896 | 12.7288 | 15.9891 | 68.1203  |
| P1Cu2.5   | P | Cu      | C | 0.65 | 0.0005 | 0.0001 | 906.495  | 2.9064 | 12.7324 | 15.8764 | 67.1462  |
| P1Cu2.5   | P | Cu      | C | 0.65 | 0.0007 | 0.0002 | 906.267  | 2.9522 | 12.7395 | 15.9754 | 68.693   |



|           |   |         |   |       |        |        |          |        |         |         |          |
|-----------|---|---------|---|-------|--------|--------|----------|--------|---------|---------|----------|
| P1Cu2.5   | P | Cu      | C | 0.65  | 0.0006 | 0.0002 | 917.04   | 2.992  | 12.0346 | 15.8696 | 67.9865  |
| P1Cu2.5   | P | Cu      | C | 0.65  | 0.0006 | 0.0002 | 895.722  | 2.908  | 12.0418 | 15.9549 | 65.3154  |
| P1Cu2.5   | P | Cu      | C | 0.65  | 0.0006 | 0.0002 | 899.161  | 2.953  | 12.0382 | 15.8559 | 73.2618  |
| P1Cu5     | P | Cu      | D | 1.3   | 0.0003 | 0.0001 | 904.381  | 4.0227 | 11.6035 | 15.3988 | 56.9371  |
| P1Cu5     | P | Cu      | D | 1.3   | 0.0004 | 0.0001 | 866.495  | 4.0235 | 11.6058 | 15.1511 | 59.4158  |
| P1Cu5     | P | Cu      | D | 1.3   | 0.0008 | 0.0002 | 906.267  | 4.0247 | 11.6139 | 15.3988 | 62.9177  |
| P1Cu5     | P | Cu      | D | 1.3   | 0.0005 | 0.0001 | 912.04   | 4.062  | 11.6983 | 15.1544 | 62.1296  |
| P1Cu5     | P | Cu      | D | 1.3   | 0.0005 | 0.0001 | 885.22   | 4.0655 | 11.711  | 15.3955 | 55.8487  |
| P1Cu5     | P | Cu      | D | 1.3   | 0.0005 | 0.0001 | 909.137  | 4.0655 | 11.7133 | 15.1214 | 67.2125  |
| P1control | P | control | 0 | 0     | 0.7665 | 0.071  | 1.94     | 2.5246 | 6.4491  | 0.614   | 239.7521 |
| P1control | P | control | 0 | 0     | 1.0949 | 0.1015 | 1.96     | 2.5263 | 6.4605  | 0.4982  | 236.582  |
| P1control | P | control | 0 | 0     | 0.0834 | 0.0077 | 1.92     | 2.5254 | 6.4535  | 0.6491  | 242.232  |
| P1control | P | control | 0 | 0     | 0.6483 | 0.0601 | 2.129    | 2.5266 | 6.6193  | 0.4907  | 239.522  |
| P1control | P | control | 0 | 0     | 0.6483 | 0.0601 | 1.751    | 2.5287 | 6.6272  | 0.614   | 234.1651 |
| P1control | P | control | 0 | 0     | 0.6684 | 0.0603 | 1.794    | 2.526  | 6.6193  | 0.4782  | 250.2915 |
| P1Pb0     | P | Pb      | A | 0.025 | 0.2586 | 0.0325 | 0.963    | 1.6213 | 6.3163  | 0.9036  | 238.3974 |
| P1Pb0     | P | Pb      | A | 0.025 | 0.5483 | 0.0688 | 1.078    | 1.6706 | 6.3254  | 0.5876  | 231.5713 |
| P1Pb0     | P | Pb      | A | 0.025 | 0.224  | 0.0281 | 0.848    | 1.6496 | 6.3282  | 0.8932  | 242.076  |
| P1Pb0     | P | Pb      | A | 0.025 | 0.3436 | 0.0431 | 0.972    | 1.6213 | 6.2413  | 0.619   | 237.3482 |
| P1Pb0     | P | Pb      | A | 0.025 | 0.3436 | 0.0431 | 0.955    | 1.6709 | 6.245   | 0.8801  | 229.0411 |
| P1Pb0     | P | Pb      | A | 0.025 | 0.3579 | 0.0448 | 0.843    | 1.6514 | 6.2541  | 0.5667  | 242.1317 |
| P1Pb10    | P | Pb      | B | 0.25  | 0.1081 | 0.014  | 46.382   | 2.704  | 8.5943  | 3.803   | 229.798  |
| P1Pb10    | P | Pb      | B | 0.25  | 0.1619 | 0.0209 | 46.693   | 2.6798 | 8.5963  | 3.904   | 235.9708 |
| P1Pb10    | P | Pb      | B | 0.25  | 0.1341 | 0.0173 | 46.071   | 2.6932 | 8.5992  | 3.8198  | 233.1783 |
| P1Pb10    | P | Pb      | B | 0.25  | 0.1347 | 0.0174 | 48.947   | 2.7053 | 8.722   | 3.9096  | 232.9824 |
| P1Pb10    | P | Pb      | B | 0.25  | 0.1347 | 0.0174 | 43.816   | 2.6811 | 8.723   | 3.7749  | 213.5638 |
| P1Pb10    | P | Pb      | B | 0.25  | 0.1363 | 0.0178 | 44.36    | 2.6938 | 8.7407  | 3.8844  | 245.6769 |
| P1Pb50    | P | Pb      | C | 1.25  | 0.0049 | 0.001  | 289.3553 | 2.6434 | 8.9189  | 3.9395  | 169.2435 |
| P1Pb50    | P | Pb      | C | 1.25  | 0.013  | 0.0027 | 310.139  | 2.6349 | 8.9237  | 4.0921  | 165.4709 |
| P1Pb50    | P | Pb      | C | 1.25  | 0.0124 | 0.0025 | 260.7688 | 2.6479 | 8.937   | 3.9449  | 167.8785 |
| P1Pb50    | P | Pb      | C | 1.25  | 0.0101 | 0.0021 | 317.5569 | 2.645  | 9.4208  | 4.0812  | 172.054  |

|           |   |         |   |       |        |        |          |        |        |        |          |
|-----------|---|---------|---|-------|--------|--------|----------|--------|--------|--------|----------|
| P1Pb50    | P | Pb      | C | 1.25  | 0.0101 | 0.0021 | 269.8601 | 2.6358 | 9.4208 | 3.9204 | 165.6331 |
| P1Pb50    | P | Pb      | C | 1.25  | 0.0106 | 0.0022 | 278.2293 | 2.6479 | 9.438  | 4.0731 | 188.6675 |
| P1Pb100   | P | Pb      | D | 2.5   | 0.0058 | 0.0014 | 545.5931 | 2.7536 | 9.3025 | 5.1682 | 123.0591 |
| P1Pb100   | P | Pb      | D | 2.5   | 0.0038 | 0.0009 | 498.2816 | 2.7551 | 9.308  | 4.7516 | 110.2242 |
| P1Pb100   | P | Pb      | D | 2.5   | 0.0013 | 0.0003 | 478.0479 | 2.7566 | 9.3161 | 5.1993 | 111.7552 |
| P1Pb100   | P | Pb      | D | 2.5   | 0.0036 | 0.0009 | 561.6049 | 2.7612 | 9.3986 | 4.9671 | 115.914  |
| P1Pb100   | P | Pb      | D | 2.5   | 0.0036 | 0.0009 | 424.6352 | 2.7627 | 9.4103 | 5.1605 | 104.7335 |
| P1Pb100   | P | Pb      | D | 2.5   | 0.0036 | 0.0009 | 466.3875 | 2.7627 | 9.4112 | 4.7516 | 123.5776 |
| P1control | P | control | 0 | 0     | 0.7665 | 0.071  | 1.934    | 2.5246 | 6.4491 | 0.614  | 239.7521 |
| P1control | P | control | 0 | 0     | 1.0949 | 0.1015 | 2.019    | 2.5263 | 6.4605 | 0.4982 | 236.582  |
| P1control | P | control | 0 | 0     | 0.0834 | 0.0077 | 1.849    | 2.5254 | 6.4535 | 0.6491 | 242.232  |
| P1control | P | control | 0 | 0     | 0.6483 | 0.0601 | 2.183    | 2.5266 | 6.6193 | 0.4907 | 239.522  |
| P1control | P | control | 0 | 0     | 0.6483 | 0.0601 | 1.684    | 2.5287 | 6.6272 | 0.614  | 234.1651 |
| P1control | P | control | 0 | 0     | 0.6684 | 0.0603 | 1.682    | 2.526  | 6.6193 | 0.4782 | 250.2915 |
| P1Cr0     | P | Cr      | A | 0.036 | 0.8483 | 0.1029 | 1.477    | 1.3589 | 6.55   | 0.9167 | 231.8204 |
| P1Cr0     | P | Cr      | A | 0.036 | 0.2204 | 0.0267 | 1.513    | 1.4094 | 6.5603 | 0.8018 | 221.0949 |
| P1Cr0     | P | Cr      | A | 0.036 | 1.0067 | 0.1221 | 1.441    | 1.3882 | 6.5622 | 0.9328 | 235.1955 |
| P1Cr0     | P | Cr      | A | 0.036 | 0.6918 | 0.0839 | 1.592    | 1.3595 | 5.8877 | 0.8446 | 229.3703 |
| P1Cr0     | P | Cr      | A | 0.036 | 0.6918 | 0.0839 | 1.361    | 1.4116 | 5.8915 | 0.9114 | 222.3743 |
| P1Cr0     | P | Cr      | A | 0.036 | 0.695  | 0.0843 | 1.364    | 1.3891 | 5.9018 | 0.7938 | 237.8185 |
| P1Cr5     | P | Cr      | B | 0.18  | 0.1035 | 0.0119 | 4.047    | 1.5213 | 6.7884 | 1.5711 | 241.6813 |
| P1Cr5     | P | Cr      | B | 0.18  | 0.1183 | 0.0136 | 4.079    | 1.502  | 6.7994 | 1.631  | 243.329  |
| P1Cr5     | P | Cr      | B | 0.18  | 0.1332 | 0.0154 | 4.015    | 1.5126 | 6.8024 | 1.5768 | 241.2625 |
| P1Cr5     | P | Cr      | B | 0.18  | 0.1183 | 0.0136 | 4.329    | 1.523  | 6.4242 | 1.6396 | 242.0909 |
| P1Cr5     | P | Cr      | B | 0.18  | 0.1183 | 0.0136 | 3.765    | 1.5027 | 6.4311 | 1.5711 | 228.4956 |
| P1Cr5     | P | Cr      | B | 0.18  | 0.1238 | 0.0138 | 3.827    | 1.5133 | 6.4451 | 1.6196 | 261.0268 |
| P1Cr10    | P | Cr      | C | 0.36  | 0.0102 | 0.0012 | 7.01     | 1.9358 | 6.8659 | 2.3222 | 219.4719 |
| P1Cr10    | P | Cr      | C | 0.36  | 0.0111 | 0.0013 | 7.052    | 1.9343 | 6.8713 | 2.2014 | 221.9334 |
| P1Cr10    | P | Cr      | C | 0.36  | 0.0096 | 0.0011 | 6.968    | 1.937  | 6.8704 | 1.5533 | 222.7087 |
| P1Cr10    | P | Cr      | C | 0.36  | 0.0103 | 0.0012 | 7.628    | 1.9373 | 6.1566 | 1.4607 | 221.3713 |
| P1Cr10    | P | Cr      | C | 0.36  | 0.0103 | 0.0012 | 6.392    | 1.9355 | 6.1602 | 2.3119 | 206.3344 |

|           |   |         |   |       |        |        |          |        |        |        |          |
|-----------|---|---------|---|-------|--------|--------|----------|--------|--------|--------|----------|
| P1Cr10    | P | Cr      | C | 0.36  | 0.0105 | 0.0012 | 6.556    | 1.9379 | 6.1656 | 2.1834 | 231.2349 |
| P1Cr25    | P | Cr      | D | 0.90  | 0.0114 | 0.003  | 127.0827 | 3.265  | 7.9127 | 3.2665 | 148.3659 |
| P1Cr25    | P | Cr      | D | 0.90  | 0.0035 | 0.0009 | 127.5435 | 3.3052 | 7.9165 | 3.505  | 151.5294 |
| P1Cr25    | P | Cr      | D | 0.90  | 0.0125 | 0.0033 | 126.6219 | 3.2679 | 7.925  | 3.2773 | 150.0331 |
| P1Cr25    | P | Cr      | D | 0.90  | 0.0091 | 0.0024 | 139.239  | 3.2672 | 8.0797 | 3.5104 | 149.9761 |
| P1Cr25    | P | Cr      | D | 0.90  | 0.0091 | 0.0024 | 114.9255 | 3.3074 | 8.0835 | 3.2529 | 135.0646 |
| P1Cr25    | P | Cr      | D | 0.90  | 0.0092 | 0.0025 | 134.7264 | 3.2685 | 8.093  | 3.486  | 152.8936 |
| P1control | P | control | O | 0     | 0.7665 | 0.071  | 1.538    | 2.5246 | 6.4491 | 0.614  | 239.7521 |
| P1control | P | control | O | 0     | 1.0949 | 0.1015 | 1.548    | 2.5263 | 6.4605 | 0.4982 | 236.582  |
| P1control | P | control | O | 0     | 0.0834 | 0.0077 | 1.528    | 2.5254 | 6.4535 | 0.6491 | 242.232  |
| P1control | P | control | O | 0     | 0.6483 | 0.0601 | 1.551    | 2.5266 | 6.6193 | 0.4907 | 239.522  |
| P1control | P | control | O | 0     | 0.6483 | 0.0601 | 1.525    | 2.5287 | 6.6272 | 0.614  | 234.1651 |
| P1control | P | control | O | 0     | 0.6684 | 0.0603 | 1.519    | 2.526  | 6.6193 | 0.4782 | 250.2915 |
| P1Ni0     | P | Ni      | A | 0.025 | 0.1327 | 0.0157 | 13.3     | 2.0491 | 6.8093 | 1.0164 | 232.2986 |
| P1Ni0     | P | Ni      | A | 0.025 | 0.886  | 0.1047 | 13.748   | 2.0198 | 6.8123 | 1.0136 | 228.0943 |
| P1Ni0     | P | Ni      | A | 0.025 | 0.2587 | 0.0306 | 12.852   | 2.0349 | 6.8182 | 1.0107 | 233.0319 |
| P1Ni0     | P | Ni      | A | 0.025 | 0.4258 | 0.0503 | 13.563   | 2.0504 | 6.2638 | 1.0333 | 231.1416 |
| P1Ni0     | P | Ni      | A | 0.025 | 0.4258 | 0.0503 | 13.037   | 2.0221 | 6.2727 | 1.0023 | 219.4301 |
| P1Ni0     | P | Ni      | A | 0.025 | 0.4346 | 0.0506 | 12.676   | 2.0375 | 6.2727 | 1.0023 | 242.3184 |
| P1Ni5     | P | Ni      | B | 0.125 | 0.0557 | 0.0067 | 27.618   | 2.5932 | 8.0275 | 3.6185 | 194.7418 |
| P1Ni5     | P | Ni      | B | 0.125 | 0.0441 | 0.0053 | 28.297   | 2.5349 | 8.0344 | 3.4274 | 185.4587 |
| P1Ni5     | P | Ni      | B | 0.125 | 0.0721 | 0.0087 | 26.939   | 2.5677 | 8.0413 | 3.6241 | 202.3148 |
| P1Ni5     | P | Ni      | B | 0.125 | 0.0573 | 0.0069 | 30.135   | 2.5949 | 7.9528 | 3.4331 | 194.1718 |
| P1Ni5     | P | Ni      | B | 0.125 | 0.0573 | 0.0069 | 25.1     | 2.5362 | 7.9538 | 3.5988 | 189.0009 |
| P1Ni5     | P | Ni      | B | 0.125 | 0.0591 | 0.0072 | 25.26    | 2.5687 | 7.9528 | 3.4246 | 201.2726 |
| P1Ni10    | P | Ni      | C | 0.25  | 0.0144 | 0.0029 | 98.177   | 2.0995 | 6.7674 | 1.7302 | 189.8667 |
| P1Ni10    | P | Ni      | C | 0.25  | 0.04   | 0.008  | 98.467   | 2.0816 | 6.774  | 1.9429 | 177.7375 |
| P1Ni10    | P | Ni      | C | 0.25  | 0.0275 | 0.0055 | 97.887   | 2.093  | 6.774  | 1.7116 | 198.7154 |
| P1Ni10    | P | Ni      | C | 0.25  | 0.0273 | 0.0055 | 107.197  | 2.1005 | 6.6912 | 1.9748 | 188.7732 |
| P1Ni10    | P | Ni      | C | 0.25  | 0.0273 | 0.0055 | 89.157   | 2.0819 | 6.7023 | 1.7063 | 184.744  |
| P1Ni10    | P | Ni      | C | 0.25  | 0.0281 | 0.0055 | 91.874   | 2.0943 | 6.7033 | 1.9375 | 196.1309 |

|           |   |         |   |           |        |        |          |        |        |        |          |
|-----------|---|---------|---|-----------|--------|--------|----------|--------|--------|--------|----------|
| P1Ni25    | P | Ni      | D | 0.625     | 0.012  | 0.0022 | 123.4709 | 2.7009 | 8.9159 | 5.4683 | 121.0456 |
| P1Ni25    | P | Ni      | D | 0.625     | 0.005  | 0.0009 | 121.6727 | 2.7009 | 8.9266 | 5.4459 | 120.6213 |
| P1Ni25    | P | Ni      | D | 0.625     | 0.0041 | 0.0008 | 125.5412 | 2.7019 | 8.9266 | 5.4906 | 126.6772 |
| P1Ni25    | P | Ni      | D | 0.625     | 0.007  | 0.0013 | 129.0459 | 2.6957 | 9.1663 | 5.4655 | 122.7813 |
| P1Ni25    | P | Ni      | D | 0.625     | 0.007  | 0.0013 | 118.6393 | 2.6986 | 9.1703 | 5.4627 | 118.2087 |
| P1Ni25    | P | Ni      | D | 0.625     | 0.0074 | 0.0013 | 118.0021 | 2.699  | 9.1693 | 5.4319 | 128.1934 |
| P1control | P | control | O | 0         | 0.7665 | 0.071  | 0.349    | 2.5246 | 6.4491 | 0.614  | 239.7521 |
| P1control | P | control | O | 0         | 1.0949 | 0.1015 | 0.375    | 2.5263 | 6.4605 | 0.4982 | 236.582  |
| P1control | P | control | O | 0         | 0.0834 | 0.0077 | 0.323    | 2.5254 | 6.4535 | 0.6491 | 242.232  |
| P1control | P | control | O | 0         | 0.6483 | 0.0601 | 0.384    | 2.5266 | 6.6193 | 0.4907 | 239.522  |
| P1control | P | control | O | 0         | 0.6483 | 0.0601 | 0.315    | 2.5287 | 6.6272 | 0.614  | 234.1651 |
| P1control | P | control | O | 0         | 0.6684 | 0.0603 | 0.3      | 2.526  | 6.6193 | 0.4782 | 250.2915 |
| P1Cd0     | P | Cd      | A | 0.0000945 | 0.3524 | 0.0363 | 1.889    | 2.4822 | 7.5578 | 5.8994 | 191.0488 |
| P1Cd0     | P | Cd      | A | 0.0000945 | 0.4253 | 0.0438 | 2.007    | 2.4577 | 7.5657 | 5.5942 | 186.7421 |
| P1Cd0     | P | Cd      | A | 0.0000945 | 0.2547 | 0.0263 | 1.771    | 2.4708 | 7.5604 | 5.9194 | 193.6149 |
| P1Cd0     | P | Cd      | A | 0.0000945 | 0.3441 | 0.0355 | 1.905    | 2.4828 | 7.7023 | 5.6092 | 190.4686 |
| P1Cd0     | P | Cd      | A | 0.0000945 | 0.3441 | 0.0355 | 1.873    | 2.458  | 7.7067 | 5.8894 | 177.5634 |
| P1Cd0     | P | Cd      | A | 0.0000945 | 0.3504 | 0.0362 | 1.761    | 2.472  | 7.7058 | 5.5692 | 193.5568 |
| P1Cd100   | P | Cd      | B | 0.00945   | 0.051  | 0.0049 | 32.019   | 2.3759 | 7.4918 | 5.6072 | 188.8358 |
| P1Cd100   | P | Cd      | B | 0.00945   | 0.1077 | 0.0102 | 32.086   | 2.2888 | 7.4995 | 5.9558 | 170.9738 |
| P1Cd100   | P | Cd      | B | 0.00945   | 0.0496 | 0.0047 | 31.952   | 2.3349 | 7.5024 | 5.5935 | 199.2853 |
| P1Cd100   | P | Cd      | B | 0.00945   | 0.0694 | 0.0066 | 33.607   | 2.3766 | 7.5985 | 5.9503 | 186.3649 |
| P1Cd100   | P | Cd      | B | 0.00945   | 0.0694 | 0.0066 | 30.431   | 2.2895 | 7.6023 | 5.588  | 180.8385 |
| P1Cd100   | P | Cd      | B | 0.00945   | 0.0712 | 0.0067 | 30.894   | 2.3362 | 7.611  | 5.9476 | 196.4367 |
| P1Cd500   | P | Cd      | C | 0.04725   | 0.0295 | 0.0036 | 114.983  | 2.1398 | 7.5222 | 2.7351 | 133.2844 |
| P1Cd500   | P | Cd      | C | 0.04725   | 0.1022 | 0.0126 | 115.244  | 2.2188 | 7.5275 | 2.6205 | 134.1883 |
| P1Cd500   | P | Cd      | C | 0.04725   | 0.0185 | 0.0023 | 114.722  | 2.1825 | 7.5405 | 2.7301 | 139.2793 |
| P1Cd500   | P | Cd      | C | 0.04725   | 0.0501 | 0.0062 | 128.38   | 2.1407 | 7.367  | 2.613  | 135.584  |
| P1Cd500   | P | Cd      | C | 0.04725   | 0.0501 | 0.0062 | 101.587  | 2.2209 | 7.3697 | 2.7226 | 124.7439 |
| P1Cd500   | P | Cd      | C | 0.04725   | 0.051  | 0.0063 | 105.791  | 2.1831 | 7.3688 | 2.608  | 148.2505 |
| P1Cd1000  | P | Cd      | D | 0.0945    | 0.0063 | 0.0017 | 407.8204 | 2.5011 | 9.8052 | 6.8504 | 98.2847  |

|           |   |         |   |        |        |        |             |        |         |         |          |
|-----------|---|---------|---|--------|--------|--------|-------------|--------|---------|---------|----------|
| P1Cd1000  | P | Cd      | D | 0.0095 | 0.0054 | 0.0015 | 367.8463    | 2.5906 | 9.8061  | 6.683   | 98.215   |
| P1Cd1000  | P | Cd      | D | 0.0945 | 0.0018 | 0.0005 | 382.8388    | 2.5981 | 9.8188  | 6.8556  | 104.8978 |
| P1Cd1000  | P | Cd      | D | 0.0945 | 0.0045 | 0.0012 | 294.6212    | 2.5017 | 9.6673  | 6.6727  | 100.4658 |
| P1Cd1000  | P | Cd      | D | 0.0945 | 0.0045 | 0.0012 | 453.5602    | 2.5927 | 9.6763  | 6.8273  | 94.7941  |
| P1Cd1000  | P | Cd      | D | 0.0945 | 0.0047 | 0.0013 | 403.063     | 2.5984 | 9.6772  | 6.6572  | 106.4086 |
| P1control | P | control | 0 | 0      | 0.7665 | 0.071  | 21.082      | 2.5246 | 6.4491  | 0.614   | 239.7521 |
| P1control | P | control | 0 | 0      | 1.0949 | 0.1015 | 21.979      | 2.5263 | 6.4605  | 0.4982  | 236.582  |
| P1control | P | control | 0 | 0      | 0.0834 | 0.0077 | 20.185      | 2.5254 | 6.4535  | 0.6491  | 242.232  |
| P1control | P | control | 0 | 0      | 0.6483 | 0.0601 | 22.878      | 2.5266 | 6.6193  | 0.4907  | 239.522  |
| P1control | P | control | 0 | 0      | 0.6483 | 0.0601 | 19.287      | 2.5287 | 6.6272  | 0.614   | 234.1651 |
| P1control | P | control | 0 | 0      | 0.6684 | 0.0603 | 18.988      | 2.526  | 6.6193  | 0.4782  | 250.2915 |
| P1Zn0     | P | Zn      | A | 0.28   | 0.0651 | 0.0097 | 680.684     | 0.9534 | 6.5747  | 1.5055  | 211.6799 |
| P1Zn0     | P | Zn      | A | 0.28   | 0.0447 | 0.0067 | 681.202     | 1.0671 | 6.5781  | 1.9097  | 208.2433 |
| P1Zn0     | P | Zn      | A | 0.28   | 0.0278 | 0.0042 | 680.166     | 1.0124 | 6.5859  | 1.5179  | 214.9838 |
| P1Zn0     | P | Zn      | A | 0.28   | 0.0459 | 0.0069 | 754.751     | 0.954  | 6.3099  | 1.942   | 211.6357 |
| P1Zn0     | P | Zn      | A | 0.28   | 0.0459 | 0.0069 | 606.618     | 1.0683 | 6.3194  | 1.4931  | 196.7124 |
| P1Zn0     | P | Zn      | A | 0.28   | 0.0474 | 0.0069 | 630.788     | 1.0136 | 6.3255  | 1.9097  | 213.8532 |
| P1Zn2     | P | Zn      | B | 0.56   | 0.0432 | 0.006  | 910.31      | 2.308  | 7.4259  | 3.6529  | 135.458  |
| P1Zn2     | P | Zn      | B | 0.56   | 0.0624 | 0.0087 | 910.889     | 2.3695 | 7.4306  | 3.0337  | 126.0093 |
| P1Zn2     | P | Zn      | B | 0.56   | 0.0584 | 0.0081 | 909.731     | 2.3406 | 7.4268  | 3.6502  | 141.7282 |
| P1Zn2     | P | Zn      | B | 0.56   | 0.0547 | 0.0076 | 947.586     | 2.3089 | 7.3203  | 3.0418  | 134.3985 |
| P1Zn2     | P | Zn      | B | 0.56   | 0.0547 | 0.0076 | 873.034     | 2.3707 | 7.3251  | 3.6257  | 125.3193 |
| P1Zn2     | P | Zn      | B | 0.56   | 0.0554 | 0.0076 | 884.881     | 2.3428 | 7.3356  | 3.031   | 139.2336 |
| P1Zn4     | P | Zn      | C | 1.12   | 0.0225 | 0.0071 | 1109.276    | 2.3624 | 8.1609  | 4.387   | 122.9137 |
| P1Zn4     | P | Zn      | C | 1.12   | 0.0472 | 0.0149 | 1109.973    | 2.3474 | 8.1686  | 4.2392  | 122.5672 |
| P1Zn4     | P | Zn      | C | 1.12   | 0.0168 | 0.0053 | 1108.579    | 2.3576 | 8.1734  | 4.3706  | 125.165  |
| P1Zn4     | P | Zn      | C | 1.12   | 0.0288 | 0.0091 | 1136.819    | 2.3624 | 11.0738 | 4.2693  | 123.5486 |
| P1Zn4     | P | Zn      | C | 1.12   | 0.0288 | 0.0091 | 1081.734    | 2.3487 | 11.0814 | 4.3623  | 122.7138 |
| P1Zn4     | P | Zn      | C | 1.12   | 0.0296 | 0.0095 | 1090.217    | 2.3589 | 11.0862 | 4.2255  | 125.5331 |
| P1Zn10    | P | Zn      | D | 2.8    | 0.0065 | 0.0018 | 2183.094783 | 6.1826 | 13.5822 | 14.2291 | 58.716   |
| P1Zn10    | P | Zn      | D | 2.8    | 0.003  | 0.0009 | 2185.36087  | 6.1887 | 13.585  | 14.0264 | 58.1353  |

|        |   |    |   |     |        |        |             |        |         |         |         |
|--------|---|----|---|-----|--------|--------|-------------|--------|---------|---------|---------|
| P1Zn10 | P | Zn | D | 2.8 | 0.0013 | 0.0004 | 2180.828696 | 6.1887 | 13.5822 | 14.2621 | 58.5863 |
| P1Zn10 | P | Zn | D | 2.8 | 0.0036 | 0.001  | 2201.977826 | 6.1854 | 13.4058 | 14.05   | 58.4792 |
| P1Zn10 | P | Zn | D | 2.8 | 0.0036 | 0.001  | 2164.212174 | 6.192  | 13.416  | 14.1867 | 55.3773 |
| P1Zn10 | P | Zn | D | 2.8 | 0.0036 | 0.0011 | 2193.417391 | 6.1925 | 13.4095 | 14.017  | 60.1959 |
