# Supplementary material for: Production of Antioxidant Molecules in Polygonum aviculare (L.) and Senecio vulgaris (L.) under Metal Stress: A Possible Tool in the Evaluation of Plant Metal Tolerance
Source: MDPI journal article supplement (doi:10.3390/ijms21197317), 2020-10-03
Supplement: s1 [file s1]

**Supplementary Table S2.** Complete dataset of *Senecio vulgaris*.

| Sample    | populat | treatment | factor_conc | metal_conc | fresh_wt | dry_wt | metal_ppm_shoot | flavon | polyp  | act_antiox | photo_pigm |
|-----------|---------|-----------|-------------|------------|----------|--------|-----------------|--------|--------|------------|------------|
| B2control | B       | control   | 0           | 0          | 1.2467   | 0.3181 | 6.617           | 0.3354 | 1.0502 | 0.3889     | 117.8779   |
| B2control | B       | control   | 0           | 0          | 0.8355   | 0.2132 | 6.8             | 0.3245 | 1.0506 | 0.3677     | 116.6123   |
| B2control | B       | control   | 0           | 0          | 0.4312   | 0.11   | 6.434           | 0.33   | 1.0509 | 0.3879     | 120.9179   |
| B2control | B       | control   | 0           | 0          | 0.8378   | 0.2138 | 6.984           | 0.3361 | 1.0654 | 0.3672     | 118.4694   |
| B2control | B       | control   | 0           | 0          | 0.8378   | 0.2138 | 6.25            | 0.3245 | 1.0654 | 0.3869     | 112.566    |
| B2control | B       | control   | 0           | 0          | 0.8671   | 0.2188 | 6.678           | 0.3301 | 1.0685 | 0.367      | 126.1357   |
| B2Cu1/2   | B       | Cu        | A           | 0.13       | 0.0972   | 0.018  | 31.784          | 0.5824 | 1.0461 | 0.2442     | 115.5976   |
| B2Cu1/2   | B       | Cu        | A           | 0.13       | 0.0594   | 0.011  | 32.539          | 0.5871 | 1.0466 | 0.1606     | 115.306    |
| B2Cu1/2   | B       | Cu        | A           | 0.13       | 0.0824   | 0.0153 | 31.029          | 0.5861 | 1.0469 | 0.2465     | 116.8968   |
| B2Cu1/2   | B       | Cu        | A           | 0.13       | 0.0797   | 0.0148 | 33.374          | 0.5829 | 1.0188 | 0.1604     | 115.9335   |
| B2Cu1/2   | B       | Cu        | A           | 0.13       | 0.0797   | 0.0148 | 30.194          | 0.5872 | 1.0199 | 0.2436     | 105.2347   |
| B2Cu1/2   | B       | Cu        | A           | 0.13       | 0.0813   | 0.0152 | 32.089          | 0.5868 | 1.0206 | 0.1584     | 117.4066   |
| B2Cu0     | B       | Cu        | B           | 0.26       | 0.0523   | 0.0124 | 39.169          | 0.5794 | 1.1802 | 0.395      | 113.9439   |
| B2Cu0     | B       | Cu        | B           | 0.26       | 0.0442   | 0.0105 | 42.819          | 0.5619 | 1.1815 | 0.3827     | 115.1558   |
| B2Cu0     | B       | Cu        | B           | 0.26       | 0.0427   | 0.0101 | 35.519          | 0.5709 | 1.1822 | 0.3981     | 113.2563   |
| B2Cu0     | B       | Cu        | B           | 0.26       | 0.0464   | 0.011  | 41.276          | 0.5795 | 1.1833 | 0.3852     | 114.1187   |
| B2Cu0     | B       | Cu        | B           | 0.26       | 0.0464   | 0.011  | 37.061          | 0.5622 | 1.1848 | 0.3936     | 113.1842   |
| B2Cu0     | B       | Cu        | B           | 0.26       | 0.0479   | 0.011  | 36.923          | 0.5715 | 1.1866 | 0.3808     | 121.2547   |
| B2Cu2.5   | B       | Cu        | C           | 0.65       | 0.0211   | 0.0047 | 63.606          | 0.6046 | 1.066  | 0.4077     | 64.2212    |
| B2Cu2.5   | B       | Cu        | C           | 0.65       | 0.0305   | 0.0068 | 59.748          | 0.5909 | 1.0671 | 0.3921     | 65.1966    |
| B2Cu2.5   | B       | Cu        | C           | 0.65       | 0.0374   | 0.0084 | 47.464          | 0.5833 | 1.0674 | 0.4111     | 65.4331    |
| B2Cu2.5   | B       | Cu        | C           | 0.65       | 0.0297   | 0.0066 | 65.318          | 0.6053 | 1.0655 | 0.391      | 64.9503    |
| B2Cu2.5   | B       | Cu        | C           | 0.65       | 0.0297   | 0.0066 | 61.894          | 0.5915 | 1.0655 | 0.4077     | 61.071     |
| B2Cu2.5   | B       | Cu        | C           | 0.65       | 0.0312   | 0.0068 | 58.605          | 0.5834 | 1.0677 | 0.39       | 66.2302    |
| B2Cu5     | B       | Cu        | D           | 1.3        | 0.0021   | 0.001  | 411.001         | 0.9549 | 1.4642 | 0.5917     | 52.0942    |
| B2Cu5     | B       | Cu        | D           | 1.3        | 0.0029   | 0.0014 | 445.421         | 0.9692 | 1.4652 | 0.6065     | 61.2375    |
| B2Cu5     | B       | Cu        | D           | 1.3        | 0.0233   | 0.011  | 376.58          | 0.9622 | 1.4664 | 0.5928     | 60.019     |
| B2Cu5     | B       | Cu        | D           | 1.3        | 0.0094   | 0.0044 | 419.749         | 0.9555 | 1.4417 | 0.6044     | 61.4701    |

|           |   |         |   |       |        |        |          |        |        |        |          |
|-----------|---|---------|---|-------|--------|--------|----------|--------|--------|--------|----------|
| B2Cu5     | B | Cu      | D | 1.3   | 0.0094 | 0.0045 | 402.252  | 0.9697 | 1.4433 | 0.5897 | 58.9301  |
| B2Cu5     | B | Cu      | D | 1.3   | 0.0097 | 0.0045 | 382.413  | 0.9629 | 1.4419 | 0.6044 | 62.945   |
| B2control | B | control | 0 | 0     | 1.2467 | 0.3181 | 0.297    | 0.3354 | 1.0502 | 0.3889 | 117.8779 |
| B2control | B | control | 0 | 0     | 0.8355 | 0.2132 | 0.317    | 0.3245 | 1.0506 | 0.3677 | 116.6123 |
| B2control | B | control | 0 | 0     | 0.4312 | 0.11   | 0.277    | 0.33   | 1.0509 | 0.3879 | 120.9179 |
| B2control | B | control | 0 | 0     | 0.8378 | 0.2138 | 0.335    | 0.3361 | 1.0654 | 0.3672 | 118.4694 |
| B2control | B | control | 0 | 0     | 0.8378 | 0.2138 | 0.258    | 0.3245 | 1.0654 | 0.3869 | 112.566  |
| B2control | B | control | 0 | 0     | 0.8671 | 0.2188 | 0.302    | 0.3301 | 1.0685 | 0.367  | 126.1357 |
| B2Pb0     | B | Pb      | A | 0.025 | 0.2082 | 0.0444 | 7.005    | 0.1806 | 1.0526 | 0.3323 | 126.3889 |
| B2Pb0     | B | Pb      | A | 0.025 | 0.3389 | 0.0723 | 8.247    | 0.2232 | 1.054  | 0.324  | 124.1155 |
| B2Pb0     | B | Pb      | A | 0.025 | 0.3426 | 0.0731 | 5.762    | 0.2288 | 1.0544 | 0.3337 | 129.2644 |
| B2Pb0     | B | Pb      | A | 0.025 | 0.2966 | 0.0633 | 7.308    | 0.1807 | 1.0392 | 0.3268 | 126.5896 |
| B2Pb0     | B | Pb      | A | 0.025 | 0.2966 | 0.0633 | 6.701    | 0.2236 | 1.0395 | 0.3305 | 117.772  |
| B2Pb0     | B | Pb      | A | 0.025 | 0.3097 | 0.0656 | 5.965    | 0.2292 | 1.0398 | 0.3221 | 127.694  |
| B2Pb10    | B | Pb      | B | 0.25  | 0.0617 | 0.015  | 372.446  | 0.273  | 1.0702 | 0.32   | 145.0207 |
| B2Pb10    | B | Pb      | B | 0.25  | 0.1512 | 0.0368 | 402.383  | 0.2745 | 1.0712 | 0.2925 | 143.6079 |
| B2Pb10    | B | Pb      | B | 0.25  | 0.0441 | 0.0107 | 342.508  | 0.2741 | 1.0717 | 0.3177 | 147.182  |
| B2Pb10    | B | Pb      | B | 0.25  | 0.0857 | 0.0208 | 381.739  | 0.2733 | 1.0609 | 0.2914 | 145.2702 |
| B2Pb10    | B | Pb      | B | 0.25  | 0.0857 | 0.0208 | 363.153  | 0.2748 | 1.0617 | 0.3177 | 131.9969 |
| B2Pb10    | B | Pb      | B | 0.25  | 0.089  | 0.0215 | 348.704  | 0.2744 | 1.0633 | 0.2909 | 148.9507 |
| B2Pb50    | B | Pb      | C | 1.25  | 0.0276 | 0.0069 | 762.901  | 0.9149 | 1.5357 | 0.0871 | 55.3173  |
| B2Pb50    | B | Pb      | C | 1.25  | 0.0061 | 0.0015 | 895.108  | 0.9521 | 1.5357 | 0.0948 | 55.6364  |
| B2Pb50    | B | Pb      | C | 1.25  | 0.0088 | 0.0022 | 630.693  | 0.9782 | 1.5391 | 0.0876 | 57.5341  |
| B2Pb50    | B | Pb      | C | 1.25  | 0.0142 | 0.0035 | 799.195  | 0.9154 | 1.5036 | 0.0976 | 56.1626  |
| B2Pb50    | B | Pb      | C | 1.25  | 0.0142 | 0.0035 | 726.606  | 0.9529 | 1.5067 | 0.0861 | 55.6887  |
| B2Pb50    | B | Pb      | C | 1.25  | 0.0144 | 0.0036 | 654.889  | 0.9789 | 1.5053 | 0.0924 | 60.4464  |
| B2Pb100   | B | Pb      | D | 2.5   | 0.0089 | 0.0029 | 3082.151 | 0.8957 | 1.3804 | 0.0985 | 65.9135  |
| B2Pb100   | B | Pb      | D | 2.5   | 0.0126 | 0.0042 | 3362.33  | 0.8754 | 1.3818 | 0.1129 | 67.4385  |
| B2Pb100   | B | Pb      | D | 2.5   | 0.0152 | 0.005  | 2801.972 | 0.8873 | 1.3848 | 0.1021 | 70.5858  |
| B2Pb100   | B | Pb      | D | 2.5   | 0.0122 | 0.004  | 3155.325 | 0.8962 | 1.401  | 0.1144 | 67.9793  |
| B2Pb100   | B | Pb      | D | 2.5   | 0.0122 | 0.004  | 3008.976 | 0.8762 | 1.4029 | 0.0974 | 61.4841  |

|           |   |         |   |       |        |        |          |        |        |        |          |
|-----------|---|---------|---|-------|--------|--------|----------|--------|--------|--------|----------|
| B2Pb100   | B | Pb      | D | 2.5   | 0.0128 | 0.0042 | 2850.755 | 0.8883 | 1.4013 | 0.1129 | 70.4807  |
| B2control | B | control | 0 | 0     | 1.2467 | 0.3181 | 8.042    | 0.3354 | 1.0502 | 0.3889 | 117.8779 |
| B2control | B | control | 0 | 0     | 0.8355 | 0.2132 | 8.127    | 0.3245 | 1.0506 | 0.3677 | 116.6123 |
| B2control | B | control | 0 | 0     | 0.4312 | 0.11   | 7.957    | 0.33   | 1.0509 | 0.3879 | 120.9179 |
| B2control | B | control | 0 | 0     | 0.8378 | 0.2138 | 8.612    | 0.3361 | 1.0654 | 0.3672 | 118.4694 |
| B2control | B | control | 0 | 0     | 0.8378 | 0.2138 | 7.472    | 0.3245 | 1.0654 | 0.3869 | 112.566  |
| B2control | B | control | 0 | 0     | 0.8671 | 0.2188 | 8.337    | 0.3301 | 1.0685 | 0.367  | 126.1357 |
| B2Cr0     | B | Cr      | A | 0.036 | 0.4346 | 0.1037 | 1.456    | 0.3115 | 1.012  | 0.3725 | 170.6848 |
| B2Cr0     | B | Cr      | A | 0.036 | 0.2975 | 0.071  | 2.109    | 0.3601 | 1.0129 | 0.3494 | 173.8281 |
| B2Cr0     | B | Cr      | A | 0.036 | 0.5782 | 0.138  | 1.804    | 0.3445 | 1.0129 | 0.3756 | 169.8687 |
| B2Cr0     | B | Cr      | A | 0.036 | 0.4368 | 0.1042 | 1.59     | 0.3122 | 1.0027 | 0.3522 | 171.4605 |
| B2Cr0     | B | Cr      | A | 0.036 | 0.4368 | 0.1042 | 1.522    | 0.3604 | 1.0038 | 0.3714 | 159.1687 |
| B2Cr0     | B | Cr      | A | 0.036 | 0.4463 | 0.1089 | 1.893    | 0.345  | 1.0032 | 0.3491 | 186.4534 |
| B2Cr5     | B | Cr      | B | 0.18  | 0.2055 | 0.0495 | 211.852  | 0.4312 | 1.0499 | 0.3314 | 120.5663 |
| B2Cr5     | B | Cr      | B | 0.18  | 0.137  | 0.033  | 231.451  | 0.4337 | 1.0517 | 0.3245 | 121.6125 |
| B2Cr5     | B | Cr      | B | 0.18  | 0.4251 | 0.1024 | 192.252  | 0.4333 | 1.0517 | 0.3322 | 124.6411 |
| B2Cr5     | B | Cr      | B | 0.18  | 0.2559 | 0.0616 | 232.669  | 0.4312 | 1.0667 | 0.3242 | 122.2733 |
| B2Cr5     | B | Cr      | B | 0.18  | 0.2559 | 0.0616 | 191.034  | 0.4338 | 1.0671 | 0.3289 | 112.2911 |
| B2Cr5     | B | Cr      | B | 0.18  | 0.2657 | 0.0645 | 206.131  | 0.4335 | 1.0679 | 0.3223 | 125.09   |
| B2Cr10    | B | Cr      | C | 0.36  | 0.0549 | 0.0115 | 810.851  | 0.5771 | 1.1463 | 0.3676 | 122.9956 |
| B2Cr10    | B | Cr      | C | 0.36  | 0.0853 | 0.0179 | 830.45   | 0.5864 | 1.1475 | 0.3007 | 125.8638 |
| B2Cr10    | B | Cr      | C | 0.36  | 0.121  | 0.0254 | 791.252  | 0.5826 | 1.1463 | 0.3702 | 119.9697 |
| B2Cr10    | B | Cr      | C | 0.36  | 0.0871 | 0.0183 | 828.5    | 0.5771 | 1.1285 | 0.3007 | 122.9431 |
| B2Cr10    | B | Cr      | C | 0.36  | 0.0871 | 0.0183 | 793.202  | 0.5866 | 1.1296 | 0.3668 | 114.3073 |
| B2Cr10    | B | Cr      | C | 0.36  | 0.0906 | 0.019  | 803.018  | 0.5831 | 1.1296 | 0.2993 | 131.1531 |
| B2Cr25    | B | Cr      | D | 0.9   | 0.0941 | 0.018  | 861.471  | 0.87   | 1.6083 | 0.4264 | 82.4404  |
| B2Cr25    | B | Cr      | D | 0.9   | 0.0322 | 0.0062 | 934.918  | 0.8284 | 1.6092 | 0.3451 | 80.9327  |
| B2Cr25    | B | Cr      | D | 0.9   | 0.038  | 0.0073 | 788.024  | 0.8121 | 1.612  | 0.4275 | 83.1595  |
| B2Cr25    | B | Cr      | D | 0.9   | 0.0548 | 0.0105 | 929.705  | 0.8703 | 1.6152 | 0.3518 | 82.1775  |
| B2Cr25    | B | Cr      | D | 0.9   | 0.0548 | 0.0105 | 793.237  | 0.8293 | 1.6163 | 0.4241 | 82.119   |
| B2Cr25    | B | Cr      | D | 0.9   | 0.0562 | 0.011  | 833.513  | 0.8127 | 1.6165 | 0.3451 | 89.0919  |

|           |   |         |   |       |        |        |          |        |        |        |          |
|-----------|---|---------|---|-------|--------|--------|----------|--------|--------|--------|----------|
| B2control | B | control | 0 | 0     | 1.2467 | 0.3181 | 1.587    | 0.3354 | 1.0502 | 0.3889 | 117.8779 |
| B2control | B | control | 0 | 0     | 0.8355 | 0.2132 | 1.597    | 0.3245 | 1.0506 | 0.3677 | 116.6123 |
| B2control | B | control | 0 | 0     | 0.4312 | 0.11   | 1.577    | 0.33   | 1.0509 | 0.3879 | 120.9179 |
| B2control | B | control | 0 | 0     | 0.8378 | 0.2138 | 1.6      | 0.3361 | 1.0654 | 0.3672 | 118.4694 |
| B2control | B | control | 0 | 0     | 0.8378 | 0.2138 | 1.575    | 0.3245 | 1.0654 | 0.3869 | 112.566  |
| B2control | B | control | 0 | 0     | 0.8671 | 0.2188 | 1.586    | 0.3301 | 1.0685 | 0.367  | 126.1357 |
| B2Ni0     | B | Ni      | A | 0.025 | 0.822  | 0.1838 | 21.497   | 0.3481 | 1.0087 | 0.3256 | 115.0172 |
| B2Ni0     | B | Ni      | A | 0.025 | 0.4522 | 0.1011 | 18.874   | 0.3493 | 1.0101 | 0.3245 | 114.5151 |
| B2Ni0     | B | Ni      | A | 0.025 | 0.9052 | 0.2024 | 17.12    | 0.3493 | 1.0098 | 0.3261 | 118.5033 |
| B2Ni0     | B | Ni      | A | 0.025 | 0.7265 | 0.1625 | 22.949   | 0.3482 | 0.9859 | 0.3235 | 116.0119 |
| B2Ni0     | B | Ni      | A | 0.025 | 0.7265 | 0.1625 | 20.045   | 0.3498 | 0.9861 | 0.3247 | 114.994  |
| B2Ni0     | B | Ni      | A | 0.025 | 0.7294 | 0.1666 | 17.088   | 0.3495 | 0.9861 | 0.3226 | 118.0939 |
| B2Ni5     | B | Ni      | B | 0.125 | 0.8638 | 0.2303 | 70.789   | 0.3207 | 1.0761 | 0.3356 | 125.8911 |
| B2Ni5     | B | Ni      | B | 0.125 | 1.0259 | 0.2735 | 81.298   | 0.2466 | 1.0764 | 0.3197 | 130.5946 |
| B2Ni5     | B | Ni      | B | 0.125 | 0.7485 | 0.1995 | 66.28    | 0.2839 | 1.0769 | 0.3392 | 127.1433 |
| B2Ni5     | B | Ni      | B | 0.125 | 0.8794 | 0.2344 | 71.679   | 0.3208 | 1.0711 | 0.3225 | 127.8764 |
| B2Ni5     | B | Ni      | B | 0.125 | 0.8794 | 0.2344 | 69.9     | 0.2471 | 1.0719 | 0.3353 | 121.3097 |
| B2Ni5     | B | Ni      | B | 0.125 | 0.884  | 0.2345 | 56.874   | 0.284  | 1.0712 | 0.3189 | 139.6396 |
| B2Ni10    | B | Ni      | C | 0.25  | 0.2874 | 0.0736 | 130.996  | 0.3524 | 1.053  | 0.2664 | 44.4146  |
| B2Ni10    | B | Ni      | C | 0.25  | 0.7924 | 0.203  | 146.316  | 0.3435 | 1.0543 | 0.2971 | 46.0563  |
| B2Ni10    | B | Ni      | C | 0.25  | 0.2241 | 0.0574 | 115.676  | 0.349  | 1.0559 | 0.2667 | 49.1032  |
| B2Ni10    | B | Ni      | C | 0.25  | 0.4346 | 0.1113 | 131.732  | 0.3529 | 1.0646 | 0.2974 | 46.5247  |
| B2Ni10    | B | Ni      | C | 0.25  | 0.4346 | 0.1113 | 130.26   | 0.3437 | 1.0646 | 0.2656 | 42.6946  |
| B2Ni10    | B | Ni      | C | 0.25  | 0.4557 | 0.1154 | 116.167  | 0.3497 | 1.0676 | 0.2949 | 48.1457  |
| B2Ni25    | B | Ni      | D | 0.625 | 0.2261 | 0.0672 | 187.3243 | 0.5053 | 1.3711 | 0.5314 | 50.788   |
| B2Ni25    | B | Ni      | D | 0.625 | 0.1028 | 0.0305 | 209.2319 | 0.5328 | 1.3728 | 0.5112 | 47.0033  |
| B2Ni25    | B | Ni      | D | 0.625 | 0.1043 | 0.031  | 165.4167 | 0.4888 | 1.3743 | 0.5302 | 51.2206  |
| B2Ni25    | B | Ni      | D | 0.625 | 0.1444 | 0.0429 | 188.3768 | 0.5058 | 1.3786 | 0.5089 | 52.7554  |
| B2Ni25    | B | Ni      | D | 0.625 | 0.1444 | 0.0429 | 186.2718 | 0.533  | 1.3801 | 0.5294 | 50.1577  |
| B2Ni25    | B | Ni      | D | 0.625 | 0.1512 | 0.0438 | 166.1188 | 0.4889 | 1.3791 | 0.5089 | 51.3442  |
| B2control | B | control | 0 | 0     | 1.2467 | 0.3181 | 0.374    | 0.3354 | 1.0502 | 0.3889 | 117.8779 |

|           |   |         |   |           |        |        |         |        |        |        |          |
|-----------|---|---------|---|-----------|--------|--------|---------|--------|--------|--------|----------|
| B2control | B | control | 0 | 0         | 0.8355 | 0.2132 | 0.4     | 0.3245 | 1.0506 | 0.3677 | 116.6123 |
| B2control | B | control | 0 | 0         | 0.4312 | 0.11   | 0.348   | 0.33   | 1.0509 | 0.3879 | 120.9179 |
| B2control | B | control | 0 | 0         | 0.8378 | 0.2138 | 0.394   | 0.3361 | 1.0654 | 0.3672 | 118.4694 |
| B2control | B | control | 0 | 0         | 0.8378 | 0.2138 | 0.355   | 0.3245 | 1.0654 | 0.3869 | 112.566  |
| B2control | B | control | 0 | 0         | 0.8671 | 0.2188 | 0.328   | 0.3301 | 1.0685 | 0.367  | 126.1357 |
| B2Cd0     | B | Cd      | A | 0.0000945 | 0.7619 | 0.1471 | 2.113   | 0.2376 | 0.9831 | 0.3087 | 137.977  |
| B2Cd0     | B | Cd      | A | 0.0000945 | 0.4654 | 0.0898 | 2.603   | 0.2939 | 0.9845 | 0.311  | 136.6569 |
| B2Cd0     | B | Cd      | A | 0.0000945 | 0.4807 | 0.0928 | 2.024   | 0.2661 | 0.9845 | 0.3125 | 140.8853 |
| B2Cd0     | B | Cd      | A | 0.0000945 | 0.5693 | 0.1099 | 2.222   | 0.2382 | 0.959  | 0.3095 | 138.5064 |
| B2Cd0     | B | Cd      | A | 0.0000945 | 0.5693 | 0.1099 | 2.005   | 0.2942 | 0.9602 | 0.3077 | 124.8559 |
| B2Cd0     | B | Cd      | A | 0.0000945 | 0.5744 | 0.1138 | 2.097   | 0.2666 | 0.9611 | 0.3087 | 146.7143 |
| B2Cd100   | B | Cd      | B | 0.00945   | 0.2264 | 0.065  | 255.787 | 0.325  | 0.8736 | 0.2285 | 116.7785 |
| B2Cd100   | B | Cd      | B | 0.00945   | 0.2728 | 0.0783 | 255.361 | 0.331  | 0.8739 | 0.2085 | 117.5334 |
| B2Cd100   | B | Cd      | B | 0.00945   | 0.1504 | 0.0432 | 246.213 | 0.328  | 0.8742 | 0.2292 | 119.0247 |
| B2Cd100   | B | Cd      | B | 0.00945   | 0.2165 | 0.0621 | 271.38  | 0.3257 | 0.8736 | 0.2093 | 117.7789 |
| B2Cd100   | B | Cd      | B | 0.00945   | 0.2165 | 0.0622 | 240.195 | 0.3312 | 0.8742 | 0.2262 | 115.2911 |
| B2Cd100   | B | Cd      | B | 0.00945   | 0.2237 | 0.0652 | 246.609 | 0.3281 | 0.8741 | 0.2065 | 124.6508 |
| B2Cd500   | B | Cd      | C | 0.04725   | 0.1353 | 0.0346 | 645.75  | 0.4432 | 0.9012 | 0.1427 | 51.9126  |
| B2Cd500   | B | Cd      | C | 0.04725   | 0.2072 | 0.053  | 647.593 | 0.4001 | 0.9017 | 0.167  | 52.2894  |
| B2Cd500   | B | Cd      | C | 0.04725   | 0.1777 | 0.0455 | 643.907 | 0.3778 | 0.902  | 0.1453 | 55.2906  |
| B2Cd500   | B | Cd      | C | 0.04725   | 0.1734 | 0.0444 | 672.233 | 0.4439 | 0.9249 | 0.1673 | 53.1642  |
| B2Cd500   | B | Cd      | C | 0.04725   | 0.1734 | 0.0444 | 619.267 | 0.4006 | 0.9264 | 0.1407 | 52.7331  |
| B2Cd500   | B | Cd      | C | 0.04725   | 0.18   | 0.0465 | 626.252 | 0.3778 | 0.9264 | 0.1665 | 55.3535  |
| B2Cd1000  | B | Cd      | D | 0.0945    | 0.1122 | 0.0266 | 709.647 | 1.4142 | 1.3629 | 0.2323 | 69.5738  |
| B2Cd1000  | B | Cd      | D | 0.0945    | 0.09   | 0.0214 | 659.107 | 1.3208 | 1.3645 | 0.2205 | 70.7655  |
| B2Cd1000  | B | Cd      | D | 0.0945    | 0.0977 | 0.0232 | 760.187 | 1.3208 | 1.3652 | 0.2358 | 72.5523  |
| B2Cd1000  | B | Cd      | D | 0.0945    | 0.1    | 0.0237 | 713.18  | 1.4144 | 1.3512 | 0.2213 | 70.9639  |
| B2Cd1000  | B | Cd      | D | 0.0945    | 0.1    | 0.0237 | 706.114 | 1.3215 | 1.3517 | 0.2319 | 70.1433  |
| B2Cd1000  | B | Cd      | D | 0.0945    | 0.1011 | 0.0241 | 657.831 | 1.3217 | 1.3553 | 0.2189 | 72.2157  |
| B2control | B | control | 0 | 0         | 1.2467 | 0.3181 | 38.87   | 0.3354 | 1.0502 | 0.3889 | 117.8779 |
| B2control | B | control | 0 | 0         | 0.8355 | 0.2132 | 39.767  | 0.3245 | 1.0506 | 0.3677 | 116.6123 |

|           |   |         |   |      |        |        |          |        |        |        |          |
|-----------|---|---------|---|------|--------|--------|----------|--------|--------|--------|----------|
| B2control | B | control | 0 | 0    | 0.4312 | 0.11   | 37.973   | 0.33   | 1.0509 | 0.3879 | 120.9179 |
| B2control | B | control | 0 | 0    | 0.8378 | 0.2138 | 39.283   | 0.3361 | 1.0654 | 0.3672 | 118.4694 |
| B2control | B | control | 0 | 0    | 0.8378 | 0.2138 | 38.456   | 0.3245 | 1.0654 | 0.3869 | 112.566  |
| B2control | B | control | 0 | 0    | 0.8671 | 0.2188 | 37.697   | 0.3301 | 1.0685 | 0.367  | 126.1357 |
| B2Zn0     | B | Zn      | A | 0.28 | 0.2192 | 0.0226 | 543.051  | 0.3287 | 1.0318 | 0.3058 | 126.542  |
| B2Zn0     | B | Zn      | A | 0.28 | 0.4001 | 0.0413 | 544.816  | 0.3267 | 1.032  | 0.3259 | 120.9752 |
| B2Zn0     | B | Zn      | A | 0.28 | 0.1503 | 0.0155 | 541.286  | 0.3282 | 1.0339 | 0.3096 | 132.6186 |
| B2Zn0     | B | Zn      | A | 0.28 | 0.2565 | 0.0265 | 565.151  | 0.329  | 1.0635 | 0.3248 | 126.712  |
| B2Zn0     | B | Zn      | A | 0.28 | 0.2565 | 0.0265 | 520.952  | 0.3274 | 1.065  | 0.3055 | 124.5271 |
| B2Zn0     | B | Zn      | A | 0.28 | 0.2569 | 0.0272 | 526.553  | 0.3286 | 1.065  | 0.3235 | 138.8013 |
| B2Zn2     | B | Zn      | B | 0.56 | 0.4413 | 0.1175 | 1481.21  | 0.335  | 1.0192 | 0.3478 | 88.1376  |
| B2Zn2     | B | Zn      | B | 0.56 | 0.2491 | 0.0663 | 1569.176 | 0.3246 | 1.0195 | 0.3412 | 87.9164  |
| B2Zn2     | B | Zn      | B | 0.56 | 0.4011 | 0.1068 | 1393.245 | 0.3233 | 1.02   | 0.3481 | 92.1762  |
| B2Zn2     | B | Zn      | B | 0.56 | 0.3638 | 0.0968 | 1504.489 | 0.3351 | 1.0353 | 0.3435 | 89.4101  |
| B2Zn2     | B | Zn      | B | 0.56 | 0.3638 | 0.0969 | 1457.932 | 0.3248 | 1.0364 | 0.3465 | 83.1558  |
| B2Zn2     | B | Zn      | B | 0.56 | 0.3811 | 0.1003 | 1377.726 | 0.3237 | 1.0361 | 0.3407 | 91.2912  |
| B2Zn4     | B | Zn      | C | 1.12 | 0.1965 | 0.0451 | 1626.366 | 0.6378 | 1.2848 | 0.4628 | 51.0465  |
| B2Zn4     | B | Zn      | C | 1.12 | 0.0525 | 0.012  | 1627.333 | 0.6335 | 1.2863 | 0.4225 | 49.498   |
| B2Zn4     | B | Zn      | C | 1.12 | 0.1706 | 0.0391 | 1625.399 | 0.6357 | 1.2868 | 0.463  | 57.7216  |
| B2Zn4     | B | Zn      | C | 1.12 | 0.1399 | 0.0321 | 1655.272 | 0.6383 | 1.2574 | 0.4222 | 52.7554  |
| B2Zn4     | B | Zn      | C | 1.12 | 0.1399 | 0.0321 | 1597.46  | 0.6338 | 1.2578 | 0.462  | 50.3715  |
| B2Zn4     | B | Zn      | C | 1.12 | 0.144  | 0.0326 | 1606.128 | 0.6361 | 1.2586 | 0.4219 | 56.213   |
| B2Zn10    | B | Zn      | D | 2.8  | 0.0179 | 0.0056 | 1821.53  | 1.1252 | 1.6171 | 0.6345 | 48.7013  |
| B2Zn10    | B | Zn      | D | 2.8  | 0.0127 | 0.004  | 1822.613 | 1.1252 | 1.6171 | 0.6327 | 48.1396  |
| B2Zn10    | B | Zn      | D | 2.8  | 0.0765 | 0.0239 | 1820.447 | 1.0809 | 1.6206 | 0.6336 | 52.9416  |
| B2Zn10    | B | Zn      | D | 2.8  | 0.0357 | 0.0111 | 1853.905 | 1.126  | 1.6314 | 0.6351 | 44.8421  |
| B2Zn10    | B | Zn      | D | 2.8  | 0.0357 | 0.0112 | 1789.155 | 1.1259 | 1.6321 | 0.6324 | 48.6687  |
| B2Zn10    | B | Zn      | D | 2.8  | 0.0362 | 0.0113 | 1798.863 | 1.0815 | 1.6325 | 0.6324 | 52.3469  |
| M2control | M | control | 0 | 0    | 0.5598 | 0.115  | 11.742   | 1.1876 | 1.0046 | 0.7149 | 135.0545 |
| M2control | M | control | 0 | 0    | 0.347  | 0.0713 | 12.005   | 1.1489 | 1.005  | 0.7797 | 142.9999 |
| M2control | M | control | 0 | 0    | 0.7495 | 0.154  | 11.479   | 1.1684 | 1.0076 | 0.7139 | 139.4581 |

|           |   |         |   |      |        |        |          |        |        |        |          |
|-----------|---|---------|---|------|--------|--------|----------|--------|--------|--------|----------|
| M2control | M | control | 0 | 0    | 0.5521 | 0.1134 | 12.044   | 1.1894 | 0.9647 | 0.7807 | 139.1708 |
| M2control | M | control | 0 | 0    | 0.5521 | 0.1134 | 11.44    | 1.1498 | 0.9661 | 0.7131 | 134.9877 |
| M2control | M | control | 0 | 0    | 0.5674 | 0.1191 | 11.68    | 1.1705 | 0.9649 | 0.7786 | 150.4054 |
| M2Cu1/2   | M | Cu      | A | 0.13 | 0.04   | 0.0102 | 36.231   | 1.9745 | 1.0221 | 1.2184 | 114.786  |
| M2Cu1/2   | M | Cu      | A | 0.13 | 0.0872 | 0.0222 | 33.91    | 1.9903 | 1.0228 | 1.2316 | 118.381  |
| M2Cu1/2   | M | Cu      | A | 0.13 | 0.027  | 0.0069 | 28.552   | 1.9869 | 1.0228 | 1.2207 | 119.134  |
| M2Cu1/2   | M | Cu      | A | 0.13 | 0.0514 | 0.0131 | 37.726   | 1.9752 | 1.1193 | 1.2316 | 117.4336 |
| M2Cu1/2   | M | Cu      | A | 0.13 | 0.0514 | 0.0131 | 34.736   | 1.9906 | 1.1201 | 1.2164 | 108.4079 |
| M2Cu1/2   | M | Cu      | A | 0.13 | 0.0533 | 0.0135 | 29.548   | 1.9876 | 1.1196 | 1.2296 | 121.4728 |
| M2Cu0     | M | Cu      | B | 0.26 | 0.0355 | 0.0152 | 40.293   | 1.5283 | 0.9387 | 1.265  | 112.1175 |
| M2Cu0     | M | Cu      | B | 0.26 | 0.0713 | 0.0306 | 40.843   | 1.4823 | 0.9401 | 1.2457 | 110.697  |
| M2Cu0     | M | Cu      | B | 0.26 | 0.019  | 0.0082 | 39.743   | 1.5061 | 0.9401 | 1.2652 | 119.1976 |
| M2Cu0     | M | Cu      | B | 0.26 | 0.0419 | 0.018  | 43.272   | 1.5294 | 1.004  | 1.2453 | 114.004  |
| M2Cu0     | M | Cu      | B | 0.26 | 0.0419 | 0.018  | 37.315   | 1.4828 | 1.0047 | 1.263  | 112.7611 |
| M2Cu0     | M | Cu      | B | 0.26 | 0.0419 | 0.0182 | 41.729   | 1.5066 | 1.0043 | 1.2446 | 122.0143 |
| M2Cu2.5   | M | Cu      | C | 0.65 | 0.031  | 0.0108 | 227.152  | 1.5251 | 1.1828 | 1.2931 | 106.1595 |
| M2Cu2.5   | M | Cu      | C | 0.65 | 0.0468 | 0.0164 | 227.29   | 1.4843 | 1.183  | 1.2875 | 107.9992 |
| M2Cu2.5   | M | Cu      | C | 0.65 | 0.0333 | 0.0116 | 227.014  | 1.505  | 1.1853 | 1.2958 | 112.5681 |
| M2Cu2.5   | M | Cu      | C | 0.65 | 0.037  | 0.0129 | 239.116  | 1.5251 | 1.2574 | 1.2859 | 108.9089 |
| M2Cu2.5   | M | Cu      | C | 0.65 | 0.037  | 0.0129 | 215.188  | 1.4859 | 1.2577 | 1.2922 | 105.6205 |
| M2Cu2.5   | M | Cu      | C | 0.65 | 0.0388 | 0.0133 | 234.99   | 1.5073 | 1.2575 | 1.2853 | 112.909  |
| M2Cu5     | M | Cu      | D | 1.3  | 0.0107 | 0.0038 | 246.8826 | 3.0667 | 1.4686 | 1.6275 | 56.0942  |
| M2Cu5     | M | Cu      | D | 1.3  | 0.0085 | 0.003  | 259.6134 | 3.1126 | 1.4696 | 1.618  | 51.2375  |
| M2Cu5     | M | Cu      | D | 1.3  | 0.0073 | 0.0026 | 234.5168 | 3.0902 | 1.471  | 1.6311 | 51.019   |
| M2Cu5     | M | Cu      | D | 1.3  | 0.0088 | 0.0031 | 223.6323 | 3.0674 | 1.484  | 1.62   | 54.4701  |
| M2Cu5     | M | Cu      | D | 1.3  | 0.0088 | 0.0031 | 247.9354 | 3.1139 | 1.4854 | 1.6272 | 58.9301  |
| M2Cu5     | M | Cu      | D | 1.3  | 0.0088 | 0.0031 | 257.7832 | 3.0911 | 1.4863 | 1.6166 | 52.945   |
| M2control | M | control | 0 | 0    | 0.5598 | 0.115  | 1.365    | 1.1876 | 1.0046 | 0.7149 | 135.0545 |
| M2control | M | control | 0 | 0    | 0.347  | 0.0713 | 1.378    | 1.1489 | 1.005  | 0.7797 | 142.9999 |
| M2control | M | control | 0 | 0    | 0.7495 | 0.154  | 1.352    | 1.1684 | 1.0076 | 0.7139 | 139.4581 |
| M2control | M | control | 0 | 0    | 0.5521 | 0.1134 | 1.582    | 1.1894 | 0.9647 | 0.7807 | 139.1708 |

|           |   |         |   |       |        |        |          |        |        |        |          |
|-----------|---|---------|---|-------|--------|--------|----------|--------|--------|--------|----------|
| M2control | M | control | 0 | 0     | 0.5521 | 0.1134 | 1.148    | 1.1498 | 0.9661 | 0.7131 | 134.9877 |
| M2control | M | control | 0 | 0     | 0.5674 | 0.1191 | 1.496    | 1.1705 | 0.9649 | 0.7786 | 150.4054 |
| M2Pb0     | M | Pb      | A | 0.025 | 0.5419 | 0.1657 | 7.049    | 0.9353 | 1.259  | 0.558  | 153.0549 |
| M2Pb0     | M | Pb      | A | 0.025 | 0.4703 | 0.1438 | 7.07     | 0.9403 | 1.2604 | 0.493  | 152.2131 |
| M2Pb0     | M | Pb      | A | 0.025 | 0.6618 | 0.2023 | 7.028    | 0.9391 | 1.2607 | 0.5615 | 154.7441 |
| M2Pb0     | M | Pb      | A | 0.025 | 0.558  | 0.1706 | 7.588    | 0.9366 | 1.3094 | 0.4973 | 153.3374 |
| M2Pb0     | M | Pb      | A | 0.025 | 0.558  | 0.1706 | 6.51     | 0.9416 | 1.3113 | 0.5567 | 151.458  |
| M2Pb0     | M | Pb      | A | 0.025 | 0.5661 | 0.1761 | 7.387    | 0.9403 | 1.3105 | 0.493  | 159.9701 |
| M2Pb10    | M | Pb      | B | 0.25  | 0.0496 | 0.0135 | 254.204  | 1.0563 | 1.4594 | 0.5207 | 123.1093 |
| M2Pb10    | M | Pb      | B | 0.25  | 0.0399 | 0.0108 | 254.349  | 1.0019 | 1.4609 | 0.5398 | 129.8722 |
| M2Pb10    | M | Pb      | B | 0.25  | 0.1075 | 0.0292 | 254.059  | 1.0294 | 1.4625 | 0.5227 | 122.5421 |
| M2Pb10    | M | Pb      | B | 0.25  | 0.0657 | 0.0178 | 254.874  | 1.0585 | 1.4913 | 0.5398 | 125.1746 |
| M2Pb10    | M | Pb      | B | 0.25  | 0.0657 | 0.0178 | 253.535  | 1.0032 | 1.4914 | 0.5185 | 116.6946 |
| M2Pb10    | M | Pb      | B | 0.25  | 0.0679 | 0.0181 | 254.506  | 1.031  | 1.4918 | 0.5387 | 136.7051 |
| M2Pb50    | M | Pb      | C | 1.25  | 0.0514 | 0.0164 | 3714.052 | 0.826  | 1.7721 | 0.6474 | 49.3994  |
| M2Pb50    | M | Pb      | C | 1.25  | 0.0291 | 0.0093 | 3714.146 | 0.7789 | 1.7723 | 0.6234 | 50.8998  |
| M2Pb50    | M | Pb      | C | 1.25  | 0.0135 | 0.0043 | 3713.958 | 0.8038 | 1.7745 | 0.6507 | 54.5563  |
| M2Pb50    | M | Pb      | C | 1.25  | 0.0313 | 0.01   | 3714.28  | 0.8263 | 1.8092 | 0.6244 | 51.6185  |
| M2Pb50    | M | Pb      | C | 1.25  | 0.0313 | 0.01   | 3713.823 | 0.7813 | 1.8102 | 0.6457 | 46.7063  |
| M2Pb50    | M | Pb      | C | 1.25  | 0.0324 | 0.0105 | 3714.11  | 0.8054 | 1.8094 | 0.6207 | 55.0058  |
| M2Pb100   | M | Pb      | D | 2.5   | 0.0052 | 0.002  | 6277.83  | 1.0656 | 2.2611 | 0.9483 | 61.2887  |
| M2Pb100   | M | Pb      | D | 2.5   | 0.0156 | 0.0059 | 6277.842 | 1.0779 | 2.2618 | 0.931  | 63.3051  |
| M2Pb100   | M | Pb      | D | 2.5   | 0.015  | 0.0057 | 6277.819 | 1.0766 | 2.2641 | 0.9519 | 67.9739  |
| M2Pb100   | M | Pb      | D | 2.5   | 0.0119 | 0.0045 | 6278.915 | 1.0679 | 2.2487 | 0.9306 | 64.1892  |
| M2Pb100   | M | Pb      | D | 2.5   | 0.0119 | 0.0045 | 6276.746 | 1.0816 | 2.251  | 0.9479 | 58.7183  |
| M2Pb100   | M | Pb      | D | 2.5   | 0.0121 | 0.0046 | 6278.542 | 1.0793 | 2.2515 | 0.9283 | 66.8893  |
| M2control | M | control | 0 | 0     | 0.5598 | 0.115  | 3.316    | 1.1876 | 1.0046 | 0.7149 | 135.0545 |
| M2control | M | control | 0 | 0     | 0.347  | 0.0713 | 3.454    | 1.1489 | 1.005  | 0.7797 | 142.9999 |
| M2control | M | control | 0 | 0     | 0.7495 | 0.154  | 3.178    | 1.1684 | 1.0076 | 0.7139 | 139.4581 |
| M2control | M | control | 0 | 0     | 0.5521 | 0.1134 | 3.592    | 1.1894 | 0.9647 | 0.7807 | 139.1708 |
| M2control | M | control | 0 | 0     | 0.5521 | 0.1134 | 3.04     | 1.1498 | 0.9661 | 0.7131 | 134.9877 |



|           |   |         |   |       |        |        |          |        |        |        |          |
|-----------|---|---------|---|-------|--------|--------|----------|--------|--------|--------|----------|
| M2control | M | control | 0 | 0     | 0.5674 | 0.1191 | 3.362    | 1.1705 | 0.9649 | 0.7786 | 150.4054 |
| M2Cr0     | M | Cr      | A | 0.036 | 0.3327 | 0.0806 | 9.69     | 0.9249 | 1.2166 | 0.8195 | 150.9389 |
| M2Cr0     | M | Cr      | A | 0.036 | 0.2745 | 0.0665 | 9.801    | 0.9268 | 1.2181 | 0.8548 | 148.857  |
| M2Cr0     | M | Cr      | A | 0.036 | 0.0589 | 0.0143 | 9.579    | 0.9286 | 1.2186 | 0.8219 | 153.3179 |
| M2Cr0     | M | Cr      | A | 0.036 | 0.222  | 0.0538 | 9.94     | 0.9255 | 1.1929 | 0.8563 | 151.0379 |
| M2Cr0     | M | Cr      | A | 0.036 | 0.222  | 0.0538 | 9.44     | 0.9271 | 1.1931 | 0.8182 | 148.5722 |
| M2Cr0     | M | Cr      | A | 0.036 | 0.2291 | 0.0562 | 9.746    | 0.9302 | 1.1942 | 0.8537 | 152.259  |
| M2Cr5     | M | Cr      | B | 0.18  | 0.2488 | 0.0615 | 4.666    | 1.3905 | 1.2801 | 1.0603 | 162.0858 |
| M2Cr5     | M | Cr      | B | 0.18  | 0.6496 | 0.1606 | 4.701    | 1.3986 | 1.2811 | 1.0672 | 159.9719 |
| M2Cr5     | M | Cr      | B | 0.18  | 0.3026 | 0.0748 | 4.631    | 1.3973 | 1.2833 | 1.06   | 166.1064 |
| M2Cr5     | M | Cr      | B | 0.18  | 0.4003 | 0.099  | 4.759    | 1.3905 | 1.359  | 1.0683 | 162.7214 |
| M2Cr5     | M | Cr      | B | 0.18  | 0.4003 | 0.099  | 4.573    | 1.3989 | 1.3591 | 1.059  | 151.7309 |
| M2Cr5     | M | Cr      | B | 0.18  | 0.4027 | 0.1029 | 4.693    | 1.3986 | 1.3604 | 1.0648 | 167.1296 |
| M2Cr10    | M | Cr      | C | 0.36  | 0.0417 | 0.0093 | 52.854   | 1.8605 | 1.5441 | 1.4489 | 143.8254 |
| M2Cr10    | M | Cr      | C | 0.36  | 0.0874 | 0.0196 | 53.002   | 1.8906 | 1.5449 | 1.3367 | 144.3867 |
| M2Cr10    | M | Cr      | C | 0.36  | 0.0633 | 0.0142 | 52.706   | 1.8784 | 1.5472 | 1.4522 | 147.5503 |
| M2Cr10    | M | Cr      | C | 0.36  | 0.0641 | 0.0144 | 53.812   | 1.8615 | 1.5813 | 1.3414 | 145.2541 |
| M2Cr10    | M | Cr      | C | 0.36  | 0.0641 | 0.0144 | 51.895   | 1.8922 | 1.5821 | 1.4478 | 137.5065 |
| M2Cr10    | M | Cr      | C | 0.36  | 0.0661 | 0.0145 | 53.345   | 1.8797 | 1.5846 | 1.3359 | 152.0525 |
| M2Cr25    | M | Cr      | D | 0.9   | 0.0819 | 0.0175 | 1036.215 | 2.2682 | 1.9577 | 1.9665 | 114.6427 |
| M2Cr25    | M | Cr      | D | 0.9   | 0.0539 | 0.0115 | 1036.43  | 2.3632 | 1.9587 | 1.9582 | 114.9299 |
| M2Cr25    | M | Cr      | D | 0.9   | 0.0226 | 0.0048 | 1036     | 2.3166 | 1.9577 | 1.9649 | 117.67   |
| M2Cr25    | M | Cr      | D | 0.9   | 0.0528 | 0.0113 | 1037.932 | 2.2686 | 2.0306 | 1.9579 | 115.7475 |
| M2Cr25    | M | Cr      | D | 0.9   | 0.0528 | 0.0113 | 1034.499 | 2.3643 | 2.0327 | 1.9649 | 111.1191 |
| M2Cr25    | M | Cr      | D | 0.9   | 0.0547 | 0.0117 | 1037.145 | 2.3177 | 2.0329 | 1.9552 | 120.6306 |
| M2control | M | control | 0 | 0     | 0.5598 | 0.115  | 3.21     | 1.1876 | 1.0046 | 0.7149 | 135.0545 |
| M2control | M | control | 0 | 0     | 0.347  | 0.0713 | 3.351    | 1.1489 | 1.005  | 0.7797 | 142.9999 |
| M2control | M | control | 0 | 0     | 0.7495 | 0.154  | 3.069    | 1.1684 | 1.0076 | 0.7139 | 139.4581 |
| M2control | M | control | 0 | 0     | 0.5521 | 0.1134 | 3.337    | 1.1894 | 0.9647 | 0.7807 | 139.1708 |
| M2control | M | control | 0 | 0     | 0.5521 | 0.1134 | 3.084    | 1.1498 | 0.9661 | 0.7131 | 134.9877 |
| M2control | M | control | 0 | 0     | 0.5674 | 0.1191 | 3.154    | 1.1705 | 0.9649 | 0.7786 | 150.4054 |

|           |   |         |   |           |        |        |          |        |        |        |          |
|-----------|---|---------|---|-----------|--------|--------|----------|--------|--------|--------|----------|
| M2Ni0     | M | Ni      | A | 0.025     | 0.7326 | 0.149  | 49.559   | 1.3343 | 1.3144 | 0.8656 | 125.6281 |
| M2Ni0     | M | Ni      | A | 0.025     | 0.3725 | 0.0758 | 50.463   | 1.3391 | 1.315  | 0.8366 | 132.3514 |
| M2Ni0     | M | Ni      | A | 0.025     | 0.4254 | 0.0865 | 48.655   | 1.3391 | 1.3145 | 0.8684 | 123.9587 |
| M2Ni0     | M | Ni      | A | 0.025     | 0.5102 | 0.1038 | 51.148   | 1.3352 | 1.326  | 0.8377 | 127.3127 |
| M2Ni0     | M | Ni      | A | 0.025     | 0.5102 | 0.1038 | 47.971   | 1.3397 | 1.326  | 0.8645 | 115.8402 |
| M2Ni0     | M | Ni      | A | 0.025     | 0.5321 | 0.104  | 49.714   | 1.3404 | 1.3271 | 0.8347 | 134.0832 |
| M2Ni5     | M | Ni      | B | 0.125     | 0.3279 | 0.0652 | 231.653  | 1.0652 | 1.5923 | 0.5236 | 94.733   |
| M2Ni5     | M | Ni      | B | 0.125     | 0.9036 | 0.1798 | 232.092  | 0.8189 | 1.5935 | 0.5138 | 96.5933  |
| M2Ni5     | M | Ni      | B | 0.125     | 0.2102 | 0.0418 | 231.214  | 0.9429 | 1.5943 | 0.5216 | 100.0679 |
| M2Ni5     | M | Ni      | B | 0.125     | 0.4806 | 0.0956 | 234.023  | 1.0656 | 1.4739 | 0.5124 | 97.1314  |
| M2Ni5     | M | Ni      | B | 0.125     | 0.4806 | 0.0956 | 229.283  | 0.8202 | 1.4757 | 0.5208 | 95.3513  |
| M2Ni5     | M | Ni      | B | 0.125     | 0.4889 | 0.0997 | 232.794  | 0.9445 | 1.4766 | 0.5111 | 106.4609 |
| M2Ni10    | M | Ni      | C | 0.25      | 0.4558 | 0.1128 | 523.4082 | 1.2083 | 1.8862 | 0.7805 | 70.2171  |
| M2Ni10    | M | Ni      | C | 0.25      | 0.4676 | 0.1157 | 523.578  | 1.1776 | 1.8874 | 0.7564 | 72.0584  |
| M2Ni10    | M | Ni      | C | 0.25      | 0.3679 | 0.0911 | 523.2383 | 1.1965 | 1.8879 | 0.7833 | 74.1622  |
| M2Ni10    | M | Ni      | C | 0.25      | 0.4304 | 0.1065 | 533.2668 | 1.2089 | 1.8671 | 0.7586 | 72.1459  |
| M2Ni10    | M | Ni      | C | 0.25      | 0.4304 | 0.1065 | 513.5495 | 1.1786 | 1.8675 | 0.7788 | 69.8119  |
| M2Ni10    | M | Ni      | C | 0.25      | 0.4465 | 0.1114 | 529.811  | 1.1988 | 1.8676 | 0.7553 | 75.165   |
| M2Ni25    | M | Ni      | D | 0.625     | 0.5118 | 0.1287 | 532.5633 | 1.4871 | 2.051  | 1.4004 | 41.3961  |
| M2Ni25    | M | Ni      | D | 0.625     | 0.1365 | 0.0343 | 532.5289 | 1.4875 | 2.051  | 1.4178 | 45.9043  |
| M2Ni25    | M | Ni      | D | 0.625     | 0.1513 | 0.0381 | 528.3633 | 1.4878 | 2.0524 | 1.4013 | 45.0004  |
| M2Ni25    | M | Ni      | D | 0.625     | 0.2665 | 0.067  | 540.2357 | 1.5032 | 2.057  | 1.4169 | 48.419   |
| M2Ni25    | M | Ni      | D | 0.625     | 0.2665 | 0.067  | 519.9161 | 1.5039 | 2.0578 | 1.4001 | 41.3684  |
| M2Ni25    | M | Ni      | D | 0.625     | 0.2722 | 0.0673 | 538.4257 | 1.5068 | 2.0581 | 1.4166 | 49.1367  |
| M2control | M | control | 0 | 0         | 0.5598 | 0.115  | 1.317    | 1.1876 | 1.0046 | 0.7149 | 135.0545 |
| M2control | M | control | 0 | 0         | 0.347  | 0.0713 | 1.633    | 1.1489 | 1.005  | 0.7797 | 142.9999 |
| M2control | M | control | 0 | 0         | 0.7495 | 0.154  | 1.7      | 1.1684 | 1.0076 | 0.7139 | 139.4581 |
| M2control | M | control | 0 | 0         | 0.5521 | 0.1134 | 1.517    | 1.1894 | 0.9647 | 0.7807 | 139.1708 |
| M2control | M | control | 0 | 0         | 0.5521 | 0.1134 | 1.516    | 1.1498 | 0.9661 | 0.7131 | 134.9877 |
| M2control | M | control | 0 | 0         | 0.5674 | 0.1191 | 1.834    | 1.1705 | 0.9649 | 0.7786 | 150.4054 |
| M2Cd0     | M | Cd      | A | 0.0000945 | 0.4609 | 0.0862 | 7.316    | 0.8701 | 1.1779 | 0.7913 | 165.5152 |

|           |   |         |   |           |        |        |          |        |        |        |          |
|-----------|---|---------|---|-----------|--------|--------|----------|--------|--------|--------|----------|
| M2Cd0     | M | Cd      | A | 0.0000945 | 0.5577 | 0.1043 | 8.21     | 1.0768 | 1.179  | 0.8205 | 164.3672 |
| M2Cd0     | M | Cd      | A | 0.0000945 | 0.3394 | 0.0635 | 6.422    | 0.9746 | 1.1784 | 0.7913 | 167.9058 |
| M2Cd0     | M | Cd      | A | 0.0000945 | 0.4527 | 0.0847 | 7.645    | 0.8717 | 1.2274 | 0.8188 | 165.9294 |
| M2Cd0     | M | Cd      | A | 0.0000945 | 0.4527 | 0.0847 | 6.986    | 1.0778 | 1.2282 | 0.7888 | 149.4741 |
| M2Cd0     | M | Cd      | A | 0.0000945 | 0.4666 | 0.0872 | 6.641    | 0.9772 | 1.2297 | 0.818  | 170.8798 |
| M2Cd100   | M | Cd      | B | 0.00945   | 0.0796 | 0.0132 | 224.227  | 0.6255 | 1.1594 | 1.2763 | 135.1718 |
| M2Cd100   | M | Cd      | B | 0.00945   | 0.332  | 0.0552 | 224.67   | 0.6321 | 1.1608 | 1.2871 | 136.2253 |
| M2Cd100   | M | Cd      | B | 0.00945   | 0.129  | 0.0214 | 223.784  | 0.6296 | 1.1602 | 1.2787 | 139.9783 |
| M2Cd100   | M | Cd      | B | 0.00945   | 0.1802 | 0.03   | 251.104  | 0.6267 | 1.1764 | 1.2884 | 137.1251 |
| M2Cd100   | M | Cd      | B | 0.00945   | 0.1802 | 0.03   | 197.35   | 0.6324 | 1.1783 | 1.2755 | 136.4865 |
| M2Cd100   | M | Cd      | B | 0.00945   | 0.1814 | 0.03   | 205.866  | 0.6318 | 1.1788 | 1.2857 | 149.262  |
| M2Cd500   | M | Cd      | C | 0.04725   | 0.0427 | 0.0065 | 728.021  | 1.1881 | 1.7958 | 1.1338 | 56.7841  |
| M2Cd500   | M | Cd      | C | 0.04725   | 0.0644 | 0.0098 | 728.211  | 1.3442 | 1.7973 | 1.1173 | 57.8862  |
| M2Cd500   | M | Cd      | C | 0.04725   | 0.1042 | 0.0158 | 727.831  | 1.2691 | 1.7969 | 1.1374 | 59.1142  |
| M2Cd500   | M | Cd      | C | 0.04725   | 0.0704 | 0.0107 | 788.47   | 1.189  | 1.7829 | 1.1178 | 57.9282  |
| M2Cd500   | M | Cd      | C | 0.04725   | 0.0704 | 0.0107 | 667.573  | 1.3448 | 1.7835 | 1.1333 | 52.3339  |
| M2Cd500   | M | Cd      | C | 0.04725   | 0.0729 | 0.0112 | 687.532  | 1.2694 | 1.7836 | 1.1173 | 60.7006  |
| M2Cd1000  | M | Cd      | D | 0.0945    | 0.1255 | 0.0202 | 1004.162 | 1.3333 | 2.3355 | 1.3    | 50.1999  |
| M2Cd1000  | M | Cd      | D | 0.0945    | 0.0849 | 0.0137 | 1004.702 | 1.358  | 2.3357 | 1.3099 | 52.2197  |
| M2Cd1000  | M | Cd      | D | 0.0945    | 0.1294 | 0.0209 | 1003.622 | 1.3457 | 2.3391 | 1.3037 | 55.4301  |
| M2Cd1000  | M | Cd      | D | 0.0945    | 0.1133 | 0.0183 | 1005.464 | 1.3355 | 2.3458 | 1.3127 | 52.6166  |
| M2Cd1000  | M | Cd      | D | 0.0945    | 0.1133 | 0.0183 | 1002.86  | 1.3587 | 2.3475 | 1.2988 | 51.0166  |
| M2Cd1000  | M | Cd      | D | 0.0945    | 0.1136 | 0.0192 | 1002.754 | 1.3475 | 2.3467 | 1.3081 | 53.6824  |
| M2control | M | control | 0 | 0         | 0.5598 | 0.115  | 82.584   | 1.1876 | 1.0046 | 0.7149 | 135.0545 |
| M2control | M | control | 0 | 0         | 0.347  | 0.0713 | 83.21    | 1.1489 | 1.005  | 0.7797 | 142.9999 |
| M2control | M | control | 0 | 0         | 0.7495 | 0.154  | 81.958   | 1.1684 | 1.0076 | 0.7139 | 139.4581 |
| M2control | M | control | 0 | 0         | 0.5521 | 0.1134 | 85.195   | 1.1894 | 0.9647 | 0.7807 | 139.1708 |
| M2control | M | control | 0 | 0         | 0.5521 | 0.1134 | 79.972   | 1.1498 | 0.9661 | 0.7131 | 134.9877 |
| M2control | M | control | 0 | 0         | 0.5674 | 0.1191 | 80.217   | 1.1705 | 0.9649 | 0.7786 | 150.4054 |
| M2Zn0     | M | Zn      | A | 0.28      | 0.8271 | 0.1277 | 835.053  | 0.6057 | 1.012  | 0.3467 | 139.8818 |
| M2Zn0     | M | Zn      | A | 0.28      | 0.4517 | 0.0697 | 837.779  | 0.6087 | 1.0123 | 0.344  | 140.6245 |

|           |   |         |   |      |        |        |          |        |        |        |          |
|-----------|---|---------|---|------|--------|--------|----------|--------|--------|--------|----------|
| M2Zn0     | M | Zn      | A | 0.28 | 0.5137 | 0.0793 | 832.327  | 0.6098 | 1.0129 | 0.349  | 141.2475 |
| M2Zn0     | M | Zn      | A | 0.28 | 0.5975 | 0.0923 | 856.122  | 0.6066 | 1.006  | 0.3457 | 140.5846 |
| M2Zn0     | M | Zn      | A | 0.28 | 0.5975 | 0.0923 | 813.984  | 0.6095 | 1.0072 | 0.3465 | 140.4337 |
| M2Zn0     | M | Zn      | A | 0.28 | 0.6173 | 0.093  | 818.281  | 0.611  | 1.0066 | 0.3427 | 153.1266 |
| M2Zn2     | M | Zn      | B | 0.56 | 0.6318 | 0.0872 | 1029.389 | 1.122  | 1.4855 | 0.7077 | 117.4377 |
| M2Zn2     | M | Zn      | B | 0.56 | 0.4116 | 0.0568 | 1030.121 | 1.1151 | 1.4867 | 0.7554 | 123.2055 |
| M2Zn2     | M | Zn      | B | 0.56 | 1.047  | 0.1444 | 1028.657 | 1.1203 | 1.4883 | 0.7077 | 117.3418 |
| M2Zn2     | M | Zn      | B | 0.56 | 0.6968 | 0.0961 | 1030.445 | 1.1223 | 1.5924 | 0.7551 | 119.3283 |
| M2Zn2     | M | Zn      | B | 0.56 | 0.6968 | 0.0961 | 1028.332 | 1.1171 | 1.5928 | 0.7061 | 118.7122 |
| M2Zn2     | M | Zn      | B | 0.56 | 0.7264 | 0.0963 | 1027.952 | 1.1223 | 1.5953 | 0.7546 | 123.8202 |
| M2Zn4     | M | Zn      | C | 1.12 | 0.256  | 0.0736 | 1511.049 | 2.1375 | 1.5858 | 1.3209 | 59.7506  |
| M2Zn4     | M | Zn      | C | 1.12 | 0.1868 | 0.0537 | 1511.998 | 2.1232 | 1.586  | 1.3491 | 59.4775  |
| M2Zn4     | M | Zn      | C | 1.12 | 0.24   | 0.069  | 1510.1   | 2.1305 | 1.588  | 1.3245 | 60.2596  |
| M2Zn4     | M | Zn      | C | 1.12 | 0.2276 | 0.0654 | 1512.773 | 2.1378 | 1.5389 | 1.3499 | 59.8292  |
| M2Zn4     | M | Zn      | C | 1.12 | 0.2276 | 0.0654 | 1509.326 | 2.1247 | 1.5404 | 1.3204 | 59.0091  |
| M2Zn4     | M | Zn      | C | 1.12 | 0.2381 | 0.0655 | 1508.951 | 2.1327 | 1.5415 | 1.3481 | 61.062   |
| M2Zn10    | M | Zn      | D | 2.8  | 0.1585 | 0.047  | 1783.038 | 2.4509 | 1.9436 | 1.7485 | 51.0465  |
| M2Zn10    | M | Zn      | D | 2.8  | 0.0361 | 0.0107 | 1784.158 | 2.4528 | 1.9444 | 1.7745 | 50.5559  |
| M2Zn10    | M | Zn      | D | 2.8  | 0.0787 | 0.0233 | 1781.918 | 2.4554 | 1.9436 | 1.7485 | 57.7216  |
| M2Zn10    | M | Zn      | D | 2.8  | 0.0911 | 0.027  | 1785.072 | 2.4132 | 1.987  | 1.7761 | 50.4669  |
| M2Zn10    | M | Zn      | D | 2.8  | 0.0911 | 0.027  | 1781.005 | 2.4135 | 1.9873 | 1.7474 | 50.3715  |
| M2Zn10    | M | Zn      | D | 2.8  | 0.0953 | 0.0277 | 1780.562 | 2.4164 | 1.9874 | 1.7723 | 51.9027  |
| N2control | N | control | 0 | 0    | 0.9841 | 0.1958 | 3.852    | 0.3506 | 1.1391 | 0.4466 | 125.3829 |
| N2control | N | control | 0 | 0    | 1.3421 | 0.267  | 4.053    | 0.3392 | 1.1404 | 0.4093 | 122.6318 |
| N2control | N | control | 0 | 0    | 0.7551 | 0.1502 | 3.651    | 0.345  | 1.142  | 0.4505 | 128.603  |
| N2control | N | control | 0 | 0    | 1.027  | 0.2043 | 4.08     | 0.3512 | 1.116  | 0.4114 | 125.5392 |
| N2control | N | control | 0 | 0    | 1.0271 | 0.2043 | 3.625    | 0.3394 | 1.1174 | 0.4455 | 120.5056 |
| N2control | N | control | 0 | 0    | 1.0353 | 0.2132 | 3.5      | 0.3457 | 1.1179 | 0.408  | 130.5224 |
| N2Cu1/2   | N | Cu      | A | 0.13 | 0.0523 | 0.0107 | 18.499   | 0.5946 | 1.1375 | 0.3487 | 115.9878 |
| N2Cu1/2   | N | Cu      | A | 0.13 | 0.0557 | 0.0114 | 18.952   | 0.5993 | 1.1385 | 0.3519 | 115.5858 |
| N2Cu1/2   | N | Cu      | A | 0.13 | 0.0303 | 0.0062 | 18.046   | 0.5983 | 1.1386 | 0.3493 | 118.0146 |

|           |   |         |   |       |        |        |          |        |        |        |          |
|-----------|---|---------|---|-------|--------|--------|----------|--------|--------|--------|----------|
| N2Cu1/2   | N | Cu      | A | 0.13  | 0.0458 | 0.0094 | 20.392   | 0.5951 | 1.1583 | 0.3522 | 116.5294 |
| N2Cu1/2   | N | Cu      | A | 0.13  | 0.046  | 0.0094 | 16.607   | 0.5995 | 1.1594 | 0.3476 | 114.1836 |
| N2Cu1/2   | N | Cu      | A | 0.13  | 0.0471 | 0.0097 | 16.785   | 0.5985 | 1.1606 | 0.3502 | 125.3421 |
| N2Cu0     | N | Cu      | B | 0.26  | 0.0422 | 0.0095 | 46.459   | 0.6082 | 1.1133 | 0.3469 | 116.2885 |
| N2Cu0     | N | Cu      | B | 0.26  | 0.0682 | 0.0154 | 46.827   | 0.646  | 1.1134 | 0.3847 | 113.1618 |
| N2Cu0     | N | Cu      | B | 0.26  | 0.0142 | 0.0032 | 46.091   | 0.6164 | 1.1165 | 0.3502 | 119.9567 |
| N2Cu0     | N | Cu      | B | 0.26  | 0.0413 | 0.0093 | 48.804   | 0.609  | 1.1076 | 0.3836 | 116.469  |
| N2Cu0     | N | Cu      | B | 0.26  | 0.0415 | 0.0094 | 44.114   | 0.646  | 1.1078 | 0.345  | 108.0921 |
| N2Cu0     | N | Cu      | B | 0.26  | 0.0429 | 0.0095 | 44.527   | 0.6172 | 1.1096 | 0.3831 | 126.6351 |
| N2Cu2.5   | N | Cu      | C | 0.65  | 0.0431 | 0.0113 | 211.396  | 0.4778 | 1.2675 | 0.3106 | 113.8276 |
| N2Cu2.5   | N | Cu      | C | 0.65  | 0.0401 | 0.0105 | 211.515  | 0.4651 | 1.2691 | 0.3647 | 112.8803 |
| N2Cu2.5   | N | Cu      | C | 0.65  | 0.0361 | 0.0095 | 211.277  | 0.4716 | 1.2686 | 0.3106 | 117.6149 |
| N2Cu2.5   | N | Cu      | C | 0.65  | 0.0397 | 0.0104 | 212.623  | 0.4784 | 1.239  | 0.3661 | 114.7743 |
| N2Cu2.5   | N | Cu      | C | 0.65  | 0.0398 | 0.0104 | 210.17   | 0.4652 | 1.2397 | 0.3106 | 112.4538 |
| N2Cu2.5   | N | Cu      | C | 0.65  | 0.0416 | 0.0107 | 210.46   | 0.4719 | 1.2426 | 0.3635 | 119.7547 |
| N2Cu5     | N | Cu      | D | 1.3   | 0.0042 | 0.0013 | 449.026  | 0.978  | 1.3892 | 0.5966 | 56.0942  |
| N2Cu5     | N | Cu      | D | 1.3   | 0.0022 | 0.0007 | 410.5268 | 0.9926 | 1.3893 | 0.6017 | 51.2375  |
| N2Cu5     | N | Cu      | D | 1.3   | 0.0142 | 0.0043 | 368.9785 | 0.9855 | 1.3918 | 0.5972 | 51.019   |
| N2Cu5     | N | Cu      | D | 1.3   | 0.0067 | 0.002  | 391.8683 | 0.9785 | 1.4018 | 0.6008 | 54.4701  |
| N2Cu5     | N | Cu      | D | 1.3   | 0.0068 | 0.0021 | 383.7998 | 0.9927 | 1.4037 | 0.594  | 58.9301  |
| N2Cu5     | N | Cu      | D | 1.3   | 0.0071 | 0.0022 | 363.776  | 0.9856 | 1.402  | 0.6005 | 52.945   |
| N2control | N | control | 0 | 0     | 0.9841 | 0.1958 | 0.289    | 0.3506 | 1.1391 | 0.4466 | 125.3829 |
| N2control | N | control | 0 | 0     | 1.3421 | 0.267  | 0.331    | 0.3392 | 1.1404 | 0.4093 | 122.6318 |
| N2control | N | control | 0 | 0     | 0.7551 | 0.1502 | 0.347    | 0.345  | 1.142  | 0.4505 | 128.603  |
| N2control | N | control | 0 | 0     | 1.027  | 0.2043 | 0.349    | 0.3512 | 1.116  | 0.4114 | 125.5392 |
| N2control | N | control | 0 | 0     | 1.0271 | 0.2043 | 0.388    | 0.3394 | 1.1174 | 0.4455 | 120.5056 |
| N2control | N | control | 0 | 0     | 1.0353 | 0.2132 | 0.313    | 0.3457 | 1.1179 | 0.408  | 130.5224 |
| N2Pb0     | N | Pb      | A | 0.025 | 0.5572 | 0.1305 | 9.05     | 0.2022 | 1.2036 | 0.4173 | 114.6646 |
| N2Pb0     | N | Pb      | A | 0.025 | 0.0744 | 0.0174 | 11.453   | 0.14   | 1.2042 | 0.4192 | 120.58   |
| N2Pb0     | N | Pb      | A | 0.025 | 0.6672 | 0.1563 | 10.647   | 0.1207 | 1.2054 | 0.4219 | 116.3345 |
| N2Pb0     | N | Pb      | A | 0.025 | 0.4327 | 0.1014 | 9.447    | 0.2025 | 1.1763 | 0.4192 | 117.193  |

|           |   |         |   |       |        |        |          |        |        |        |          |
|-----------|---|---------|---|-------|--------|--------|----------|--------|--------|--------|----------|
| N2Pb0     | N | Pb      | A | 0.025 | 0.4329 | 0.1014 | 8.653    | 0.1402 | 1.1771 | 0.4167 | 114.0341 |
| N2Pb0     | N | Pb      | A | 0.025 | 0.4492 | 0.1014 | 10.383   | 0.1209 | 1.1794 | 0.4184 | 128.4413 |
| N2Pb10    | N | Pb      | B | 0.25  | 0.0533 | 0.0133 | 190.799  | 0.3258 | 1.1866 | 0.3756 | 141.408  |
| N2Pb10    | N | Pb      | B | 0.25  | 0.0373 | 0.0093 | 190.805  | 0.3091 | 1.1876 | 0.4341 | 148.0912 |
| N2Pb10    | N | Pb      | B | 0.25  | 0.0493 | 0.0123 | 190.793  | 0.3175 | 1.1891 | 0.3767 | 138.9137 |
| N2Pb10    | N | Pb      | B | 0.25  | 0.0463 | 0.0115 | 195.236  | 0.3261 | 1.1633 | 0.435  | 142.8043 |
| N2Pb10    | N | Pb      | B | 0.25  | 0.0466 | 0.0116 | 186.361  | 0.3092 | 1.1633 | 0.3727 | 138.6348 |
| N2Pb10    | N | Pb      | B | 0.25  | 0.0482 | 0.0116 | 187.835  | 0.3176 | 1.1657 | 0.4313 | 149.5931 |
| N2Pb50    | N | Pb      | C | 1.25  | 0.0543 | 0.0132 | 2950.804 | 0.6999 | 1.2514 | 0.3291 | 62.3871  |
| N2Pb50    | N | Pb      | C | 1.25  | 0.0213 | 0.0052 | 2950.841 | 0.7186 | 1.2523 | 0.2928 | 61.4025  |
| N2Pb50    | N | Pb      | C | 1.25  | 0.0243 | 0.0059 | 2950.767 | 0.7254 | 1.2535 | 0.3317 | 68.5082  |
| N2Pb50    | N | Pb      | C | 1.25  | 0.033  | 0.008  | 2953.974 | 0.7004 | 1.2711 | 0.2915 | 64.0993  |
| N2Pb50    | N | Pb      | C | 1.25  | 0.0332 | 0.0081 | 2947.635 | 0.7193 | 1.2732 | 0.3285 | 61.0551  |
| N2Pb50    | N | Pb      | C | 1.25  | 0.0339 | 0.0084 | 2948.654 | 0.726  | 1.275  | 0.2902 | 67.9181  |
| N2Pb100   | N | Pb      | D | 2.5   | 0.0123 | 0.003  | 5360.563 | 0.9275 | 1.2803 | 0.4237 | 65.6326  |
| N2Pb100   | N | Pb      | D | 2.5   | 0.0133 | 0.0032 | 5361.232 | 0.8826 | 1.2818 | 0.447  | 65.8126  |
| N2Pb100   | N | Pb      | D | 2.5   | 0.0193 | 0.0046 | 5359.894 | 0.9784 | 1.2813 | 0.4278 | 71.4787  |
| N2Pb100   | N | Pb      | D | 2.5   | 0.0147 | 0.0035 | 5437.4   | 0.9278 | 1.3095 | 0.446  | 67.6413  |
| N2Pb100   | N | Pb      | D | 2.5   | 0.0149 | 0.0036 | 5283.726 | 0.8831 | 1.3097 | 0.4218 | 64.944   |
| N2Pb100   | N | Pb      | D | 2.5   | 0.0156 | 0.0036 | 5308.669 | 0.9787 | 1.311  | 0.4451 | 70.2151  |
| N2control | N | control | 0 | 0     | 0.9841 | 0.1958 | 1.638    | 0.3506 | 1.1391 | 0.4466 | 125.3829 |
| N2control | N | control | 0 | 0     | 1.3421 | 0.267  | 1.689    | 0.3392 | 1.1404 | 0.4093 | 122.6318 |
| N2control | N | control | 0 | 0     | 0.7551 | 0.1502 | 1.587    | 0.345  | 1.142  | 0.4505 | 128.603  |
| N2control | N | control | 0 | 0     | 1.027  | 0.2043 | 1.879    | 0.3512 | 1.116  | 0.4114 | 125.5392 |
| N2control | N | control | 0 | 0     | 1.0271 | 0.2043 | 1.397    | 0.3394 | 1.1174 | 0.4455 | 120.5056 |
| N2control | N | control | 0 | 0     | 1.0353 | 0.2132 | 1.427    | 0.3457 | 1.1179 | 0.408  | 130.5224 |
| N2Cr0     | N | Cr      | A | 0.036 | 0.2641 | 0.06   | 13.39    | 0.2778 | 1.0964 | 0.2786 | 153.0653 |
| N2Cr0     | N | Cr      | A | 0.036 | 0.6421 | 0.1458 | 13.613   | 0.2923 | 1.0974 | 0.2354 | 151.2827 |
| N2Cr0     | N | Cr      | A | 0.036 | 0.4181 | 0.0949 | 13.167   | 0.2974 | 1.0996 | 0.2806 | 154.2307 |
| N2Cr0     | N | Cr      | A | 0.036 | 0.4413 | 0.1002 | 15.261   | 0.2782 | 1.1097 | 0.2374 | 152.8596 |
| N2Cr0     | N | Cr      | A | 0.036 | 0.4414 | 0.1002 | 11.518   | 0.2928 | 1.1108 | 0.2778 | 150.7839 |

|           |   |         |   |       |        |        |         |        |        |        |          |
|-----------|---|---------|---|-------|--------|--------|---------|--------|--------|--------|----------|
| N2Cr0     | N | Cr      | A | 0.036 | 0.4512 | 0.1044 | 11.919  | 0.298  | 1.1128 | 0.2346 | 156.4407 |
| N2Cr5     | N | Cr      | B | 0.18  | 0.3213 | 0.0844 | 4.001   | 0.4455 | 1.2803 | 0.3974 | 138.3252 |
| N2Cr5     | N | Cr      | B | 0.18  | 0.0843 | 0.0221 | 4.038   | 0.4481 | 1.2818 | 0.3994 | 141.3926 |
| N2Cr5     | N | Cr      | B | 0.18  | 0.0115 | 0.003  | 3.964   | 0.4477 | 1.2831 | 0.3974 | 139.7425 |
| N2Cr5     | N | Cr      | B | 0.18  | 0.1387 | 0.0364 | 4.119   | 0.446  | 1.2544 | 0.4023 | 139.8201 |
| N2Cr5     | N | Cr      | B | 0.18  | 0.139  | 0.0365 | 3.883   | 0.4482 | 1.2549 | 0.3955 | 129.9681 |
| N2Cr5     | N | Cr      | B | 0.18  | 0.1397 | 0.0371 | 3.885   | 0.4485 | 1.2569 | 0.3989 | 142.0526 |
| N2Cr10    | N | Cr      | C | 0.36  | 0.0511 | 0.0134 | 58.803  | 0.5723 | 1.2592 | 0.3848 | 133.8209 |
| N2Cr10    | N | Cr      | C | 0.36  | 0.0841 | 0.022  | 58.85   | 0.5815 | 1.2595 | 0.4028 | 134.1327 |
| N2Cr10    | N | Cr      | C | 0.36  | 0.0731 | 0.0191 | 58.756  | 0.5778 | 1.2592 | 0.3873 | 136.9526 |
| N2Cr10    | N | Cr      | C | 0.36  | 0.0693 | 0.0181 | 60.286  | 0.573  | 1.2603 | 0.4039 | 134.9687 |
| N2Cr10    | N | Cr      | C | 0.36  | 0.0694 | 0.0182 | 57.319  | 0.5816 | 1.2618 | 0.382  | 126.9481 |
| N2Cr10    | N | Cr      | C | 0.36  | 0.0712 | 0.0187 | 57.766  | 0.5783 | 1.2626 | 0.4002 | 138.1036 |
| N2Cr25    | N | Cr      | D | 0.9   | 0.041  | 0.009  | 480.442 | 1.1301 | 1.4961 | 0.4559 | 98.8813  |
| N2Cr25    | N | Cr      | D | 0.9   | 0.051  | 0.0112 | 482.242 | 1.188  | 1.4975 | 0.4942 | 98.508   |
| N2Cr25    | N | Cr      | D | 0.9   | 0.024  | 0.0053 | 478.642 | 1.188  | 1.4972 | 0.4583 | 99.2001  |
| N2Cr25    | N | Cr      | D | 0.9   | 0.0387 | 0.0085 | 491.395 | 1.1301 | 1.4972 | 0.4969 | 98.8632  |
| N2Cr25    | N | Cr      | D | 0.9   | 0.0387 | 0.0085 | 469.488 | 1.1885 | 1.4986 | 0.4559 | 97.4635  |
| N2Cr25    | N | Cr      | D | 0.9   | 0.039  | 0.0089 | 471.339 | 1.1887 | 1.4974 | 0.4912 | 102.6872 |
| N2control | N | control | 0 | 0     | 0.9841 | 0.1958 | 2.442   | 0.3506 | 1.1391 | 0.4466 | 125.3829 |
| N2control | N | control | 0 | 0     | 1.3421 | 0.267  | 2.502   | 0.3392 | 1.1404 | 0.4093 | 122.6318 |
| N2control | N | control | 0 | 0     | 0.7551 | 0.1502 | 2.382   | 0.345  | 1.142  | 0.4505 | 128.603  |
| N2control | N | control | 0 | 0     | 1.027  | 0.2043 | 2.543   | 0.3512 | 1.116  | 0.4114 | 125.5392 |
| N2control | N | control | 0 | 0     | 1.0271 | 0.2043 | 2.34    | 0.3394 | 1.1174 | 0.4455 | 120.5056 |
| N2control | N | control | 0 | 0     | 1.0353 | 0.2132 | 2.314   | 0.3457 | 1.1179 | 0.408  | 130.5224 |
| N2Ni0     | N | Ni      | A | 0.025 | 0.7472 | 0.1601 | 48.959  | 0.402  | 1.1231 | 0.3071 | 136.0864 |
| N2Ni0     | N | Ni      | A | 0.025 | 0.6372 | 0.1365 | 49.728  | 0.4035 | 1.1246 | 0.3543 | 137.6464 |
| N2Ni0     | N | Ni      | A | 0.025 | 0.4362 | 0.0935 | 48.19   | 0.4035 | 1.1239 | 0.3055 | 139.7925 |
| N2Ni0     | N | Ni      | A | 0.025 | 0.6067 | 0.13   | 49.067  | 0.4025 | 1.1114 | 0.3549 | 137.8418 |
| N2Ni0     | N | Ni      | A | 0.025 | 0.6068 | 0.13   | 48.85   | 0.4037 | 1.1132 | 0.3044 | 134.9325 |
| N2Ni0     | N | Ni      | A | 0.025 | 0.6175 | 0.1325 | 48.118  | 0.4042 | 1.1132 | 0.3521 | 149.6299 |

|           |   |         |   |           |        |        |          |        |        |        |          |
|-----------|---|---------|---|-----------|--------|--------|----------|--------|--------|--------|----------|
| N2Ni5     | N | Ni      | B | 0.125     | 0.3373 | 0.0887 | 281.603  | 0.3184 | 1.1345 | 0.3126 | 75.557   |
| N2Ni5     | N | Ni      | B | 0.125     | 0.8983 | 0.2363 | 281.642  | 0.2448 | 1.1353 | 0.3666 | 76.4866  |
| N2Ni5     | N | Ni      | B | 0.125     | 0.2953 | 0.0777 | 281.564  | 0.2819 | 1.1377 | 0.3134 | 76.7096  |
| N2Ni5     | N | Ni      | B | 0.125     | 0.51   | 0.1342 | 303.319  | 0.3188 | 1.0915 | 0.3647 | 76.251   |
| N2Ni5     | N | Ni      | B | 0.125     | 0.5102 | 0.1342 | 259.887  | 0.2456 | 1.0925 | 0.3109 | 73.0824  |
| N2Ni5     | N | Ni      | B | 0.125     | 0.5106 | 0.1403 | 267.086  | 0.2821 | 1.0918 | 0.3644 | 82.1252  |
| N2Ni10    | N | Ni      | C | 0.25      | 0.463  | 0.1135 | 430.402  | 0.3802 | 1.0888 | 0.3522 | 56.9666  |
| N2Ni10    | N | Ni      | C | 0.25      | 0.465  | 0.114  | 430.823  | 0.3633 | 1.0903 | 0.3665 | 58.6545  |
| N2Ni10    | N | Ni      | C | 0.25      | 0.369  | 0.0905 | 429.981  | 0.3819 | 1.0902 | 0.3509 | 61.6088  |
| N2Ni10    | N | Ni      | C | 0.25      | 0.4323 | 0.106  | 434.872  | 0.3808 | 1.0651 | 0.3678 | 59.0767  |
| N2Ni10    | N | Ni      | C | 0.25      | 0.4323 | 0.106  | 425.932  | 0.3637 | 1.0668 | 0.3509 | 57.669   |
| N2Ni10    | N | Ni      | C | 0.25      | 0.4395 | 0.1061 | 427.001  | 0.382  | 1.067  | 0.3643 | 59.9437  |
| N2Ni25    | N | Ni      | D | 0.625     | 0.094  | 0.0223 | 447.6181 | 1.0728 | 1.592  | 0.6324 | 43.3895  |
| N2Ni25    | N | Ni      | D | 0.625     | 0.132  | 0.0314 | 448.0559 | 1.0588 | 1.5926 | 0.6311 | 50.2104  |
| N2Ni25    | N | Ni      | D | 0.625     | 0.153  | 0.0363 | 447.1802 | 1.1307 | 1.5948 | 0.6334 | 49.0634  |
| N2Ni25    | N | Ni      | D | 0.625     | 0.1263 | 0.03   | 452.2669 | 1.0736 | 1.5901 | 0.6318 | 47.0137  |
| N2Ni25    | N | Ni      | D | 0.625     | 0.1263 | 0.03   | 442.9693 | 1.0591 | 1.5916 | 0.6295 | 42.8158  |
| N2Ni25    | N | Ni      | D | 0.625     | 0.1276 | 0.0308 | 444.081  | 1.1312 | 1.5927 | 0.6295 | 54.4996  |
| N2control | N | control | 0 | 0         | 0.9841 | 0.1958 | 0.406    | 0.3506 | 1.1391 | 0.4466 | 125.3829 |
| N2control | N | control | 0 | 0         | 1.3421 | 0.267  | 0.441    | 0.3392 | 1.1404 | 0.4093 | 122.6318 |
| N2control | N | control | 0 | 0         | 0.7551 | 0.1502 | 0.445    | 0.345  | 1.142  | 0.4505 | 128.603  |
| N2control | N | control | 0 | 0         | 1.027  | 0.2043 | 0.441    | 0.3512 | 1.116  | 0.4114 | 125.5392 |
| N2control | N | control | 0 | 0         | 1.0271 | 0.2043 | 0.444    | 0.3394 | 1.1174 | 0.4455 | 120.5056 |
| N2control | N | control | 0 | 0         | 1.0353 | 0.2132 | 0.451    | 0.3457 | 1.1179 | 0.408  | 130.5224 |
| N2Cd0     | N | Cd      | A | 0.0000945 | 0.4661 | 0.096  | 15.682   | 0.2648 | 1.0875 | 0.5305 | 131.133  |
| N2Cd0     | N | Cd      | A | 0.0000945 | 0.5141 | 0.1059 | 16.609   | 0.3275 | 1.0889 | 0.5123 | 128.6669 |
| N2Cd0     | N | Cd      | A | 0.0000945 | 0.3491 | 0.0719 | 14.755   | 0.2965 | 1.0881 | 0.5324 | 135.4997 |
| N2Cd0     | N | Cd      | A | 0.0000945 | 0.443  | 0.0912 | 16.449   | 0.2649 | 1.119  | 0.5121 | 131.7665 |
| N2Cd0     | N | Cd      | A | 0.0000945 | 0.4431 | 0.0913 | 14.915   | 0.3277 | 1.1197 | 0.5299 | 120.2784 |
| N2Cd0     | N | Cd      | A | 0.0000945 | 0.4432 | 0.0922 | 15.266   | 0.2967 | 1.1207 | 0.5104 | 134.6499 |
| N2Cd100   | N | Cd      | B | 0.00945   | 0.081  | 0.0176 | 300.798  | 0.3158 | 0.9288 | 0.321  | 135.4652 |



|           |   |         |   |         |        |        |          |        |        |        |          |
|-----------|---|---------|---|---------|--------|--------|----------|--------|--------|--------|----------|
| N2Cd100   | N | Cd      | B | 0.00945 | 0.325  | 0.0707 | 301.78   | 0.3078 | 0.9304 | 0.3047 | 135.8541 |
| N2Cd100   | N | Cd      | B | 0.00945 | 0.152  | 0.0331 | 299.816  | 0.3128 | 0.9305 | 0.32   | 138.3243 |
| N2Cd100   | N | Cd      | B | 0.00945 | 0.186  | 0.0405 | 310.384  | 0.3163 | 0.9387 | 0.3057 | 136.5479 |
| N2Cd100   | N | Cd      | B | 0.00945 | 0.186  | 0.0405 | 291.212  | 0.3078 | 0.94   | 0.3188 | 129.2666 |
| N2Cd100   | N | Cd      | B | 0.00945 | 0.1915 | 0.0422 | 306.207  | 0.3134 | 0.9414 | 0.3042 | 141.9326 |
| N2Cd500   | N | Cd      | C | 0.04725 | 0.0543 | 0.011  | 663.634  | 0.3323 | 0.9668 | 0.1744 | 68.1641  |
| N2Cd500   | N | Cd      | C | 0.04725 | 0.0633 | 0.0128 | 664.986  | 0.3759 | 0.9675 | 0.2323 | 67.4083  |
| N2Cd500   | N | Cd      | C | 0.04725 | 0.1133 | 0.0229 | 662.282  | 0.355  | 0.9696 | 0.1739 | 73.5819  |
| N2Cd500   | N | Cd      | C | 0.04725 | 0.0767 | 0.0155 | 731.31   | 0.3326 | 0.978  | 0.2345 | 69.7181  |
| N2Cd500   | N | Cd      | C | 0.04725 | 0.0769 | 0.0156 | 595.959  | 0.3763 | 0.9794 | 0.1736 | 68.8618  |
| N2Cd500   | N | Cd      | C | 0.04725 | 0.0781 | 0.0156 | 707.399  | 0.355  | 0.9797 | 0.2318 | 74.2632  |
| N2Cd1000  | N | Cd      | D | 0.0945  | 0.0029 | 0.0005 | 646.18   | 0.5574 | 0.9737 | 0.1109 | 39.0114  |
| N2Cd1000  | N | Cd      | D | 0.0945  | 0.0081 | 0.0015 | 646.543  | 0.567  | 0.9753 | 0.1854 | 39.4403  |
| N2Cd1000  | N | Cd      | D | 0.0945  | 0.0321 | 0.0059 | 645.817  | 0.5946 | 0.974  | 0.1106 | 42.6513  |
| N2Cd1000  | N | Cd      | D | 0.0945  | 0.0143 | 0.0026 | 696.688  | 0.558  | 0.9632 | 0.1871 | 40.3676  |
| N2Cd1000  | N | Cd      | D | 0.0945  | 0.0144 | 0.0026 | 595.672  | 0.5672 | 0.9635 | 0.1094 | 38.5593  |
| N2Cd1000  | N | Cd      | D | 0.0945  | 0.015  | 0.0027 | 679.489  | 0.5952 | 0.9658 | 0.1839 | 43.7673  |
| N2control | N | control | 0 | 0       | 0.9841 | 0.1958 | 23.306   | 0.3506 | 1.1391 | 0.4466 | 125.3829 |
| N2control | N | control | 0 | 0       | 1.3421 | 0.267  | 24.269   | 0.3392 | 1.1404 | 0.4093 | 122.6318 |
| N2control | N | control | 0 | 0       | 0.7551 | 0.1502 | 22.343   | 0.345  | 1.142  | 0.4505 | 128.603  |
| N2control | N | control | 0 | 0       | 1.027  | 0.2043 | 25.374   | 0.3512 | 1.116  | 0.4114 | 125.5392 |
| N2control | N | control | 0 | 0       | 1.0271 | 0.2043 | 21.237   | 0.3394 | 1.1174 | 0.4455 | 120.5056 |
| N2control | N | control | 0 | 0       | 1.0353 | 0.2132 | 23.722   | 0.3457 | 1.1179 | 0.408  | 130.5224 |
| N2Zn0     | N | Zn      | A | 0.28    | 0.8271 | 0.1866 | 1304.169 | 0.3513 | 1.1065 | 0.3479 | 113.3539 |
| N2Zn0     | N | Zn      | A | 0.28    | 0.5721 | 0.1291 | 1304.756 | 0.3492 | 1.1084 | 0.3197 | 113.6191 |
| N2Zn0     | N | Zn      | A | 0.28    | 0.5191 | 0.1171 | 1303.582 | 0.3508 | 1.1072 | 0.3484 | 113.6921 |
| N2Zn0     | N | Zn      | A | 0.28    | 0.6393 | 0.1442 | 1306.456 | 0.3517 | 1.0974 | 0.3206 | 113.555  |
| N2Zn0     | N | Zn      | A | 0.28    | 0.6394 | 0.1443 | 1301.882 | 0.3492 | 1.0989 | 0.347  | 104.1588 |
| N2Zn0     | N | Zn      | A | 0.28    | 0.6665 | 0.151  | 1305.107 | 0.351  | 1.0986 | 0.3177 | 123.9913 |
| N2Zn2     | N | Zn      | B | 0.56    | 0.6492 | 0.1485 | 1266.127 | 0.3488 | 1.1136 | 0.35   | 74.4298  |
| N2Zn2     | N | Zn      | B | 0.56    | 0.4092 | 0.0936 | 1267.141 | 0.3552 | 1.115  | 0.3862 | 74.0218  |

|           |   |         |   |      |        |        |          |        |        |        |          |
|-----------|---|---------|---|------|--------|--------|----------|--------|--------|--------|----------|
| N2Zn2     | N | Zn      | B | 0.56 | 0.4612 | 0.1055 | 1265.113 | 0.352  | 1.1163 | 0.3521 | 78.2942  |
| N2Zn2     | N | Zn      | B | 0.56 | 0.5063 | 0.1158 | 1268.768 | 0.3489 | 1.0911 | 0.3886 | 75.5819  |
| N2Zn2     | N | Zn      | B | 0.56 | 0.5065 | 0.1159 | 1263.487 | 0.3554 | 1.0923 | 0.3481 | 75.353   |
| N2Zn2     | N | Zn      | B | 0.56 | 0.5085 | 0.1202 | 1266.874 | 0.3526 | 1.094  | 0.3854 | 83.43    |
| N2Zn4     | N | Zn      | C | 1.12 | 0.2612 | 0.0644 | 1677.482 | 0.5811 | 1.7674 | 0.7309 | 48.7013  |
| N2Zn4     | N | Zn      | C | 1.12 | 0.1852 | 0.0457 | 1679.105 | 0.5736 | 1.7675 | 0.7312 | 50.2104  |
| N2Zn4     | N | Zn      | C | 1.12 | 0.2402 | 0.0593 | 1675.859 | 0.5889 | 1.7695 | 0.7322 | 52.9416  |
| N2Zn4     | N | Zn      | C | 1.12 | 0.2287 | 0.0564 | 1680.195 | 0.5815 | 1.7259 | 0.7341 | 50.6178  |
| N2Zn4     | N | Zn      | C | 1.12 | 0.2288 | 0.0565 | 1674.769 | 0.5741 | 1.7269 | 0.7296 | 48.6687  |
| N2Zn4     | N | Zn      | C | 1.12 | 0.2296 | 0.0586 | 1677.667 | 0.5895 | 1.7286 | 0.7298 | 54.4996  |
| N2Zn10    | N | Zn      | D | 2.8  | 0.0491 | 0.0128 | 1929.104 | 1.3704 | 2.2942 | 1.1133 | 47.0643  |
| N2Zn10    | N | Zn      | D | 2.8  | 0.0291 | 0.0076 | 1930.971 | 1.3035 | 2.2952 | 1.09   | 42.6789  |
| N2Zn10    | N | Zn      | D | 2.8  | 0.0891 | 0.0232 | 1927.238 | 1.252  | 2.2966 | 1.1133 | 51.1895  |
| N2Zn10    | N | Zn      | D | 2.8  | 0.0557 | 0.0145 | 1932.224 | 1.3711 | 2.2954 | 1.0924 | 50.8548  |
| N2Zn10    | N | Zn      | D | 2.8  | 0.0558 | 0.0145 | 1925.984 | 1.3043 | 2.2974 | 1.1122 | 46.6764  |
| N2Zn10    | N | Zn      | D | 2.8  | 0.0575 | 0.0148 | 1929.317 | 1.2527 | 2.2972 | 1.0882 | 46.3247  |
| T2control | T | control | 0 | 0    | 0.5988 | 0.1125 | 7.515    | 0.3348 | 1.0692 | 0.5697 | 142.3843 |
| T2control | T | control | 0 | 0    | 1.2097 | 0.2272 | 7.824    | 0.3239 | 1.0707 | 0.5724 | 141.3293 |
| T2control | T | control | 0 | 0    | 1.0061 | 0.189  | 7.206    | 0.3294 | 1.0694 | 0.5692 | 149.1246 |
| T2control | T | control | 0 | 0    | 0.9382 | 0.1762 | 7.97     | 0.3349 | 1.0627 | 0.5719 | 144.2794 |
| T2control | T | control | 0 | 0    | 0.9382 | 0.1762 | 7.059    | 0.3245 | 1.063  | 0.5677 | 140.1134 |
| T2control | T | control | 0 | 0    | 0.9694 | 0.1816 | 6.902    | 0.3295 | 1.0656 | 0.5707 | 158.9114 |
| T2Cu1/2   | T | Cu      | A | 0.13 | 0.0802 | 0.0173 | 37.351   | 0.351  | 1.2116 | 0.6212 | 137.7592 |
| T2Cu1/2   | T | Cu      | A | 0.13 | 0.2321 | 0.05   | 37.929   | 0.3055 | 1.2124 | 0.6507 | 135.8613 |
| T2Cu1/2   | T | Cu      | A | 0.13 | 0.0972 | 0.0209 | 36.773   | 0.305  | 1.2126 | 0.624  | 142.7944 |
| T2Cu1/2   | T | Cu      | A | 0.13 | 0.1365 | 0.0294 | 38.259   | 0.3516 | 1.2275 | 0.6513 | 138.805  |
| T2Cu1/2   | T | Cu      | A | 0.13 | 0.1365 | 0.0294 | 36.442   | 0.3062 | 1.2287 | 0.6203 | 133.4293 |
| T2Cu1/2   | T | Cu      | A | 0.13 | 0.1418 | 0.0296 | 36.167   | 0.3056 | 1.2287 | 0.6482 | 139.2649 |
| T2Cu0     | T | Cu      | B | 0.26 | 0.0995 | 0.0276 | 66.128   | 0.5966 | 1.1413 | 0.744  | 119.4475 |
| T2Cu0     | T | Cu      | B | 0.26 | 0.0663 | 0.0184 | 66.378   | 0.5786 | 1.1426 | 0.7546 | 117.7579 |
| T2Cu0     | T | Cu      | B | 0.26 | 0.0638 | 0.0177 | 65.878   | 0.5879 | 1.1448 | 0.7451 | 124.9202 |

|           |   |         |   |       |        |        |          |        |        |        |          |
|-----------|---|---------|---|-------|--------|--------|----------|--------|--------|--------|----------|
| T2Cu0     | T | Cu      | B | 0.26  | 0.0765 | 0.0212 | 68.354   | 0.5974 | 1.1344 | 0.756  | 120.7085 |
| T2Cu0     | T | Cu      | B | 0.26  | 0.0765 | 0.0212 | 68.205   | 0.5789 | 1.1347 | 0.7434 | 118.0718 |
| T2Cu0     | T | Cu      | B | 0.26  | 0.0766 | 0.0215 | 65.878   | 0.5884 | 1.1358 | 0.7537 | 121.833  |
| T2Cu2.5   | T | Cu      | C | 0.65  | 0.0042 | 0.001  | 538.5824 | 0.675  | 1.8245 | 0.8531 | 89.6574  |
| T2Cu2.5   | T | Cu      | C | 0.65  | 0.0066 | 0.0016 | 539.3824 | 0.657  | 1.826  | 0.909  | 88.4214  |
| T2Cu2.5   | T | Cu      | C | 0.65  | 0.0056 | 0.0014 | 537.7824 | 0.6661 | 1.8252 | 0.8539 | 92.3778  |
| T2Cu2.5   | T | Cu      | C | 0.65  | 0.0055 | 0.0014 | 596.9648 | 0.6759 | 1.8252 | 0.9082 | 90.1522  |
| T2Cu2.5   | T | Cu      | C | 0.65  | 0.0055 | 0.0014 | 480.2008 | 0.6577 | 1.8274 | 0.8522 | 86.2967  |
| T2Cu2.5   | T | Cu      | C | 0.65  | 0.0055 | 0.0014 | 498.8616 | 0.6669 | 1.8302 | 0.9069 | 94.3782  |
| T2Cu5     | T | Cu      | D | 1.3   | 0.0185 | 0.0056 | 575.24   | 1.142  | 1.9892 | 1.0096 | 59.1281  |
| T2Cu5     | T | Cu      | D | 1.3   | 0.0141 | 0.0043 | 643.1474 | 1.0728 | 1.9905 | 0.9943 | 54.6506  |
| T2Cu5     | T | Cu      | D | 1.3   | 0.0003 | 0.0001 | 579.6105 | 1.0971 | 1.9934 | 1.0092 | 51.9755  |
| T2Cu5     | T | Cu      | D | 1.3   | 0.011  | 0.0033 | 615.6045 | 1.1423 | 1.8439 | 0.9975 | 55.4992  |
| T2Cu5     | T | Cu      | D | 1.3   | 0.011  | 0.0033 | 589.0541 | 1.0738 | 1.8454 | 1.0071 | 60.0605  |
| T2Cu5     | T | Cu      | D | 1.3   | 0.0114 | 0.0034 | 573.3809 | 1.098  | 1.847  | 0.9932 | 53.5005  |
| T2control | T | control | 0 | 0     | 0.5988 | 0.1125 | 1.434    | 0.3348 | 1.0692 | 0.5697 | 142.3843 |
| T2control | T | control | 0 | 0     | 1.2097 | 0.2272 | 1.459    | 0.3239 | 1.0707 | 0.5724 | 141.3293 |
| T2control | T | control | 0 | 0     | 1.0061 | 0.189  | 1.409    | 0.3294 | 1.0694 | 0.5692 | 149.1246 |
| T2control | T | control | 0 | 0     | 0.9382 | 0.1762 | 1.536    | 0.3349 | 1.0627 | 0.5719 | 144.2794 |
| T2control | T | control | 0 | 0     | 0.9382 | 0.1762 | 1.331    | 0.3245 | 1.063  | 0.5677 | 140.1134 |
| T2control | T | control | 0 | 0     | 0.9694 | 0.1816 | 1.34     | 0.3295 | 1.0656 | 0.5707 | 158.9114 |
| T2Pb0     | T | Pb      | A | 0.025 | 0.7197 | 0.1716 | 16.831   | 0.2653 | 0.9683 | 0.5588 | 146.3062 |
| T2Pb0     | T | Pb      | A | 0.025 | 0.8006 | 0.1909 | 17.193   | 0.2667 | 0.9691 | 0.58   | 143.2838 |
| T2Pb0     | T | Pb      | A | 0.025 | 0.1567 | 0.0374 | 16.469   | 0.2663 | 0.9696 | 0.5623 | 150.2362 |
| T2Pb0     | T | Pb      | A | 0.025 | 0.559  | 0.1333 | 17.44    | 0.2655 | 0.9608 | 0.581  | 146.6087 |
| T2Pb0     | T | Pb      | A | 0.025 | 0.559  | 0.1333 | 16.223   | 0.2672 | 0.9624 | 0.5578 | 136.7309 |
| T2Pb0     | T | Pb      | A | 0.025 | 0.5825 | 0.1373 | 16.063   | 0.2668 | 0.9609 | 0.579  | 159.4662 |
| T2Pb10    | T | Pb      | B | 0.25  | 0.06   | 0.0105 | 194.342  | 0.3154 | 1.0596 | 0.5802 | 131.5495 |
| T2Pb10    | T | Pb      | B | 0.25  | 0.0587 | 0.0103 | 194.344  | 0.2992 | 1.0596 | 0.594  | 129.6693 |
| T2Pb10    | T | Pb      | B | 0.25  | 0.0697 | 0.0122 | 194.34   | 0.3074 | 1.0625 | 0.5797 | 137.1198 |
| T2Pb10    | T | Pb      | B | 0.25  | 0.0628 | 0.011  | 196.035  | 0.3157 | 1.0357 | 0.5962 | 132.7795 |

|           |   |         |   |       |        |        |          |        |        |        |          |
|-----------|---|---------|---|-------|--------|--------|----------|--------|--------|--------|----------|
| T2Pb10    | T | Pb      | B | 0.25  | 0.0628 | 0.011  | 192.648  | 0.2996 | 1.0362 | 0.5778 | 120.0214 |
| T2Pb10    | T | Pb      | B | 0.25  | 0.0659 | 0.0111 | 193.211  | 0.3074 | 1.0358 | 0.5929 | 140.0651 |
| T2Pb50    | T | Pb      | C | 1.25  | 0.0216 | 0.0058 | 1132.747 | 1.0298 | 1.7474 | 1.2172 | 79.771   |
| T2Pb50    | T | Pb      | C | 1.25  | 0.0258 | 0.007  | 1132.866 | 1.0195 | 1.7486 | 1.2534 | 81.2797  |
| T2Pb50    | T | Pb      | C | 1.25  | 0.0201 | 0.0054 | 1132.628 | 1.0111 | 1.7477 | 1.2158 | 88.9017  |
| T2Pb50    | T | Pb      | C | 1.25  | 0.0225 | 0.0061 | 1179.79  | 1.031  | 1.7257 | 1.2544 | 83.3175  |
| T2Pb50    | T | Pb      | C | 1.25  | 0.0225 | 0.0061 | 1085.705 | 1.02   | 1.7257 | 1.2128 | 82.565   |
| T2Pb50    | T | Pb      | C | 1.25  | 0.0232 | 0.0061 | 1101.267 | 1.0111 | 1.7286 | 1.25   | 84.8197  |
| T2Pb100   | T | Pb      | D | 2.5   | 0.017  | 0.0057 | 3851.341 | 1.3169 | 2.3687 | 1.2528 | 59.7506  |
| T2Pb100   | T | Pb      | D | 2.5   | 0.0056 | 0.0019 | 3851.746 | 1.2693 | 2.3706 | 1.2717 | 59.4775  |
| T2Pb100   | T | Pb      | D | 2.5   | 0.0084 | 0.0028 | 3850.937 | 1.3259 | 2.3715 | 1.249  | 60.2596  |
| T2Pb100   | T | Pb      | D | 2.5   | 0.0103 | 0.0035 | 4011.285 | 1.3179 | 2.377  | 1.2751 | 59.8292  |
| T2Pb100   | T | Pb      | D | 2.5   | 0.0103 | 0.0035 | 3691.397 | 1.2697 | 2.3778 | 1.248  | 59.0091  |
| T2Pb100   | T | Pb      | D | 2.5   | 0.0105 | 0.0036 | 3744.307 | 1.3262 | 2.377  | 1.2703 | 61.062   |
| T2control | T | control | 0 | 0     | 0.5988 | 0.1125 | 2.756    | 0.3348 | 1.0692 | 0.5697 | 142.3843 |
| T2control | T | control | 0 | 0     | 1.2097 | 0.2272 | 2.86     | 0.3239 | 1.0707 | 0.5724 | 141.3293 |
| T2control | T | control | 0 | 0     | 1.0061 | 0.189  | 2.652    | 0.3294 | 1.0694 | 0.5692 | 149.1246 |
| T2control | T | control | 0 | 0     | 0.9382 | 0.1762 | 3.053    | 0.3349 | 1.0627 | 0.5719 | 144.2794 |
| T2control | T | control | 0 | 0     | 0.9382 | 0.1762 | 2.458    | 0.3245 | 1.063  | 0.5677 | 140.1134 |
| T2control | T | control | 0 | 0     | 0.9694 | 0.1816 | 2.453    | 0.3295 | 1.0656 | 0.5707 | 158.9114 |
| T2Cr0     | T | Cr      | A | 0.036 | 0.5732 | 0.1185 | 10.325   | 0.2834 | 1.103  | 0.5447 | 142.4156 |
| T2Cr0     | T | Cr      | A | 0.036 | 0.1371 | 0.0283 | 10.708   | 0.2839 | 1.1046 | 0.5525 | 145.7447 |
| T2Cr0     | T | Cr      | A | 0.036 | 0.3215 | 0.0664 | 9.942    | 0.2845 | 1.1046 | 0.5447 | 142.6822 |
| T2Cr0     | T | Cr      | A | 0.036 | 0.3439 | 0.0711 | 10.36    | 0.2838 | 1.0901 | 0.5558 | 143.6142 |
| T2Cr0     | T | Cr      | A | 0.036 | 0.3439 | 0.0711 | 10.289   | 0.2846 | 1.0909 | 0.5433 | 139.8857 |
| T2Cr0     | T | Cr      | A | 0.036 | 0.3467 | 0.0736 | 9.918    | 0.2847 | 1.0906 | 0.552  | 147.3842 |
| T2Cr5     | T | Cr      | B | 0.18  | 0.2688 | 0.0606 | 16.992   | 0.4074 | 1.17   | 0.5115 | 135.1012 |
| T2Cr5     | T | Cr      | B | 0.18  | 0.1078 | 0.0243 | 17.109   | 0.4097 | 1.1705 | 0.4873 | 135.7296 |
| T2Cr5     | T | Cr      | B | 0.18  | 0.2503 | 0.0565 | 16.875   | 0.4094 | 1.1717 | 0.5162 | 139.7178 |
| T2Cr5     | T | Cr      | B | 0.18  | 0.209  | 0.0471 | 17.878   | 0.4077 | 1.1941 | 0.4863 | 136.8495 |
| T2Cr5     | T | Cr      | B | 0.18  | 0.209  | 0.0471 | 16.106   | 0.4104 | 1.195  | 0.5112 | 124.2843 |

|           |   |         |   |       |        |        |         |        |        |        |          |
|-----------|---|---------|---|-------|--------|--------|---------|--------|--------|--------|----------|
| T2Cr5     | T | Cr      | B | 0.18  | 0.2125 | 0.0485 | 17.465  | 0.4097 | 1.1944 | 0.4858 | 143.86   |
| T2Cr10    | T | Cr      | C | 0.36  | 0.0719 | 0.0184 | 70.047  | 0.4038 | 1.2764 | 0.6202 | 124.7549 |
| T2Cr10    | T | Cr      | C | 0.36  | 0.0818 | 0.0209 | 70.074  | 0.3857 | 1.2781 | 0.6002 | 125.5912 |
| T2Cr10    | T | Cr      | C | 0.36  | 0.0803 | 0.0205 | 70.02   | 0.3745 | 1.2787 | 0.6223 | 126.191  |
| T2Cr10    | T | Cr      | C | 0.36  | 0.078  | 0.0199 | 70.331  | 0.4042 | 1.3301 | 0.5989 | 125.5124 |
| T2Cr10    | T | Cr      | C | 0.36  | 0.078  | 0.0199 | 69.763  | 0.3858 | 1.3318 | 0.6184 | 113.6359 |
| T2Cr10    | T | Cr      | C | 0.36  | 0.0785 | 0.0209 | 70.21   | 0.3746 | 1.3329 | 0.5989 | 132.7179 |
| T2Cr25    | T | Cr      | D | 0.9   | 0.1471 | 0.0417 | 958.451 | 0.934  | 2.4196 | 0.7025 | 132.756  |
| T2Cr25    | T | Cr      | D | 0.9   | 0.0424 | 0.012  | 959.658 | 0.8013 | 2.4196 | 0.7333 | 169.3311 |
| T2Cr25    | T | Cr      | D | 0.9   | 0.0513 | 0.0146 | 957.244 | 0.9148 | 2.4225 | 0.702  | 141.9831 |
| T2Cr25    | T | Cr      | D | 0.9   | 0.0803 | 0.0228 | 959.063 | 0.9348 | 2.532  | 0.7315 | 148.0234 |
| T2Cr25    | T | Cr      | D | 0.9   | 0.0803 | 0.0228 | 957.838 | 0.8024 | 2.5328 | 0.7011 | 140.092  |
| T2Cr25    | T | Cr      | D | 0.9   | 0.0831 | 0.0234 | 957.652 | 0.9152 | 2.5354 | 0.7306 | 156.6803 |
| T2control | T | control | 0 | 0     | 0.5988 | 0.1125 | 5.077   | 0.3348 | 1.0692 | 0.5697 | 142.3843 |
| T2control | T | control | 0 | 0     | 1.2097 | 0.2272 | 5.4     | 0.3239 | 1.0707 | 0.5724 | 141.3293 |
| T2control | T | control | 0 | 0     | 1.0061 | 0.189  | 4.754   | 0.3294 | 1.0694 | 0.5692 | 149.1246 |
| T2control | T | control | 0 | 0     | 0.9382 | 0.1762 | 5.143   | 0.3349 | 1.0627 | 0.5719 | 144.2794 |
| T2control | T | control | 0 | 0     | 0.9382 | 0.1762 | 5.011   | 0.3245 | 1.063  | 0.5677 | 140.1134 |
| T2control | T | control | 0 | 0     | 0.9694 | 0.1816 | 4.798   | 0.3295 | 1.0656 | 0.5707 | 158.9114 |
| T2Ni0     | T | Ni      | A | 0.025 | 0.9127 | 0.1845 | 32.239  | 0.26   | 1.022  | 0.5192 | 169.7534 |
| T2Ni0     | T | Ni      | A | 0.025 | 0.6272 | 0.1268 | 32.351  | 0.251  | 1.0237 | 0.5602 | 169.0549 |
| T2Ni0     | T | Ni      | A | 0.025 | 0.9523 | 0.1925 | 32.127  | 0.2565 | 1.024  | 0.5187 | 171.6658 |
| T2Ni0     | T | Ni      | A | 0.025 | 0.8307 | 0.1679 | 33.445  | 0.2605 | 1.0107 | 0.5588 | 170.158  |
| T2Ni0     | T | Ni      | A | 0.025 | 0.8307 | 0.1679 | 31.034  | 0.2514 | 1.0119 | 0.5173 | 158.1105 |
| T2Ni0     | T | Ni      | A | 0.025 | 0.8706 | 0.175  | 32.931  | 0.2568 | 1.0135 | 0.5577 | 177.2054 |
| T2Ni5     | T | Ni      | B | 0.125 | 0.4177 | 0.0721 | 137.617 | 0.3127 | 1.116  | 0.5331 | 97.5095  |
| T2Ni5     | T | Ni      | B | 0.125 | 0.3774 | 0.0651 | 137.953 | 0.2406 | 1.1171 | 0.5312 | 98.7436  |
| T2Ni5     | T | Ni      | B | 0.125 | 0.3976 | 0.0686 | 137.281 | 0.2769 | 1.1161 | 0.5386 | 101.1381 |
| T2Ni5     | T | Ni      | B | 0.125 | 0.3976 | 0.0686 | 153.764 | 0.3129 | 1.1174 | 0.5353 | 99.1304  |
| T2Ni5     | T | Ni      | B | 0.125 | 0.3976 | 0.0686 | 121.471 | 0.2413 | 1.1187 | 0.5331 | 95.314   |
| T2Ni5     | T | Ni      | B | 0.125 | 0.4069 | 0.0704 | 148.046 | 0.277  | 1.1195 | 0.5301 | 106.3533 |

|           |   |         |   |           |        |        |          |        |        |        |          |
|-----------|---|---------|---|-----------|--------|--------|----------|--------|--------|--------|----------|
| T2Ni10    | T | Ni      | C | 0.25      | 0.4502 | 0.1182 | 370.1457 | 0.3584 | 1.0617 | 0.4974 | 76.0959  |
| T2Ni10    | T | Ni      | C | 0.25      | 0.3721 | 0.0977 | 370.5078 | 0.3493 | 1.0622 | 0.5131 | 77.1385  |
| T2Ni10    | T | Ni      | C | 0.25      | 0.2723 | 0.0715 | 369.7837 | 0.3549 | 1.0632 | 0.4993 | 80.8459  |
| T2Ni10    | T | Ni      | C | 0.25      | 0.3649 | 0.0958 | 373.9899 | 0.3591 | 1.0627 | 0.5142 | 78.0267  |
| T2Ni10    | T | Ni      | C | 0.25      | 0.3649 | 0.0958 | 366.3015 | 0.3496 | 1.063  | 0.4954 | 72.8354  |
| T2Ni10    | T | Ni      | C | 0.25      | 0.3828 | 0.1002 | 367.2209 | 0.3551 | 1.065  | 0.5128 | 80.5046  |
| T2Ni25    | T | Ni      | D | 0.625     | 0.0732 | 0.0196 | 392.3545 | 0.5927 | 1.4537 | 0.7044 | 47.1835  |
| T2Ni25    | T | Ni      | D | 0.625     | 0.1366 | 0.0367 | 392.7382 | 0.6143 | 1.4556 | 0.7179 | 49.498   |
| T2Ni25    | T | Ni      | D | 0.625     | 0.1274 | 0.0342 | 391.9707 | 0.5979 | 1.4565 | 0.7047 | 53.1974  |
| T2Ni25    | T | Ni      | D | 0.625     | 0.1124 | 0.0302 | 396.4293 | 0.5931 | 1.4916 | 0.7197 | 50.6178  |
| T2Ni25    | T | Ni      | D | 0.625     | 0.1124 | 0.0302 | 388.2796 | 0.6147 | 1.4934 | 0.7038 | 48.8958  |
| T2Ni25    | T | Ni      | D | 0.625     | 0.1168 | 0.031  | 389.2541 | 0.5981 | 1.493  | 0.717  | 56.213   |
| T2control | T | control | 0 | 0         | 0.5988 | 0.1125 | 0.547    | 0.3348 | 1.0692 | 0.5697 | 142.3843 |
| T2control | T | control | 0 | 0         | 1.2097 | 0.2272 | 0.504    | 0.3239 | 1.0707 | 0.5724 | 141.3293 |
| T2control | T | control | 0 | 0         | 1.0061 | 0.189  | 0.529    | 0.3294 | 1.0694 | 0.5692 | 149.1246 |
| T2control | T | control | 0 | 0         | 0.9382 | 0.1762 | 0.56     | 0.3349 | 1.0627 | 0.5719 | 144.2794 |
| T2control | T | control | 0 | 0         | 0.9382 | 0.1762 | 0.55     | 0.3245 | 1.063  | 0.5677 | 140.1134 |
| T2control | T | control | 0 | 0         | 0.9694 | 0.1816 | 0.592    | 0.3295 | 1.0656 | 0.5707 | 158.9114 |
| T2Cd0     | T | Cd      | A | 0.0000945 | 0.7028 | 0.1464 | 11.408   | 0.184  | 1.1471 | 0.737  | 142.6038 |
| T2Cd0     | T | Cd      | A | 0.0000945 | 0.4004 | 0.0834 | 13.142   | 0.186  | 1.1477 | 0.6763 | 144.1258 |
| T2Cd0     | T | Cd      | A | 0.0000945 | 0.8514 | 0.1773 | 9.674    | 0.1852 | 1.1473 | 0.7388 | 144.0714 |
| T2Cd0     | T | Cd      | A | 0.0000945 | 0.6515 | 0.1357 | 11.848   | 0.1846 | 1.1466 | 0.6786 | 143.6003 |
| T2Cd0     | T | Cd      | A | 0.0000945 | 0.6515 | 0.1357 | 10.967   | 0.1866 | 1.1474 | 0.7357 | 142.5135 |
| T2Cd0     | T | Cd      | A | 0.0000945 | 0.6768 | 0.1372 | 9.967    | 0.186  | 1.1479 | 0.6763 | 149.7512 |
| T2Cd100   | T | Cd      | B | 0.00945   | 0.6953 | 0.1376 | 39.565   | 0.2964 | 1.2079 | 0.5119 | 31.2459  |
| T2Cd100   | T | Cd      | B | 0.00945   | 0.2494 | 0.0493 | 40.372   | 0.2872 | 1.2089 | 0.5234 | 31.953   |
| T2Cd100   | T | Cd      | B | 0.00945   | 0.2108 | 0.0417 | 38.758   | 0.3008 | 1.2107 | 0.5166 | 34.482   |
| T2Cd100   | T | Cd      | B | 0.00945   | 0.3852 | 0.0762 | 42.322   | 0.2967 | 1.2577 | 0.5245 | 32.5603  |
| T2Cd100   | T | Cd      | B | 0.00945   | 0.3852 | 0.0762 | 36.807   | 0.2879 | 1.2593 | 0.5114 | 31.6447  |
| T2Cd100   | T | Cd      | B | 0.00945   | 0.3969 | 0.0775 | 40.596   | 0.3014 | 1.2601 | 0.5207 | 34.4024  |
| T2Cd500   | T | Cd      | C | 0.04725   | 0.3547 | 0.066  | 353.142  | 0.8264 | 3.1055 | 0.5934 | 306.4077 |

|           |   |         |   |         |        |        |          |        |        |        |          |
|-----------|---|---------|---|---------|--------|--------|----------|--------|--------|--------|----------|
| T2Cd500   | T | Cd      | C | 0.04725 | 0.1593 | 0.0296 | 353.502  | 0.8294 | 3.1059 | 0.5235 | 285.9277 |
| T2Cd500   | T | Cd      | C | 0.04725 | 0.0586 | 0.0109 | 352.782  | 0.8294 | 3.1091 | 0.5945 | 322.6354 |
| T2Cd500   | T | Cd      | C | 0.04725 | 0.1909 | 0.0355 | 366.983  | 0.8266 | 3.1045 | 0.5213 | 304.9903 |
| T2Cd500   | T | Cd      | C | 0.04725 | 0.1909 | 0.0355 | 339.301  | 0.8298 | 3.1075 | 0.5917 | 300.8419 |
| T2Cd500   | T | Cd      | C | 0.04725 | 0.1937 | 0.0368 | 362.009  | 0.8304 | 3.1052 | 0.5196 | 324.6083 |
| T2Cd1000  | T | Cd      | D | 0.0945  | 0.0905 | 0.0231 | 686.332  | 0.592  | 1.4127 | 0.5005 | 99.3723  |
| T2Cd1000  | T | Cd      | D | 0.0945  | 0.2398 | 0.0613 | 686.594  | 0.5792 | 1.4133 | 0.4593 | 98.7508  |
| T2Cd1000  | T | Cd      | D | 0.0945  | 0.0195 | 0.005  | 686.07   | 0.5908 | 1.4138 | 0.5046 | 102.9821 |
| T2Cd1000  | T | Cd      | D | 0.0945  | 0.1166 | 0.0298 | 714.819  | 0.592  | 1.3931 | 0.461  | 100.3684 |
| T2Cd1000  | T | Cd      | D | 0.0945  | 0.1166 | 0.0298 | 657.846  | 0.5799 | 1.3934 | 0.5    | 94.1785  |
| T2Cd1000  | T | Cd      | D | 0.0945  | 0.122  | 0.0305 | 705.062  | 0.5908 | 1.3948 | 0.4586 | 101.2687 |
| T2control | T | control | 0 | 0       | 0.5988 | 0.1125 | 44.502   | 0.3348 | 1.0692 | 0.5697 | 142.3843 |
| T2control | T | control | 0 | 0       | 1.2097 | 0.2272 | 44.763   | 0.3239 | 1.0707 | 0.5724 | 141.3293 |
| T2control | T | control | 0 | 0       | 1.0061 | 0.189  | 44.241   | 0.3294 | 1.0694 | 0.5692 | 149.1246 |
| T2control | T | control | 0 | 0       | 0.9382 | 0.1762 | 44.547   | 0.3349 | 1.0627 | 0.5719 | 144.2794 |
| T2control | T | control | 0 | 0       | 0.9382 | 0.1762 | 44.457   | 0.3245 | 1.063  | 0.5677 | 140.1134 |
| T2control | T | control | 0 | 0       | 0.9694 | 0.1816 | 44.271   | 0.3295 | 1.0656 | 0.5707 | 158.9114 |
| T2Zn0     | T | Zn      | A | 0.28    | 0.8642 | 0.1888 | 1238.219 | 0.211  | 1.0995 | 0.6033 | 139.2501 |
| T2Zn0     | T | Zn      | A | 0.28    | 0.6044 | 0.1321 | 1238.245 | 0.212  | 1.1015 | 0.6277 | 137.9796 |
| T2Zn0     | T | Zn      | A | 0.28    | 0.5741 | 0.1254 | 1238.193 | 0.2124 | 1.1007 | 0.6022 | 141.3905 |
| T2Zn0     | T | Zn      | A | 0.28    | 0.6809 | 0.1488 | 1239.612 | 0.2114 | 1.0817 | 0.6303 | 139.54   |
| T2Zn0     | T | Zn      | A | 0.28    | 0.6809 | 0.1488 | 1236.826 | 0.2128 | 1.0821 | 0.6016 | 139.16   |
| T2Zn0     | T | Zn      | A | 0.28    | 0.6852 | 0.1546 | 1239.121 | 0.2127 | 1.0826 | 0.626  | 149.6915 |
| T2Zn2     | T | Zn      | B | 0.56    | 0.3214 | 0.0635 | 1396.06  | 0.459  | 1.2004 | 0.7403 | 101.572  |
| T2Zn2     | T | Zn      | B | 0.56    | 1.1584 | 0.2289 | 1396.692 | 0.4379 | 1.2012 | 0.7601 | 101.3904 |
| T2Zn2     | T | Zn      | B | 0.56    | 1.4235 | 0.2813 | 1395.428 | 0.4619 | 1.2035 | 0.7397 | 104.6074 |
| T2Zn2     | T | Zn      | B | 0.56    | 0.9678 | 0.1913 | 1397.36  | 0.4591 | 1.229  | 0.7621 | 102.5233 |
| T2Zn2     | T | Zn      | B | 0.56    | 0.9678 | 0.1913 | 1394.76  | 0.4386 | 1.2308 | 0.7389 | 101.0765 |
| T2Zn2     | T | Zn      | B | 0.56    | 0.9836 | 0.1979 | 1396.295 | 0.4622 | 1.2299 | 0.7585 | 110.6574 |
| T2Zn4     | T | Zn      | C | 1.12    | 0.5212 | 0.1136 | 1745.385 | 0.9938 | 1.8104 | 0.7871 | 94.8202  |
| T2Zn4     | T | Zn      | C | 1.12    | 0.2936 | 0.064  | 1745.857 | 0.9871 | 1.8123 | 0.8697 | 97.7161  |

|           |   |         |   |      |        |        |          |        |        |        |          |
|-----------|---|---------|---|------|--------|--------|----------|--------|--------|--------|----------|
| T2Zn4     | T | Zn      | C | 1.12 | 0.3417 | 0.0745 | 1744.913 | 0.9905 | 1.8149 | 0.7867 | 99.7188  |
| T2Zn4     | T | Zn      | C | 1.12 | 0.3855 | 0.0841 | 1746.148 | 0.9941 | 1.8322 | 0.8733 | 97.4184  |
| T2Zn4     | T | Zn      | C | 1.12 | 0.3855 | 0.0841 | 1744.623 | 0.9877 | 1.8343 | 0.7859 | 97.2063  |
| T2Zn4     | T | Zn      | C | 1.12 | 0.3957 | 0.0878 | 1745.422 | 0.9912 | 1.8336 | 0.8681 | 106.3776 |
| T2Zn10    | T | Zn      | D | 2.8  | 0.178  | 0.0632 | 1900.724 | 1.3639 | 1.9244 | 1.1314 | 47.0395  |
| T2Zn10    | T | Zn      | D | 2.8  | 0.103  | 0.0366 | 1901.238 | 1.4098 | 1.9265 | 1.0832 | 42.0733  |
| T2Zn10    | T | Zn      | D | 2.8  | 0.1267 | 0.045  | 1900.21  | 1.405  | 1.9253 | 1.1314 | 50.6526  |
| T2Zn10    | T | Zn      | D | 2.8  | 0.1359 | 0.0483 | 1901.555 | 1.3649 | 1.9454 | 1.0883 | 43.0251  |
| T2Zn10    | T | Zn      | D | 2.8  | 0.1359 | 0.0483 | 1899.894 | 1.4108 | 1.9458 | 1.1306 | 45.9251  |
| T2Zn10    | T | Zn      | D | 2.8  | 0.1369 | 0.0504 | 1900.765 | 1.4053 | 1.9467 | 1.0824 | 47.781   |
| P2control | P | control | O | 0    | 1.23   | 0.2999 | 14.715   | 0.7426 | 0.7589 | 0.5142 | 165.205  |
| P2control | P | control | O | 0    | 0.84   | 0.2048 | 14.801   | 0.7391 | 0.7579 | 0.5683 | 165.1449 |
| P2control | P | control | O | 0    | 1.071  | 0.2611 | 14.629   | 0.7348 | 0.755  | 0.5093 | 165.3422 |
| P2control | P | control | O | 0    | 1.047  | 0.2553 | 15.307   | 0.7874 | 0.8221 | 0.5658 | 165.2307 |
| P2control | P | control | O | 0    | 1.047  | 0.2553 | 14.123   | 0.7874 | 0.8198 | 0.4932 | 150.4464 |
| P2control | P | control | O | 0    | 1.0993 | 0.264  | 15.024   | 0.7847 | 0.8204 | 0.5461 | 173.4276 |
| P2Cu1/2   | P | Cu      | A | 0.13 | 0.0814 | 0.018  | 27.704   | 0.6785 | 0.6262 | 0.7057 | 148.9548 |
| P2Cu1/2   | P | Cu      | A | 0.13 | 0.0914 | 0.0202 | 28.599   | 0.7398 | 0.6267 | 0.6465 | 148.937  |
| P2Cu1/2   | P | Cu      | A | 0.13 | 0.0764 | 0.0169 | 26.809   | 0.7632 | 0.6284 | 0.7005 | 148.9843 |
| P2Cu1/2   | P | Cu      | A | 0.13 | 0.0827 | 0.0183 | 28.821   | 0.7418 | 0.6507 | 0.6639 | 148.9587 |
| P2Cu1/2   | P | Cu      | A | 0.13 | 0.083  | 0.0184 | 26.588   | 0.6708 | 0.6487 | 0.7325 | 148.8002 |
| P2Cu1/2   | P | Cu      | A | 0.13 | 0.0853 | 0.0191 | 27.554   | 0.6785 | 0.6465 | 0.6651 | 149.0982 |
| P2Cu0     | P | Cu      | B | 0.26 | 0.0514 | 0.0184 | 63.546   | 0.6713 | 0.7376 | 0.6655 | 141.9403 |
| P2Cu0     | P | Cu      | B | 0.26 | 0.0464 | 0.0166 | 63.861   | 0.6695 | 0.7444 | 0.6458 | 141.7629 |
| P2Cu0     | P | Cu      | B | 0.26 | 0.0334 | 0.012  | 63.231   | 0.6695 | 0.7473 | 0.6655 | 141.7861 |
| P2Cu0     | P | Cu      | B | 0.26 | 0.0433 | 0.0155 | 65.071   | 0.6964 | 0.7102 | 0.6458 | 141.8298 |
| P2Cu0     | P | Cu      | B | 0.26 | 0.0436 | 0.0156 | 62.021   | 0.6887 | 0.7076 | 0.6642 | 135.6889 |
| P2Cu0     | P | Cu      | B | 0.26 | 0.045  | 0.0158 | 64.247   | 0.71   | 0.7047 | 0.6609 | 147.0331 |
| P2Cu2.5   | P | Cu      | C | 0.65 | 0.0172 | 0.0049 | 212.696  | 0.5426 | 0.7406 | 0.6381 | 105.5551 |
| P2Cu2.5   | P | Cu      | C | 0.65 | 0.0322 | 0.0092 | 213.225  | 0.5416 | 0.7365 | 0.6239 | 105.8859 |
| P2Cu2.5   | P | Cu      | C | 0.65 | 0.0292 | 0.0084 | 212.167  | 0.5647 | 0.7341 | 0.6361 | 105.7616 |



|           |   |         |   |       |        |        |          |        |        |        |          |
|-----------|---|---------|---|-------|--------|--------|----------|--------|--------|--------|----------|
| P2Cu2.5   | P | Cu      | C | 0.65  | 0.026  | 0.0074 | 231.031  | 0.6223 | 0.7513 | 0.6226 | 105.7342 |
| P2Cu2.5   | P | Cu      | C | 0.65  | 0.0262 | 0.0075 | 194.361  | 0.6201 | 0.7521 | 0.6811 | 102.6632 |
| P2Cu2.5   | P | Cu      | C | 0.65  | 0.0263 | 0.0076 | 224.39   | 0.6213 | 0.7456 | 0.6831 | 108.9932 |
| P2Cu5     | P | Cu      | D | 1.3   | 0.0142 | 0.0047 | 245.4771 | 0.6346 | 0.8213 | 0.9589 | 57.0266  |
| P2Cu5     | P | Cu      | D | 1.3   | 0.0082 | 0.0027 | 254.5335 | 0.6348 | 0.8233 | 0.9795 | 58.1591  |
| P2Cu5     | P | Cu      | D | 1.3   | 0.0042 | 0.0014 | 220.3367 | 0.6348 | 0.8223 | 0.9609 | 62.4011  |
| P2Cu5     | P | Cu      | D | 1.3   | 0.0087 | 0.0029 | 217.1134 | 0.6434 | 0.8278 | 0.9824 | 59.0474  |
| P2Cu5     | P | Cu      | D | 1.3   | 0.0088 | 0.0029 | 240.9934 | 0.6434 | 0.8305 | 0.957  | 59.6925  |
| P2Cu5     | P | Cu      | D | 1.3   | 0.009  | 0.003  | 248.8428 | 0.6456 | 0.8289 | 0.9782 | 65.1377  |
| P2control | P | control | O | 0     | 1.23   | 0.2999 | 2.749    | 0.7426 | 0.7589 | 0.5142 | 165.205  |
| P2control | P | control | O | 0     | 0.84   | 0.2048 | 2.839    | 0.7391 | 0.7579 | 0.5683 | 165.1449 |
| P2control | P | control | O | 0     | 1.071  | 0.2611 | 2.659    | 0.7348 | 0.755  | 0.5093 | 165.3422 |
| P2control | P | control | O | 0     | 1.047  | 0.2553 | 2.871    | 0.7874 | 0.8221 | 0.5658 | 165.2307 |
| P2control | P | control | O | 0     | 1.047  | 0.2553 | 2.626    | 0.7874 | 0.8198 | 0.4932 | 150.4464 |
| P2control | P | control | O | 0     | 1.0993 | 0.264  | 2.74     | 0.7847 | 0.8204 | 0.5461 | 173.4276 |
| P2Pb0     | P | Pb      | A | 0.025 | 0.2043 | 0.0393 | 7.825    | 0.8476 | 0.579  | 0.6329 | 214.8122 |
| P2Pb0     | P | Pb      | A | 0.025 | 0.2063 | 0.0397 | 8.149    | 0.8479 | 0.5734 | 0.5663 | 214.6337 |
| P2Pb0     | P | Pb      | A | 0.025 | 0.3393 | 0.0652 | 7.501    | 0.8479 | 0.5756 | 0.5952 | 213.45   |
| P2Pb0     | P | Pb      | A | 0.025 | 0.2497 | 0.048  | 7.978    | 0.9123 | 0.5716 | 0.566  | 214.2986 |
| P2Pb0     | P | Pb      | A | 0.025 | 0.2499 | 0.0481 | 7.672    | 0.9094 | 0.5703 | 0.6293 | 214.2319 |
| P2Pb0     | P | Pb      | A | 0.025 | 0.2616 | 0.0504 | 7.603    | 0.9038 | 0.5712 | 0.5612 | 232.4325 |
| P2Pb10    | P | Pb      | B | 0.25  | 0.094  | 0.0254 | 122.792  | 0.7474 | 0.6462 | 0.538  | 184.2055 |
| P2Pb10    | P | Pb      | B | 0.25  | 0.158  | 0.0427 | 122.805  | 0.7461 | 0.6456 | 0.5584 | 183.9649 |
| P2Pb10    | P | Pb      | B | 0.25  | 0.034  | 0.0092 | 122.779  | 0.7487 | 0.6471 | 0.5368 | 183.902  |
| P2Pb10    | P | Pb      | B | 0.25  | 0.0953 | 0.0258 | 151.127  | 0.8359 | 0.6361 | 0.5562 | 184.0241 |
| P2Pb10    | P | Pb      | B | 0.25  | 0.0953 | 0.0258 | 124.458  | 0.8295 | 0.6355 | 0.5324 | 180.7201 |
| P2Pb10    | P | Pb      | B | 0.25  | 0.0987 | 0.0268 | 141.669  | 0.8321 | 0.6364 | 0.5515 | 201.1495 |
| P2Pb50    | P | Pb      | C | 1.25  | 0.0173 | 0.0041 | 3465.937 | 0.6794 | 0.6646 | 0.4825 | 95.9707  |
| P2Pb50    | P | Pb      | C | 1.25  | 0.0143 | 0.0034 | 3465.946 | 0.6889 | 0.6626 | 0.4657 | 95.0332  |
| P2Pb50    | P | Pb      | C | 1.25  | 0.0023 | 0.0005 | 3465.928 | 0.6818 | 0.7147 | 0.4795 | 94.7334  |
| P2Pb50    | P | Pb      | C | 1.25  | 0.011  | 0.0026 | 3468.767 | 0.7513 | 0.7265 | 0.5063 | 95.2457  |

|           |   |         |   |       |        |        |          |        |        |        |          |
|-----------|---|---------|---|-------|--------|--------|----------|--------|--------|--------|----------|
| P2Pb50    | P | Pb      | C | 1.25  | 0.0112 | 0.0027 | 3463.106 | 0.7481 | 0.7244 | 0.4729 | 87.3816  |
| P2Pb50    | P | Pb      | C | 1.25  | 0.0117 | 0.0028 | 3467.815 | 0.7455 | 0.7248 | 0.5066 | 99.4636  |
| P2Pb100   | P | Pb      | D | 2.5   | 0.0052 | 0.0014 | 4393.388 | 0.6468 | 0.8131 | 0.5344 | 93.045   |
| P2Pb100   | P | Pb      | D | 2.5   | 0.0132 | 0.0035 | 4393.455 | 0.631  | 0.8085 | 0.5398 | 93.4985  |
| P2Pb100   | P | Pb      | D | 2.5   | 0.0072 | 0.0019 | 4393.321 | 0.6383 | 0.8057 | 0.539  | 93.1886  |
| P2Pb100   | P | Pb      | D | 2.5   | 0.0083 | 0.0022 | 4395.073 | 0.6553 | 0.8674 | 0.5677 | 93.244   |
| P2Pb100   | P | Pb      | D | 2.5   | 0.0085 | 0.0023 | 4391.703 | 0.6406 | 0.8658 | 0.5386 | 84.5757  |
| P2Pb100   | P | Pb      | D | 2.5   | 0.0088 | 0.0023 | 4394.444 | 0.6394 | 0.8679 | 0.56   | 101.5207 |
| P2control | P | control | 0 | 0     | 1.23   | 0.2999 | 6.372    | 0.7426 | 0.7589 | 0.5142 | 165.205  |
| P2control | P | control | 0 | 0     | 0.84   | 0.2048 | 6.617    | 0.7391 | 0.7579 | 0.5683 | 165.1449 |
| P2control | P | control | 0 | 0     | 1.071  | 0.2611 | 6.127    | 0.7348 | 0.755  | 0.5093 | 165.3422 |
| P2control | P | control | 0 | 0     | 1.047  | 0.2553 | 7.105    | 0.7874 | 0.8221 | 0.5658 | 165.2307 |
| P2control | P | control | 0 | 0     | 1.047  | 0.2553 | 5.639    | 0.7874 | 0.8198 | 0.4932 | 150.4464 |
| P2control | P | control | 0 | 0     | 1.0993 | 0.264  | 6.615    | 0.7847 | 0.8204 | 0.5461 | 173.4276 |
| P2Cr0     | P | Cr      | A | 0.036 | 0.4322 | 0.0792 | 6.357    | 0.6845 | 0.4793 | 0.4465 | 181.6091 |
| P2Cr0     | P | Cr      | A | 0.036 | 0.5312 | 0.0973 | 6.545    | 0.6782 | 0.4798 | 0.5031 | 181.769  |
| P2Cr0     | P | Cr      | A | 0.036 | 0.5762 | 0.1055 | 6.169    | 0.6702 | 0.4784 | 0.4503 | 181.7438 |
| P2Cr0     | P | Cr      | A | 0.036 | 0.513  | 0.094  | 6.618    | 0.7178 | 0.4882 | 0.4969 | 181.7073 |
| P2Cr0     | P | Cr      | A | 0.036 | 0.5132 | 0.094  | 6.097    | 0.7209 | 0.4759 | 0.4622 | 171.04   |
| P2Cr0     | P | Cr      | A | 0.036 | 0.5368 | 0.0978 | 6.343    | 0.7146 | 0.4873 | 0.4926 | 197.9749 |
| P2Cr5     | P | Cr      | B | 0.18  | 0.2274 | 0.0429 | 4.538    | 0.7711 | 0.4735 | 0.557  | 185.4997 |
| P2Cr5     | P | Cr      | B | 0.18  | 0.1404 | 0.0265 | 4.568    | 0.7737 | 0.5019 | 0.5896 | 185.7921 |
| P2Cr5     | P | Cr      | B | 0.18  | 0.4144 | 0.0782 | 4.508    | 0.7703 | 0.5045 | 0.5492 | 187.0353 |
| P2Cr5     | P | Cr      | B | 0.18  | 0.2603 | 0.0491 | 4.675    | 0.8147 | 0.5019 | 0.5511 | 186.1091 |
| P2Cr5     | P | Cr      | B | 0.18  | 0.2606 | 0.0492 | 4.402    | 0.8239 | 0.5006 | 0.5605 | 179.1302 |
| P2Cr5     | P | Cr      | B | 0.18  | 0.2736 | 0.0513 | 4.6      | 0.8256 | 0.4996 | 0.5808 | 195.9157 |
| P2Cr10    | P | Cr      | C | 0.36  | 0.0473 | 0.0107 | 6.524    | 0.7594 | 0.5213 | 0.6849 | 155.3428 |
| P2Cr10    | P | Cr      | C | 0.36  | 0.0933 | 0.0211 | 6.542    | 0.757  | 0.5206 | 0.6591 | 155.4477 |
| P2Cr10    | P | Cr      | C | 0.36  | 0.1163 | 0.0263 | 6.506    | 0.7509 | 0.5191 | 0.6818 | 155.1467 |
| P2Cr10    | P | Cr      | C | 0.36  | 0.0853 | 0.0193 | 6.719    | 0.863  | 0.5421 | 0.656  | 155.3124 |
| P2Cr10    | P | Cr      | C | 0.36  | 0.0856 | 0.0194 | 6.328    | 0.9143 | 0.5413 | 0.6758 | 143.5313 |

|           |   |         |   |       |        |        |         |        |        |        |          |
|-----------|---|---------|---|-------|--------|--------|---------|--------|--------|--------|----------|
| P2Cr10    | P | Cr      | C | 0.36  | 0.0871 | 0.0197 | 6.375   | 0.9049 | 0.5409 | 0.65   | 156.1514 |
| P2Cr25    | P | Cr      | D | 0.9   | 0.0823 | 0.0188 | 894.657 | 0.8641 | 1.04   | 0.7721 | 118.8467 |
| P2Cr25    | P | Cr      | D | 0.9   | 0.0393 | 0.009  | 894.858 | 0.8698 | 1.0394 | 0.753  | 119.0817 |
| P2Cr25    | P | Cr      | D | 0.9   | 0.0643 | 0.0147 | 894.456 | 0.8698 | 1.0455 | 0.7683 | 118.9003 |
| P2Cr25    | P | Cr      | D | 0.9   | 0.0617 | 0.0141 | 903.755 | 0.9143 | 1.0576 | 0.7498 | 118.9429 |
| P2Cr25    | P | Cr      | D | 0.9   | 0.0619 | 0.0142 | 885.56  | 0.914  | 1.0572 | 0.7591 | 109.8888 |
| P2Cr25    | P | Cr      | D | 0.9   | 0.0634 | 0.0143 | 888.391 | 0.9132 | 1.0577 | 0.7377 | 127.65   |
| P2control | P | control | O | 0     | 1.23   | 0.2999 | 2.909   | 0.7426 | 0.7589 | 0.5142 | 165.205  |
| P2control | P | control | O | 0     | 0.84   | 0.2048 | 2.968   | 0.7391 | 0.7579 | 0.5683 | 165.1449 |
| P2control | P | control | O | 0     | 1.071  | 0.2611 | 2.85    | 0.7348 | 0.755  | 0.5093 | 165.3422 |
| P2control | P | control | O | 0     | 1.047  | 0.2553 | 3.195   | 0.7874 | 0.8221 | 0.5658 | 165.2307 |
| P2control | P | control | O | 0     | 1.047  | 0.2553 | 2.623   | 0.7874 | 0.8198 | 0.4932 | 150.4464 |
| P2control | P | control | O | 0     | 1.0993 | 0.264  | 2.66    | 0.7847 | 0.8204 | 0.5461 | 173.4276 |
| P2Ni0     | P | Ni      | A | 0.025 | 0.5671 | 0.1226 | 52.507  | 0.8247 | 0.6394 | 0.5981 | 165.7995 |
| P2Ni0     | P | Ni      | A | 0.025 | 1.0351 | 0.2237 | 53.521  | 0.8296 | 0.638  | 0.5537 | 165.8465 |
| P2Ni0     | P | Ni      | A | 0.025 | 0.8951 | 0.1934 | 51.493  | 0.8296 | 0.639  | 0.5941 | 165.7622 |
| P2Ni0     | P | Ni      | A | 0.025 | 0.8323 | 0.1799 | 56.751  | 0.9111 | 0.6795 | 0.5533 | 165.8028 |
| P2Ni0     | P | Ni      | A | 0.025 | 0.8324 | 0.1799 | 48.263  | 0.908  | 0.6755 | 0.5858 | 155.8977 |
| P2Ni0     | P | Ni      | A | 0.025 | 0.8656 | 0.1876 | 48.664  | 0.9016 | 0.6738 | 0.5464 | 179.9363 |
| P2Ni5     | P | Ni      | B | 0.125 | 0.8511 | 0.2115 | 179.072 | 0.703  | 0.6566 | 0.6069 | 70.5096  |
| P2Ni5     | P | Ni      | B | 0.125 | 0.6641 | 0.165  | 179.324 | 0.7018 | 0.6554 | 0.5944 | 70.4426  |
| P2Ni5     | P | Ni      | B | 0.125 | 0.7411 | 0.1841 | 178.82  | 0.7043 | 0.655  | 0.6052 | 70.3128  |
| P2Ni5     | P | Ni      | B | 0.125 | 0.752  | 0.1868 | 201.639 | 0.6888 | 0.663  | 0.5938 | 70.4217  |
| P2Ni5     | P | Ni      | B | 0.125 | 0.7521 | 0.1869 | 156.505 | 0.6804 | 0.662  | 0.5968 | 66.1927  |
| P2Ni5     | P | Ni      | B | 0.125 | 0.7602 | 0.1877 | 163.775 | 0.6879 | 0.6653 | 0.5886 | 70.8651  |
| P2Ni10    | P | Ni      | C | 0.25  | 0.2863 | 0.06   | 316.76  | 0.6684 | 0.8698 | 0.7297 | 67.0506  |
| P2Ni10    | P | Ni      | C | 0.25  | 0.7933 | 0.1662 | 317.557 | 0.6664 | 0.8704 | 0.6261 | 67.0729  |
| P2Ni10    | P | Ni      | C | 0.25  | 0.2243 | 0.047  | 315.963 | 0.6671 | 0.8709 | 0.7258 | 66.829   |
| P2Ni10    | P | Ni      | C | 0.25  | 0.4343 | 0.091  | 341.765 | 0.6649 | 0.8673 | 0.6242 | 66.9842  |
| P2Ni10    | P | Ni      | C | 0.25  | 0.4346 | 0.0911 | 291.756 | 0.6475 | 0.8682 | 0.7203 | 62.0383  |
| P2Ni10    | P | Ni      | C | 0.25  | 0.4541 | 0.0931 | 299.294 | 0.6524 | 0.8676 | 0.6182 | 73.0733  |

|           |   |         |   |           |        |        |          |        |        |        |          |
|-----------|---|---------|---|-----------|--------|--------|----------|--------|--------|--------|----------|
| P2Ni25    | P | Ni      | D | 0.625     | 0.2173 | 0.053  | 370.6092 | 0.8296 | 0.9893 | 0.738  | 56.993   |
| P2Ni25    | P | Ni      | D | 0.625     | 0.1073 | 0.0262 | 371.5417 | 0.8314 | 0.9919 | 0.7423 | 57.0119  |
| P2Ni25    | P | Ni      | D | 0.625     | 0.1013 | 0.0247 | 369.6767 | 0.8305 | 0.9897 | 0.7417 | 56.8046  |
| P2Ni25    | P | Ni      | D | 0.625     | 0.1417 | 0.0346 | 399.8651 | 0.8281 | 0.982  | 0.7423 | 56.9365  |
| P2Ni25    | P | Ni      | D | 0.625     | 0.1419 | 0.0346 | 341.3545 | 0.8298 | 0.9835 | 0.7377 | 52.7325  |
| P2Ni25    | P | Ni      | D | 0.625     | 0.1448 | 0.0358 | 350.174  | 0.8288 | 0.9844 | 0.7395 | 62.1123  |
| P2control | P | control | 0 | 0         | 1.23   | 0.2999 | 4.925    | 0.7426 | 0.7589 | 0.5142 | 165.205  |
| P2control | P | control | 0 | 0         | 0.84   | 0.2048 | 4.937    | 0.7391 | 0.7579 | 0.5683 | 165.1449 |
| P2control | P | control | 0 | 0         | 1.071  | 0.2611 | 4.913    | 0.7348 | 0.755  | 0.5093 | 165.3422 |
| P2control | P | control | 0 | 0         | 1.047  | 0.2553 | 4.991    | 0.7874 | 0.8221 | 0.5658 | 165.2307 |
| P2control | P | control | 0 | 0         | 1.047  | 0.2553 | 4.859    | 0.7874 | 0.8198 | 0.4932 | 150.4464 |
| P2control | P | control | 0 | 0         | 1.0993 | 0.264  | 4.869    | 0.7847 | 0.8204 | 0.5461 | 173.4276 |
| P2Cd0     | P | Cd      | A | 0.0000945 | 0.7572 | 0.1809 | 5.138    | 0.732  | 0.462  | 0.4229 | 193.1515 |
| P2Cd0     | P | Cd      | A | 0.0000945 | 0.5922 | 0.1415 | 5.006    | 0.732  | 0.4627 | 0.4438 | 193.6803 |
| P2Cd0     | P | Cd      | A | 0.0000945 | 0.4762 | 0.1138 | 5.27     | 0.7313 | 0.4581 | 0.4184 | 193.6998 |
| P2Cd0     | P | Cd      | A | 0.0000945 | 0.6083 | 0.1453 | 5.727    | 0.7848 | 0.4857 | 0.4355 | 193.5105 |
| P2Cd0     | P | Cd      | A | 0.0000945 | 0.6085 | 0.1454 | 5.49     | 0.7898 | 0.4862 | 0.4075 | 181.3248 |
| P2Cd0     | P | Cd      | A | 0.0000945 | 0.6357 | 0.152  | 5.777    | 0.7848 | 0.4818 | 0.409  | 211.0341 |
| P2Cd100   | P | Cd      | B | 0.00945   | 0.0981 | 0.0225 | 283.544  | 0.6561 | 0.4792 | 0.5201 | 128.2584 |
| P2Cd100   | P | Cd      | B | 0.00945   | 0.2801 | 0.0643 | 284.147  | 0.6488 | 0.478  | 0.492  | 128.0273 |
| P2Cd100   | P | Cd      | B | 0.00945   | 0.1471 | 0.0338 | 282.941  | 0.644  | 0.4764 | 0.516  | 128.2642 |
| P2Cd100   | P | Cd      | B | 0.00945   | 0.175  | 0.0402 | 301.857  | 0.6506 | 0.5554 | 0.4893 | 128.1833 |
| P2Cd100   | P | Cd      | B | 0.00945   | 0.1751 | 0.0402 | 265.23   | 0.6481 | 0.5542 | 0.5003 | 117.4096 |
| P2Cd100   | P | Cd      | B | 0.00945   | 0.1753 | 0.0412 | 270.732  | 0.6449 | 0.5593 | 0.4734 | 138.4543 |
| P2Cd500   | P | Cd      | C | 0.04725   | 0.1241 | 0.0264 | 759.56   | 0.4985 | 0.5926 | 0.5448 | 71.2324  |
| P2Cd500   | P | Cd      | C | 0.04725   | 0.2161 | 0.046  | 761.828  | 0.4943 | 0.5921 | 0.5193 | 71.8226  |
| P2Cd500   | P | Cd      | C | 0.04725   | 0.1701 | 0.0362 | 757.292  | 0.4985 | 0.588  | 0.5409 | 70.9462  |
| P2Cd500   | P | Cd      | C | 0.04725   | 0.17   | 0.0362 | 763.201  | 0.496  | 0.6111 | 0.5148 | 71.3338  |
| P2Cd500   | P | Cd      | C | 0.04725   | 0.1701 | 0.0362 | 755.92   | 0.4943 | 0.6124 | 0.5253 | 71.0294  |
| P2Cd500   | P | Cd      | C | 0.04725   | 0.1734 | 0.0375 | 754.865  | 0.496  | 0.6052 | 0.4999 | 73.9164  |
| P2Cd1000  | P | Cd      | D | 0.0945    | 0.102  | 0.0308 | 783.186  | 0.7047 | 0.6591 | 0.5898 | 78.1734  |

|           |   |         |   |        |        |        |          |        |        |        |          |
|-----------|---|---------|---|--------|--------|--------|----------|--------|--------|--------|----------|
| P2Cd1000  | P | Cd      | D | 0.0945 | 0.094  | 0.0284 | 783.969  | 0.6888 | 0.6591 | 0.488  | 73.7595  |
| P2Cd1000  | P | Cd      | D | 0.0945 | 0.074  | 0.0223 | 782.403  | 0.6953 | 0.6569 | 0.5856 | 76.8186  |
| P2Cd1000  | P | Cd      | D | 0.0945 | 0.09   | 0.0272 | 808.096  | 0.7262 | 0.6515 | 0.4833 | 76.2505  |
| P2Cd1000  | P | Cd      | D | 0.0945 | 0.09   | 0.0272 | 758.277  | 0.7171 | 0.6504 | 0.5549 | 75.6404  |
| P2Cd1000  | P | Cd      | D | 0.0945 | 0.0909 | 0.0284 | 765.797  | 0.7313 | 0.6441 | 0.5535 | 81.7815  |
| P2control | P | control | 0 | 0      | 1.23   | 0.2999 | 85.132   | 0.7426 | 0.7589 | 0.5142 | 165.205  |
| P2control | P | control | 0 | 0      | 0.84   | 0.2048 | 85.56    | 0.7391 | 0.7579 | 0.5683 | 165.1449 |
| P2control | P | control | 0 | 0      | 1.071  | 0.2611 | 84.704   | 0.7348 | 0.755  | 0.5093 | 165.3422 |
| P2control | P | control | 0 | 0      | 1.047  | 0.2553 | 91.712   | 0.7874 | 0.8221 | 0.5658 | 165.2307 |
| P2control | P | control | 0 | 0      | 1.047  | 0.2553 | 78.553   | 0.7874 | 0.8198 | 0.4932 | 150.4464 |
| P2control | P | control | 0 | 0      | 1.0993 | 0.264  | 80.318   | 0.7847 | 0.8204 | 0.5461 | 173.4276 |
| P2Zn0     | P | Zn      | A | 0.28   | 0.2174 | 0.0414 | 1298.67  | 0.6259 | 0.6559 | 0.5996 | 124.2432 |
| P2Zn0     | P | Zn      | A | 0.28   | 0.5744 | 0.1093 | 1303.216 | 0.6203 | 0.6526 | 0.5906 | 124.2846 |
| P2Zn0     | P | Zn      | A | 0.28   | 0.1444 | 0.0275 | 1294.124 | 0.6255 | 0.6528 | 0.597  | 124.3255 |
| P2Zn0     | P | Zn      | A | 0.28   | 0.3117 | 0.0593 | 1300.334 | 0.6708 | 0.717  | 0.5874 | 124.2844 |
| P2Zn0     | P | Zn      | A | 0.28   | 0.312  | 0.0594 | 1297.007 | 0.6712 | 0.7143 | 0.5877 | 121.9322 |
| P2Zn0     | P | Zn      | A | 0.28   | 0.3173 | 0.0615 | 1293.015 | 0.672  | 0.7147 | 0.5822 | 124.7475 |
| P2Zn2     | P | Zn      | B | 0.56   | 0.2473 | 0.0541 | 1998.376 | 0.669  | 0.9184 | 0.7699 | 111.4828 |
| P2Zn2     | P | Zn      | B | 0.56   | 0.2573 | 0.0563 | 2000.852 | 0.6694 | 0.9189 | 0.7945 | 110.4833 |
| P2Zn2     | P | Zn      | B | 0.56   | 0.1993 | 0.0436 | 1995.9   | 0.6694 | 0.918  | 0.7668 | 110.2429 |
| P2Zn2     | P | Zn      | B | 0.56   | 0.2343 | 0.0513 | 1998.915 | 0.7501 | 0.9121 | 0.7918 | 110.7363 |
| P2Zn2     | P | Zn      | B | 0.56   | 0.2346 | 0.0513 | 1997.836 | 0.7472 | 0.9089 | 0.7589 | 107.1801 |
| P2Zn2     | P | Zn      | B | 0.56   | 0.2356 | 0.0517 | 1995.54  | 0.7481 | 0.91   | 0.7866 | 113.4133 |
| P2Zn4     | P | Zn      | C | 1.12   | 0.1962 | 0.0472 | 2204.175 | 0.7788 | 1.1416 | 0.8589 | 82.4537  |
| P2Zn4     | P | Zn      | C | 1.12   | 0.0582 | 0.014  | 2204.189 | 0.775  | 1.1378 | 0.9018 | 82.5456  |
| P2Zn4     | P | Zn      | C | 1.12   | 0.1682 | 0.0405 | 2204.161 | 0.775  | 1.1382 | 0.8538 | 82.5256  |
| P2Zn4     | P | Zn      | C | 1.12   | 0.1407 | 0.0339 | 2205.76  | 0.8219 | 1.3173 | 0.8988 | 82.5083  |
| P2Zn4     | P | Zn      | C | 1.12   | 0.1408 | 0.0339 | 2202.59  | 0.819  | 1.3148 | 0.8455 | 77.6767  |
| P2Zn4     | P | Zn      | C | 1.12   | 0.1476 | 0.0354 | 2203.105 | 0.819  | 1.3114 | 0.9045 | 88.8947  |
| P2Zn10    | P | Zn      | D | 2.8    | 0.0092 | 0.003  | 2314.384 | 1.1966 | 1.6938 | 1.1351 | 70.0857  |
| P2Zn10    | P | Zn      | D | 2.8    | 0.0152 | 0.0049 | 2314.399 | 1.1973 | 1.6958 | 1.1155 | 70.1638  |

|        |   |    |   |     |        |        |          |        |        |        |         |
|--------|---|----|---|-----|--------|--------|----------|--------|--------|--------|---------|
| P2Zn10 | P | Zn | D | 2.8 | 0.0062 | 0.002  | 2314.369 | 1.1991 | 1.6945 | 1.1357 | 70.1467 |
| P2Zn10 | P | Zn | D | 2.8 | 0.01   | 0.0032 | 2316.048 | 1.2121 | 1.6686 | 1.1121 | 70.1321 |
| P2Zn10 | P | Zn | D | 2.8 | 0.0102 | 0.0033 | 2312.72  | 1.2129 | 1.6688 | 1.1335 | 66.0252 |
| P2Zn10 | P | Zn | D | 2.8 | 0.0106 | 0.0034 | 2313.26  | 1.214  | 1.6688 | 1.1117 | 75.5605 |
